# Supplementary material for: Microbiota-Produced N-Formyl Peptide fMLF Promotes Obesity-Induced Glucose Intolerance
Source: Oxford University Press journal article supplement (doi:10.2337/db18-1307), 2019-04-22
Supplement: db181307supplementarydata5.xlsx [file db181307supplementarydata5.xlsx]

## Sheet: Functional Pathways
Supplementary Table 4. Functional bacterial pathways predicted as significantly changed depending upon diet or genotype. Inferred metagenomics analysis prediction of functional bacterial pathways altered in WT HFD versus WT NCD mice or Fpr1-KO HFD versus WT HFD (comparison), ranked by p-value, with KEGG pathway information (n = 6-10 mice per Group). Significance was determined as a false discover…
Comparison	KEGG Pathway	Pathway Description	p value	Adjusted p value	log2FoldChange	SD
WT HFD vs WT NCD	ko00010	Glycolysis / Gluconeogenesis	0.00534099	0.00906563	4.64353	2.83948
WT HFD vs WT NCD	ko00071	Fatty acid degradation	0.00534099	0.00906563	3.88451	2.36466
WT HFD vs WT NCD	ko00350	Tyrosine metabolism	0.00534099	0.00906563	4.18307	2.46934
WT HFD vs WT NCD	ko00625	Chloroalkane and chloroalkene degradation	0.00534099	0.00906563	4.95197	3.03612
WT HFD vs WT NCD	ko00626	Naphthalene degradation	0.00534099	0.00906563	4.8603	2.99013
WT HFD vs WT NCD	ko00830	Retinol metabolism	0.00340524	0.00906563	4.23437	1.58096
WT HFD vs WT NCD	ko00980	Metabolism of xenobiotics by cytochrome P450	0.00340524	0.00906563	4.15918	1.54621
WT HFD vs WT NCD	ko00982	Drug metabolism - cytochrome P450	0.00340524	0.00906563	4.15315	1.5411
WT HFD vs WT NCD	ko01220	Degradation of aromatic compounds	0.00534099	0.00906563	4.66203	2.86624
WT HFD vs WT NCD	ko00260	Glycine, serine and threonine metabolism	0.00534099	0.00906563	4.04204	2.41179
WT HFD vs WT NCD	ko00270	Cysteine and methionine metabolism	0.00534099	0.00906563	4.02717	2.36421
WT HFD vs WT NCD	ko00300	Lysine biosynthesis	0.00534099	0.00906563	4.31693	2.61862
WT HFD vs WT NCD	ko01230	Biosynthesis of amino acids	0.00534099	0.00906563	3.95118	2.28029
WT HFD vs WT NCD	ko00650	Butanoate metabolism	0.00534099	0.00906563	4.42613	2.65775
WT HFD vs WT NCD	ko00561	Glycerolipid metabolism	0.00534099	0.00906563	4.57828	2.72791
WT HFD vs WT NCD	ko00640	Propanoate metabolism	0.00534099	0.00906563	4.00711	2.35977
WT HFD vs WT NCD	ko00040	Pentose and glucuronate interconversions	0.00534099	0.00906563	3.41888	1.84509
WT HFD vs WT NCD	ko00051	Fructose and mannose metabolism	0.00534099	0.00906563	4.62636	2.83573
WT HFD vs WT NCD	ko00521	Streptomycin biosynthesis	0.00534099	0.00906563	3.55608	2.0702
WT HFD vs WT NCD	ko00562	Inositol phosphate metabolism	0.00534099	0.00906563	3.67249	2.17942
WT HFD vs WT NCD	ko00053	Ascorbate and aldarate metabolism	0.00534099	0.00906563	2.70681	1.50506
WT HFD vs WT NCD	ko00500	Starch and sucrose metabolism	0.00534099	0.00906563	4.40148	2.61997
WT HFD vs WT NCD	ko00520	Amino sugar and nucleotide sugar metabolism	0.00534099	0.00906563	4.31122	2.61498
WT HFD vs WT NCD	ko00340	Histidine metabolism	0.00534099	0.00906563	2.58483	1.24319
WT HFD vs WT NCD	ko00400	Phenylalanine, tyrosine and tryptophan biosynthesis	0.00340524	0.00906563	3.32129	1.39465
WT HFD vs WT NCD	ko00630	Glyoxylate and dicarboxylate metabolism	0.00534099	0.00906563	3.64965	2.09903
WT HFD vs WT NCD	ko00620	Pyruvate metabolism	0.00534099	0.00906563	4.23329	2.5398
WT HFD vs WT NCD	ko00680	Methane metabolism	0.00534099	0.00906563	4.3925	2.65809
WT HFD vs WT NCD	ko01200	Carbon metabolism	0.00534099	0.00906563	4.10637	2.43906
WT HFD vs WT NCD	ko00072	Synthesis and degradation of ketone bodies	0.00534099	0.00906563	5.52234	3.52945
WT HFD vs WT NCD	ko00280	Valine, leucine and isoleucine degradation	0.00534099	0.00906563	3.51609	2.09132
WT HFD vs WT NCD	ko00900	Terpenoid backbone biosynthesis	0.00534099	0.00906563	4.46903	2.71858
WT HFD vs WT NCD	ko04152	AMPK signaling pathway	0.00534099	0.00906563	3.83295	2.21316
WT HFD vs WT NCD	ko00020	Citrate cycle (TCA cycle)	0.00534099	0.00906563	3.32107	1.91803
WT HFD vs WT NCD	ko00710	Carbon fixation in photosynthetic organisms	0.00534099	0.00906563	4.1458	2.48712
WT HFD vs WT NCD	ko00720	Carbon fixation pathways in prokaryotes	0.00534099	0.00906563	3.82113	2.26635
WT HFD vs WT NCD	ko02020	Two-component system	0.00534099	0.00906563	4.5295	2.59707
WT HFD vs WT NCD	ko01210	2-Oxocarboxylic acid metabolism	0.00534099	0.00906563	3.40543	1.76215
WT HFD vs WT NCD	ko00480	Glutathione metabolism	0.00534099	0.00906563	4.34416	2.64606
WT HFD vs WT NCD	ko04146	Peroxisome	0.00534099	0.00906563	3.01035	1.79502
WT HFD vs WT NCD	ko00030	Pentose phosphate pathway	0.00534099	0.00906563	4.28533	2.56814
WT HFD vs WT NCD	ko00052	Galactose metabolism	0.00534099	0.00906563	4.32264	2.62269
WT HFD vs WT NCD	ko05230	Central carbon metabolism in cancer	0.00534099	0.00906563	4.33416	2.63646
WT HFD vs WT NCD	ko00290	Valine, leucine and isoleucine biosynthesis	0.00534099	0.00906563	3.38895	1.61503
WT HFD vs WT NCD	ko00660	C5-Branched dibasic acid metabolism	0.00534099	0.00906563	3.8901	2.18604
WT HFD vs WT NCD	ko00770	Pantothenate and CoA biosynthesis	0.00534099	0.00906563	4.0501	2.35275
WT HFD vs WT NCD	ko00622	Xylene degradation	0.00534099	0.00906563	4.20428	2.57737
WT HFD vs WT NCD	ko00564	Glycerophospholipid metabolism	0.00534099	0.00906563	4.59699	2.78097
WT HFD vs WT NCD	ko00061	Fatty acid biosynthesis	0.00534099	0.00906563	3.10636	1.61721
WT HFD vs WT NCD	ko00780	Biotin metabolism	0.00534099	0.00906563	2.99571	1.41278
WT HFD vs WT NCD	ko01040	Biosynthesis of unsaturated fatty acids	0.00534099	0.00906563	3.80881	2.16968
WT HFD vs WT NCD	ko01212	Fatty acid metabolism	0.00534099	0.00906563	3.17555	1.65953
WT HFD vs WT NCD	ko00523	Polyketide sugar unit biosynthesis	0.00534099	0.00906563	3.52301	2.07626
WT HFD vs WT NCD	ko00230	Purine metabolism	0.00534099	0.00906563	4.29712	2.59696
WT HFD vs WT NCD	ko00362	Benzoate degradation	0.00534099	0.00906563	4.77454	2.88583
WT HFD vs WT NCD	ko00550	Peptidoglycan biosynthesis	0.00534099	0.00906563	4.49624	2.72562
WT HFD vs WT NCD	ko00740	Riboflavin metabolism	0.00534099	0.00906563	3.37901	1.81025
WT HFD vs WT NCD	ko00983	Drug metabolism - other enzymes	0.00534099	0.00906563	4.23101	2.5575
WT HFD vs WT NCD	ko00750	Vitamin B6 metabolism	0.00534099	0.00906563	3.30978	1.9013
WT HFD vs WT NCD	ko00363	Bisphenol degradation	0.00534099	0.00906563	5.49173	3.34457
WT HFD vs WT NCD	ko00591	Linoleic acid metabolism	0.00534099	0.00906563	5.56759	3.43581
WT HFD vs WT NCD	ko00310	Lysine degradation	0.00534099	0.00906563	4.14409	2.51559
WT HFD vs WT NCD	ko00330	Arginine and proline metabolism	0.00534099	0.00906563	3.50178	1.94837
WT HFD vs WT NCD	ko00380	Tryptophan metabolism	0.00534099	0.00906563	4.59831	2.74953
WT HFD vs WT NCD	ko00903	Limonene and pinene degradation	0.00340524	0.00906563	4.4678	1.51839
WT HFD vs WT NCD	ko04066	HIF-1 signaling pathway	0.00534099	0.00906563	4.72497	2.87548
WT HFD vs WT NCD	ko05010	Alzheimer's disease	0.00534099	0.00906563	4.56076	2.7465
WT HFD vs WT NCD	ko00250	Alanine, aspartate and glutamate metabolism	0.00534099	0.00906563	4.01062	2.40193
WT HFD vs WT NCD	ko00627	Aminobenzoate degradation	0.00534099	0.00906563	4.59337	2.7303
WT HFD vs WT NCD	ko00643	Styrene degradation	0.00340524	0.00906563	7.32039	1.49964
WT HFD vs WT NCD	ko00332	Carbapenem biosynthesis	0.00340524	0.00906563	2.91612	1.13513
WT HFD vs WT NCD	ko00633	Nitrotoluene degradation	0.00340524	0.00906563	7.10869	1.18005
WT HFD vs WT NCD	ko00401	Novobiocin biosynthesis	0.00340524	0.00906563	2.72408	1.16844
WT HFD vs WT NCD	ko00240	Pyrimidine metabolism	0.00534099	0.00906563	4.42705	2.69362
WT HFD vs WT NCD	ko00190	Oxidative phosphorylation	0.00534099	0.00906563	3.91644	2.33172
WT HFD vs WT NCD	ko05134	Legionellosis	0.00534099	0.00906563	4.30408	2.56549
WT HFD vs WT NCD	ko00430	Taurine and hypotaurine metabolism	0.00534099	0.00906563	4.30411	2.61775
WT HFD vs WT NCD	ko00910	Nitrogen metabolism	0.00534099	0.00906563	3.20985	1.66787
WT HFD vs WT NCD	ko00471	D-Glutamine and D-glutamate metabolism	0.00534099	0.00906563	4.39524	2.70082
WT HFD vs WT NCD	ko04964	Proximal tubule bicarbonate reclamation	0.00534099	0.00906563	4.0596	2.52995
WT HFD vs WT NCD	ko00311	Penicillin and cephalosporin biosynthesis	0.00534099	0.00906563	4.7457	2.98107
WT HFD vs WT NCD	ko00760	Nicotinate and nicotinamide metabolism	0.00534099	0.00906563	3.79725	2.26117
WT HFD vs WT NCD	ko00670	One carbon pool by folate	0.00534099	0.00906563	4.08651	2.45159
WT HFD vs WT NCD	ko00790	Folate biosynthesis	0.00534099	0.00906563	3.18517	1.78877
WT HFD vs WT NCD	ko00920	Sulfur metabolism	0.00340524	0.00906563	2.98798	1.28345
WT HFD vs WT NCD	ko00130	Ubiquinone and other terpenoid-quinone biosynthesis	0.00534099	0.00906563	3.77598	2.18213
WT HFD vs WT NCD	ko04918	Thyroid hormone synthesis	0.00534099	0.00906563	4.60975	2.80073
WT HFD vs WT NCD	ko00450	Selenocompound metabolism	0.00534099	0.00906563	4.3024	2.56473
WT HFD vs WT NCD	ko00361	Chlorocyclohexane and chlorobenzene degradation	0.00534099	0.00906563	5.27604	2.67762
WT HFD vs WT NCD	ko00621	Dioxin degradation	0.00534099	0.00906563	4.24929	2.60297
WT HFD vs WT NCD	ko05206	MicroRNAs in cancer	0.00534099	0.00906563	3.82205	2.1543
WT HFD vs WT NCD	ko04122	Sulfur relay system	0.00534099	0.00906563	4.39995	2.62354
WT HFD vs WT NCD	ko02030	Bacterial chemotaxis	0.00340524	0.00906563	6.15701	2.85299
WT HFD vs WT NCD	ko00940	Phenylpropanoid biosynthesis	0.00340524	0.00906563	3.72627	1.08567
WT HFD vs WT NCD	ko00460	Cyanoamino acid metabolism	0.00534099	0.00906563	4.04566	2.24367
WT HFD vs WT NCD	ko00970	Aminoacyl-tRNA biosynthesis	0.00534099	0.00906563	4.76387	2.92341
WT HFD vs WT NCD	ko01051	Biosynthesis of ansamycins	0.00340524	0.00906563	3.33815	1.12009
WT HFD vs WT NCD	ko00642	Ethylbenzene degradation	0.00340524	0.00906563	5.59611	1.74981
WT HFD vs WT NCD	ko01501	beta-Lactam resistance	0.00534099	0.00906563	4.00735	2.36992
WT HFD vs WT NCD	ko04910	Insulin signaling pathway	0.00340524	0.00906563	2.82609	1.28016
WT HFD vs WT NCD	ko00600	Sphingolipid metabolism	0.00534099	0.00906563	3.12983	1.82338
WT HFD vs WT NCD	ko00510	N-Glycan biosynthesis	0.00340524	0.00906563	-5.86687	2.02925
WT HFD vs WT NCD	ko03013	RNA transport	0.00534099	0.00906563	4.55633	2.76361
WT HFD vs WT NCD	ko00730	Thiamine metabolism	0.00534099	0.00906563	4.15631	2.43791
WT HFD vs WT NCD	ko00908	Zeatin biosynthesis	0.00534099	0.00906563	4.06288	2.45841
WT HFD vs WT NCD	ko00473	D-Alanine metabolism	0.00534099	0.00906563	4.89476	3.03378
WT HFD vs WT NCD	ko00524	Butirosin and neomycin biosynthesis	0.00340524	0.00906563	3.32152	1.27704
WT HFD vs WT NCD	ko04930	Type II diabetes mellitus	0.00534099	0.00906563	4.29228	2.6097
WT HFD vs WT NCD	ko04973	Carbohydrate digestion and absorption	0.00340524	0.00906563	2.87475	1.37692
WT HFD vs WT NCD	ko03018	RNA degradation	0.00534099	0.00906563	4.29939	2.5926
WT HFD vs WT NCD	ko04622	RIG-I-like receptor signaling pathway	0.00336134	0.00906563	Inf	NA
WT HFD vs WT NCD	ko04626	Plant-pathogen interaction	0.00340524	0.00906563	3.15916	1.4046
WT HFD vs WT NCD	ko05203	Viral carcinogenesis	0.00534099	0.00906563	4.49655	2.74702
WT HFD vs WT NCD	ko04070	Phosphatidylinositol signaling system	0.00534099	0.00906563	3.73297	2.15796
WT HFD vs WT NCD	ko04917	Prolactin signaling pathway	0.00534099	0.00906563	5.74402	3.75157
WT HFD vs WT NCD	ko01502	Vancomycin resistance	0.00534099	0.00906563	4.438	2.67027
WT HFD vs WT NCD	ko05152	Tuberculosis	0.00534099	0.00906563	4.43146	2.67381
WT HFD vs WT NCD	ko04724	Glutamatergic synapse	0.00534099	0.00906563	3.98499	2.42851
WT HFD vs WT NCD	ko03430	Mismatch repair	0.00534099	0.00906563	4.58735	2.795
WT HFD vs WT NCD	ko03410	Base excision repair	0.00534099	0.00906563	4.51746	2.76616
WT HFD vs WT NCD	ko03440	Homologous recombination	0.00534099	0.00906563	4.5026	2.74272
WT HFD vs WT NCD	ko00511	Other glycan degradation	0.00534099	0.00906563	2.32224	1.29735
WT HFD vs WT NCD	ko04141	Protein processing in endoplasmic reticulum	0.00534099	0.00906563	3.4639	2.08982
WT HFD vs WT NCD	ko04974	Protein digestion and absorption	0.00340524	0.00906563	-6.92617	1.91127
WT HFD vs WT NCD	ko04112	Cell cycle - Caulobacter	0.00534099	0.00906563	4.42149	2.69563
WT HFD vs WT NCD	ko05150	Staphylococcus aureus infection	0.00534099	0.00906563	5.58001	3.6167
WT HFD vs WT NCD	ko04727	GABAergic synapse	0.00534099	0.00906563	3.81758	2.31153
WT HFD vs WT NCD	ko05120	Epithelial cell signaling in Helicobacter pylori infection	0.00340524	0.00906563	2.64174	1.1623
WT HFD vs WT NCD	ko00120	Primary bile acid biosynthesis	0.00534099	0.00906563	4.83234	3.00745
WT HFD vs WT NCD	ko00121	Secondary bile acid biosynthesis	0.00534099	0.00906563	4.83254	3.0076
WT HFD vs WT NCD	ko05340	Primary immunodeficiency	0.00534099	0.00906563	4.67338	2.8844
WT HFD vs WT NCD	ko04940	Type I diabetes mellitus	0.00534099	0.00906563	4.02848	2.41951
WT HFD vs WT NCD	ko04920	Adipocytokine signaling pathway	0.00340524	0.00906563	-6.35234	1.88896
WT HFD vs WT NCD	ko05200	Pathways in cancer	0.00534099	0.00906563	4.31081	2.63866
WT HFD vs WT NCD	ko05211	Renal cell carcinoma	0.00534099	0.00906563	5.55277	3.67476
WT HFD vs WT NCD	ko01055	Biosynthesis of vancomycin group antibiotics	0.00534099	0.00906563	3.45883	2.03852
WT HFD vs WT NCD	ko01054	Nonribosomal peptide structures	0.00534099	0.00906563	5.82455	3.91315
WT HFD vs WT NCD	ko00253	Tetracycline biosynthesis	0.00340524	0.00906563	3.41321	1.27804
WT HFD vs WT NCD	ko03420	Nucleotide excision repair	0.00534099	0.00906563	4.54591	2.78532
WT HFD vs WT NCD	ko03030	DNA replication	0.00534099	0.00906563	4.51253	2.75675
WT HFD vs WT NCD	ko03010	Ribosome	0.00534099	0.00906563	4.48816	2.74979
WT HFD vs WT NCD	ko03060	Protein export	0.00534099	0.00906563	4.37856	2.66173
WT HFD vs WT NCD	ko02010	ABC transporters	0.00534099	0.00906563	4.82663	2.90146
WT HFD vs WT NCD	ko00195	Photosynthesis	0.00534099	0.00906563	4.66183	2.8183
WT HFD vs WT NCD	ko05111	Vibrio cholerae pathogenic cycle	0.00534099	0.00906563	4.34531	2.59838
WT HFD vs WT NCD	ko05132	Salmonella infection	0.00340524	0.00906563	4.60245	1.43599
WT HFD vs WT NCD	ko03070	Bacterial secretion system	0.00534099	0.00906563	4.27138	2.58722
WT HFD vs WT NCD	ko02060	Phosphotransferase system (PTS)	0.00534099	0.00906563	5.78589	3.80524
WT HFD vs WT NCD	ko05205	Proteoglycans in cancer	0.00534099	0.00906563	4.58966	2.80497
WT HFD vs WT NCD	ko03020	RNA polymerase	0.00534099	0.00906563	4.78191	2.95783
WT HFD vs WT NCD	ko03008	Ribosome biogenesis in eukaryotes	0.00534099	0.00906563	4.57835	2.8176
WT HFD vs WT NCD	ko00603	Glycosphingolipid biosynthesis - globo series	0.00534099	0.00906563	2.48061	1.4101
WT HFD vs WT NCD	ko00410	beta-Alanine metabolism	0.00822097	0.0135962	2.34465	1.36227
WT HFD vs WT NCD	ko00860	Porphyrin and chlorophyll metabolism	0.00822097	0.0135962	2.23179	1.16763
WT HFD vs WT NCD	ko00960	Tropane, piperidine and pyridine alkaloid biosynthesis	0.00822097	0.0135962	2.22787	1.18728
WT HFD vs WT NCD	ko05014	Amyotrophic lateral sclerosis (ALS)	0.00822097	0.0135962	-3.44238	1.8424
WT HFD vs WT NCD	ko00360	Phenylalanine metabolism	0.0124193	0.0200262	2.20133	1.31097
WT HFD vs WT NCD	ko00440	Phosphonate and phosphinate metabolism	0.0124193	0.0200262	2.16813	1.39916
WT HFD vs WT NCD	ko04210	Apoptosis	0.0124193	0.0200262	-5.90429	2.47679
WT HFD vs WT NCD	ko02040	Flagellar assembly	0.0124193	0.0200262	6.88052	4.21557
WT HFD vs WT NCD	ko01053	Biosynthesis of siderophore group nonribosomal peptides	0.0184162	0.0289718	2.20844	1.47886
WT HFD vs WT NCD	ko00590	Arachidonic acid metabolism	0.0184162	0.0289718	2.78042	1.88444
WT HFD vs WT NCD	ko00565	Ether lipid metabolism	0.0184162	0.0289718	-2.73361	1.79369
WT HFD vs WT NCD	ko05231	Choline metabolism in cancer	0.0184162	0.0289718	2.47226	1.6258
WT HFD vs WT NCD	ko00281	Geraniol degradation	0.0268091	0.0404489	-2.96742	1.88665
WT HFD vs WT NCD	ko04151	PI3K-Akt signaling pathway	0.0268091	0.0404489	2.38883	1.89229
WT HFD vs WT NCD	ko04612	Antigen processing and presentation	0.0268091	0.0404489	2.39038	1.89281
WT HFD vs WT NCD	ko04914	Progesterone-mediated oocyte maturation	0.0268091	0.0404489	2.39038	1.89281
WT HFD vs WT NCD	ko04915	Estrogen signaling pathway	0.0268091	0.0404489	2.39038	1.89281
WT HFD vs WT NCD	ko05215	Prostate cancer	0.0268091	0.0404489	2.39038	1.89281
WT HFD vs WT NCD	ko05133	Pertussis	0.0268091	0.0404489	-4.8445	2.36407
FPR1 HFD vs WT HFD	ko00633	Nitrotoluene degradation	0.000760306	0.0142829	-4.17867	1.83161
FPR1 HFD vs WT HFD	ko00531	Glycosaminoglycan degradation	0.000760306	0.0142829	2.88686	1.26547
FPR1 HFD vs WT HFD	ko00930	Caprolactam degradation	0.000760306	0.0142829	3.55475	2.07477
FPR1 HFD vs WT HFD	ko00540	Lipopolysaccharide biosynthesis	0.000760306	0.0142829	3.72319	1.52206
FPR1 HFD vs WT HFD	ko00604	Glycosphingolipid biosynthesis - ganglio series	0.000760306	0.0142829	4.08348	1.55738
FPR1 HFD vs WT HFD	ko00791	Atrazine degradation	0.000760306	0.0142829	4.18532	1.70866
FPR1 HFD vs WT HFD	ko00281	Geraniol degradation	0.000760306	0.0142829	4.75615	1.82657
FPR1 HFD vs WT HFD	ko05014	Amyotrophic lateral sclerosis (ALS)	0.000760306	0.0142829	5.58493	1.91852
FPR1 HFD vs WT HFD	ko00623	Toluene degradation	0.000760306	0.0142829	7.0171	1.49423
FPR1 HFD vs WT HFD	ko05133	Pertussis	0.000760306	0.0142829	7.43287	1.39458
FPR1 HFD vs WT HFD	ko00510	N-Glycan biosynthesis	0.000760306	0.0142829	7.78628	1.77915
FPR1 HFD vs WT HFD	ko04920	Adipocytokine signaling pathway	0.000760306	0.0142829	8.12809	1.83815
FPR1 HFD vs WT HFD	ko04210	Apoptosis	0.000760306	0.0142829	8.41475	2.22962
FPR1 HFD vs WT HFD	ko04974	Protein digestion and absorption	0.000760306	0.0142829	8.74157	1.74987
FPR1 HFD vs WT HFD	ko04142	Lysosome	0.00151562	0.0265739	2.42021	1.29505
FPR1 HFD vs WT HFD	ko04068	FoxO signaling pathway	0.00291564	0.0403585	1.46572	1.49717
FPR1 HFD vs WT HFD	ko04011	MAPK signaling pathway - yeast	0.00291564	0.0403585	1.84133	1.50322
FPR1 HFD vs WT HFD	ko00140	Steroid hormone biosynthesis	0.00291564	0.0403585	1.90326	1.50725
FPR1 HFD vs WT HFD	ko00785	Lipoic acid metabolism	0.00291564	0.0403585	2.08251	1.4422
FPR1 HFD vs WT HFD	ko02030	Bacterial chemotaxis	0.00399058	0.0499773	-2.07681	1.27923
FPR1 HFD vs WT HFD	ko03320	PPAR signaling pathway	0.00399058	0.0499773	1.50736	1.14977
