# Supplementary material for: Microbiota-Produced N-Formyl Peptide fMLF Promotes Obesity-Induced Glucose Intolerance
Source: Oxford University Press journal article supplement (doi:10.2337/db18-1307), 2019-04-22
Supplement: db181307supplementarydata6.xlsx [file db181307supplementarydata6.xlsx]

## Sheet: Functional Gene Composition
Supplementary Table 5. Bacterial gene composition predicted as significantly altered depending upon diet or genotype. Inferred metagenomics analysis prediction of gene composition changes In WT HFD versus WT NCD mice or Fpr1-KO HFD versus WT HFD (comparison), ranked by p-value, with KEGG ortholog information (n = 6-10 mice per group). Significance was determined as a false discovery rate-correcte…
Comparison	KEGG Orthology	KEGG Enzyme/Protein Information	p value	Adjusted p value	log2FoldChange	SD
WT HFD vs WT NCD	K00001	E1.1.1.1, adh; alcohol dehydrogenase [EC:1.1.1.1]	0.00340524	0.0207238	3.90363	1.53194
WT HFD vs WT NCD	K00003	E1.1.1.3; homoserine dehydrogenase [EC:1.1.1.3]	0.00534099	0.0207238	4.91245	2.68723
WT HFD vs WT NCD	K00004	BDH, butB; (R,R)-butanediol dehydrogenase / meso-butanediol dehydrogenase / diacetyl reductase [EC:1.1.1.4 1.1.1.- 1.1.1.303]	0.00340524	0.0207238	9.77638	1.45935
WT HFD vs WT NCD	K00009	mtlD; mannitol-1-phosphate 5-dehydrogenase [EC:1.1.1.17]	0.00340524	0.0207238	5.72952	1.51427
WT HFD vs WT NCD	K00012	UGDH, ugd; UDPglucose 6-dehydrogenase [EC:1.1.1.22]	0.00534099	0.0207238	2.77577	1.62197
WT HFD vs WT NCD	K00013	hisD; histidinol dehydrogenase [EC:1.1.1.23]	0.00340524	0.0207238	2.98567	1.17731
WT HFD vs WT NCD	K00014	aroE; shikimate dehydrogenase [EC:1.1.1.25]	0.00340524	0.0207238	3.51825	1.09158
WT HFD vs WT NCD	K00016	LDH, ldh; L-lactate dehydrogenase [EC:1.1.1.27]	0.00534099	0.0207238	5.67204	3.7407
WT HFD vs WT NCD	K00020	E1.1.1.31, mmsB; 3-hydroxyisobutyrate dehydrogenase [EC:1.1.1.31]	0.00340524	0.0207238	7.99707	1.72472
WT HFD vs WT NCD	K00027	ME2, sfcA, maeA; malate dehydrogenase (oxaloacetate-decarboxylating) [EC:1.1.1.38]	0.00340524	0.0207238	6.30484	1.55881
WT HFD vs WT NCD	K00031	IDH1, IDH2, icd; isocitrate dehydrogenase [EC:1.1.1.42]	0.00340524	0.0207238	3.17241	1.21849
WT HFD vs WT NCD	K00033	PGD, gnd, gntZ; 6-phosphogluconate dehydrogenase [EC:1.1.1.44 1.1.1.343]	0.00534099	0.0207238	4.60651	2.82159
WT HFD vs WT NCD	K00036	G6PD, zwf; glucose-6-phosphate 1-dehydrogenase [EC:1.1.1.49]	0.00534099	0.0207238	4.53874	2.81962
WT HFD vs WT NCD	K00040	uxuB; fructuronate reductase [EC:1.1.1.57]	0.00340524	0.0207238	10.1719	1.63748
WT HFD vs WT NCD	K00052	leuB; 3-isopropylmalate dehydrogenase [EC:1.1.1.85]	0.00340524	0.0207238	2.9871	1.1772
WT HFD vs WT NCD	K00053	ilvC; ketol-acid reductoisomerase [EC:1.1.1.86]	0.00340524	0.0207238	3.12387	1.20196
WT HFD vs WT NCD	K00054	mvaA; hydroxymethylglutaryl-CoA reductase [EC:1.1.1.88]	0.00534099	0.0207238	5.69224	3.74585
WT HFD vs WT NCD	K00057	gpsA; glycerol-3-phosphate dehydrogenase (NAD(P)+) [EC:1.1.1.94]	0.00534099	0.0207238	4.56727	2.79057
WT HFD vs WT NCD	K00058	serA, PHGDH; D-3-phosphoglycerate dehydrogenase [EC:1.1.1.95]	0.00340524	0.0207238	3.04358	1.20989
WT HFD vs WT NCD	K00059	fabG; 3-oxoacyl-[acyl-carrier protein] reductase [EC:1.1.1.100]	0.00534099	0.0207238	3.82078	2.15737
WT HFD vs WT NCD	K00067	rfbD, rmlD; dTDP-4-dehydrorhamnose reductase [EC:1.1.1.133]	0.00534099	0.0207238	3.61613	2.11293
WT HFD vs WT NCD	K00075	murB; UDP-N-acetylmuramate dehydrogenase [EC:1.3.1.98]	0.00534099	0.0207238	4.5048	2.75181
WT HFD vs WT NCD	K00088	guaB; IMP dehydrogenase [EC:1.1.1.205]	0.00534099	0.0207238	4.2107	2.62282
WT HFD vs WT NCD	K00100	E1.1.1.-	0.00534099	0.0207238	6.07736	3.93207
WT HFD vs WT NCD	K00111	glpA, glpD; glycerol-3-phosphate dehydrogenase [EC:1.1.5.3]	0.00340524	0.0207238	5.65466	1.53824
WT HFD vs WT NCD	K00124	fdoH; formate dehydrogenase iron-sulfur subunit	0.00340524	0.0207238	4.65676	2.1595
WT HFD vs WT NCD	K00133	asd; aspartate-semialdehyde dehydrogenase [EC:1.2.1.11]	0.00534099	0.0207238	4.38093	2.65568
WT HFD vs WT NCD	K00134	GAPDH, gapA; glyceraldehyde 3-phosphate dehydrogenase [EC:1.2.1.12]	0.00534099	0.0207238	4.57104	2.75228
WT HFD vs WT NCD	K00135	gabD; succinate-semialdehyde dehydrogenase / glutarate-semialdehyde dehydrogenase [EC:1.2.1.16 1.2.1.79 1.2.1.20]	0.00534099	0.0207238	5.60825	3.73508
WT HFD vs WT NCD	K00145	argC; N-acetyl-gamma-glutamyl-phosphate reductase [EC:1.2.1.38]	0.00340524	0.0207238	2.98745	1.1775
WT HFD vs WT NCD	K00147	proA; glutamate-5-semialdehyde dehydrogenase [EC:1.2.1.41]	0.00340524	0.0207238	2.91612	1.13513
WT HFD vs WT NCD	K00158	E1.2.3.3, poxL; pyruvate oxidase [EC:1.2.3.3]	0.00534099	0.0207238	5.81555	3.83602
WT HFD vs WT NCD	K00161	PDHA, pdhA; pyruvate dehydrogenase E1 component alpha subunit [EC:1.2.4.1]	0.00340524	0.0207238	5.43929	1.78351
WT HFD vs WT NCD	K00162	PDHB, pdhB; pyruvate dehydrogenase E1 component beta subunit [EC:1.2.4.1]	0.00340524	0.0207238	5.43929	1.78351
WT HFD vs WT NCD	K00169	porA; pyruvate ferredoxin oxidoreductase alpha subunit [EC:1.2.7.1]	0.00340524	0.0207238	Inf	NA
WT HFD vs WT NCD	K00170	porB; pyruvate ferredoxin oxidoreductase beta subunit [EC:1.2.7.1]	0.00323167	0.0207238	Inf	NA
WT HFD vs WT NCD	K00172	porG; pyruvate ferredoxin oxidoreductase gamma subunit [EC:1.2.7.1]	0.00340524	0.0207238	Inf	NA
WT HFD vs WT NCD	K00184	K00184; prokaryotic molybdopterin-containing oxidoreductase family, iron-sulfur binding subunit	0.00323167	0.0207238	Inf	NA
WT HFD vs WT NCD	K00185	K00185; prokaryotic molybdopterin-containing oxidoreductase family, membrane subunit	0.00323167	0.0207238	Inf	NA
WT HFD vs WT NCD	K00215	dapB; 4-hydroxy-tetrahydrodipicolinate reductase [EC:1.17.1.8]	0.00534099	0.0207238	4.27154	2.59883
WT HFD vs WT NCD	K00219	fadH; 2,4-dienoyl-CoA reductase (NADPH2) [EC:1.3.1.34]	0.00336134	0.0207238	Inf	NA
WT HFD vs WT NCD	K00226	pyrD; dihydroorotate dehydrogenase (fumarate) [EC:1.3.98.1]	0.00534099	0.0207238	4.58286	2.84182
WT HFD vs WT NCD	K00240	sdhB, frdB; succinate dehydrogenase / fumarate reductase, iron-sulfur subunit [EC:1.3.5.1 1.3.5.4]	0.00340524	0.0207238	-5.64231	1.7033
WT HFD vs WT NCD	K00243	K00243; hypothetical protein	0.00534099	0.0207238	4.60508	2.79389
WT HFD vs WT NCD	K00244	frdA; fumarate reductase flavoprotein subunit [EC:1.3.5.4]	0.00534099	0.0207238	5.86156	3.94856
WT HFD vs WT NCD	K00245	frdB; fumarate reductase iron-sulfur subunit [EC:1.3.5.4]	0.00422206	0.0207238	4.31285	2.2438
WT HFD vs WT NCD	K00266	gltD; glutamate synthase (NADPH/NADH) small chain [EC:1.4.1.13 1.4.1.14]	0.00340524	0.0207238	3.0996	1.15423
WT HFD vs WT NCD	K00286	proC; pyrroline-5-carboxylate reductase [EC:1.5.1.2]	0.00340524	0.0207238	2.91687	1.18139
WT HFD vs WT NCD	K00287	folA; dihydrofolate reductase [EC:1.5.1.3]	0.00534099	0.0207238	4.58809	2.80424
WT HFD vs WT NCD	K00297	metF, MTHFR; methylenetetrahydrofolate reductase (NADPH) [EC:1.5.1.20]	0.00534099	0.0207238	2.5278	1.22954
WT HFD vs WT NCD	K00298	ceo; N5-(carboxyethyl)ornithine synthase [EC:1.5.1.24]	0.00323167	0.0207238	Inf	NA
WT HFD vs WT NCD	K00313	fixC; electron transfer flavoprotein-quinone oxidoreductase [EC:1.5.5.-]	0.00336134	0.0207238	Inf	NA
WT HFD vs WT NCD	K00364	E1.7.1.7, guaC; GMP reductase [EC:1.7.1.7]	0.00534099	0.0207238	5.69649	3.75235
WT HFD vs WT NCD	K00375	K00375; GntR family transcriptional regulator / MocR family aminotransferase	0.00340524	0.0207238	5.87088	2.01184
WT HFD vs WT NCD	K00383	GSR, gor; glutathione reductase (NADPH) [EC:1.8.1.7]	0.00534099	0.0207238	5.68074	3.73334
WT HFD vs WT NCD	K00384	trxB; thioredoxin reductase (NADPH) [EC:1.8.1.9]	0.00534099	0.0207238	4.83153	3.00891
WT HFD vs WT NCD	K00425	cydA; cytochrome d ubiquinol oxidase subunit I [EC:1.10.3.-]	0.00534099	0.0207238	4.53323	2.79353
WT HFD vs WT NCD	K00426	cydB; cytochrome d ubiquinol oxidase subunit II [EC:1.10.3.-]	0.00534099	0.0207238	4.53323	2.79353
WT HFD vs WT NCD	K00525	E1.17.4.1A, nrdA, nrdE; ribonucleoside-diphosphate reductase alpha chain [EC:1.17.4.1]	0.00534099	0.0207238	2.36321	1.41145
WT HFD vs WT NCD	K00526	E1.17.4.1B, nrdB, nrdF; ribonucleoside-diphosphate reductase beta chain [EC:1.17.4.1]	0.00534099	0.0207238	4.55356	2.82841
WT HFD vs WT NCD	K00527	nrdD; ribonucleoside-triphosphate reductase [EC:1.17.4.2]	0.00534099	0.0207238	4.15981	2.52369
WT HFD vs WT NCD	K00537	ARSC1, arsC; arsenate reductase [EC:1.20.4.1]	0.00534099	0.0207238	5.08874	3.16256
WT HFD vs WT NCD	K00540	E1.-.-.-	0.00340524	0.0207238	3.92691	1.61499
WT HFD vs WT NCD	K00548	metH, MTR; 5-methyltetrahydrofolate--homocysteine methyltransferase [EC:2.1.1.13]	0.00340524	0.0207238	3.46048	1.43258
WT HFD vs WT NCD	K00549	metE; 5-methyltetrahydropteroyltriglutamate--homocysteine methyltransferase [EC:2.1.1.14]	0.00534099	0.0207238	5.62843	2.94807
WT HFD vs WT NCD	K00554	trmD; tRNA (guanine37-N1)-methyltransferase [EC:2.1.1.228]	0.00534099	0.0207238	4.5002	2.74884
WT HFD vs WT NCD	K00560	thyA, TYMS; thymidylate synthase [EC:2.1.1.45]	0.00534099	0.0207238	4.51278	2.80226
WT HFD vs WT NCD	K00561	ermC, ermA; 23S rRNA (adenine-N6)-dimethyltransferase [EC:2.1.1.184]	0.00534099	0.0207238	5.93286	4.02385
WT HFD vs WT NCD	K00563	rlmA1; 23S rRNA (guanine745-N1)-methyltransferase [EC:2.1.1.187]	0.00340524	0.0207238	5.45914	2.51694
WT HFD vs WT NCD	K00564	rsmC; 16S rRNA (guanine1207-N2)-methyltransferase [EC:2.1.1.172]	0.00534099	0.0207238	5.98061	3.98348
WT HFD vs WT NCD	K00566	mnmA, trmU, TRMU; tRNA-specific 2-thiouridylase [EC:2.8.1.-]	0.00534099	0.0207238	3.78126	2.25725
WT HFD vs WT NCD	K00567	ogt, MGMT; methylated-DNA-[protein]-cysteine S-methyltransferase [EC:2.1.1.63]	0.00534099	0.0207238	3.25413	2.01593
WT HFD vs WT NCD	K00571	E2.1.1.72; site-specific DNA-methyltransferase (adenine-specific) [EC:2.1.1.72]	0.00534099	0.0207238	5.12226	2.99431
WT HFD vs WT NCD	K00574	E2.1.1.79, cfa; cyclopropane-fatty-acyl-phospholipid synthase [EC:2.1.1.79]	0.00534099	0.0207238	5.76069	3.9044
WT HFD vs WT NCD	K00600	glyA, SHMT; glycine hydroxymethyltransferase [EC:2.1.2.1]	0.00534099	0.0207238	4.51233	2.73847
WT HFD vs WT NCD	K00602	purH; phosphoribosylaminoimidazolecarboxamide formyltransferase / IMP cyclohydrolase [EC:2.1.2.3 3.5.4.10]	0.00534099	0.0207238	2.40191	1.2676
WT HFD vs WT NCD	K00604	MTFMT, fmt; methionyl-tRNA formyltransferase [EC:2.1.2.9]	0.00534099	0.0207238	4.50034	2.74893
WT HFD vs WT NCD	K00609	pyrB, PYR2; aspartate carbamoyltransferase catalytic subunit [EC:2.1.3.2]	0.00534099	0.0207238	4.5902	2.80418
WT HFD vs WT NCD	K00611	OTC, argF, argI; ornithine carbamoyltransferase [EC:2.1.3.3]	0.00340524	0.0207238	5.91388	2.06947
WT HFD vs WT NCD	K00613	GATM; glycine amidinotransferase [EC:2.1.4.1]	0.00323167	0.0207238	Inf	NA
WT HFD vs WT NCD	K00615	E2.2.1.1, tktA, tktB; transketolase [EC:2.2.1.1]	0.00340524	0.0207238	3.33815	1.12009
WT HFD vs WT NCD	K00620	argJ; glutamate N-acetyltransferase / amino-acid N-acetyltransferase [EC:2.3.1.35 2.3.1.1]	0.00340524	0.0207238	6.63739	2.92192
WT HFD vs WT NCD	K00625	E2.3.1.8, pta; phosphate acetyltransferase [EC:2.3.1.8]	0.00534099	0.0207238	4.62571	2.80862
WT HFD vs WT NCD	K00626	E2.3.1.9, atoB; acetyl-CoA C-acetyltransferase [EC:2.3.1.9]	0.00534099	0.0207238	5.62172	3.60257
WT HFD vs WT NCD	K00627	DLAT, aceF, pdhC; pyruvate dehydrogenase E2 component (dihydrolipoamide acetyltransferase) [EC:2.3.1.12]	0.00340524	0.0207238	5.38033	1.74858
WT HFD vs WT NCD	K00640	cysE; serine O-acetyltransferase [EC:2.3.1.30]	0.00534099	0.0207238	3.24573	1.69785
WT HFD vs WT NCD	K00645	fabD; [acyl-carrier-protein] S-malonyltransferase [EC:2.3.1.39]	0.00340524	0.0207238	3.32522	1.52846
WT HFD vs WT NCD	K00655	plsC; 1-acyl-sn-glycerol-3-phosphate acyltransferase [EC:2.3.1.51]	0.00534099	0.0207238	4.67579	2.81989
WT HFD vs WT NCD	K00657	speG; diamine N-acetyltransferase [EC:2.3.1.57]	0.00534099	0.0207238	4.49913	2.76972
WT HFD vs WT NCD	K00661	maa; maltose O-acetyltransferase [EC:2.3.1.79]	0.00534099	0.0207238	4.30935	2.66265
WT HFD vs WT NCD	K00662	aacC; aminoglycoside 3-N-acetyltransferase [EC:2.3.1.81]	0.00534099	0.0207238	5.97412	4.02093
WT HFD vs WT NCD	K00674	dapD; 2,3,4,5-tetrahydropyridine-2-carboxylate N-succinyltransferase [EC:2.3.1.117]	0.00534099	0.0207238	3.62634	1.76294
WT HFD vs WT NCD	K00680	E2.3.1.-	0.00340524	0.0207238	5.80889	1.74081
WT HFD vs WT NCD	K00687	pbp2B, penA; penicillin-binding protein 2B [EC:2.3.2.-]	0.00340524	0.0207238	9.80414	1.54289
WT HFD vs WT NCD	K00688	E2.4.1.1, glgP, PYG; starch phosphorylase [EC:2.4.1.1]	0.00340524	0.0207238	3.16448	1.13766
WT HFD vs WT NCD	K00690	E2.4.1.7; sucrose phosphorylase [EC:2.4.1.7]	0.00534099	0.0207238	5.76793	3.87216
WT HFD vs WT NCD	K00691	E2.4.1.8, mapA; maltose phosphorylase [EC:2.4.1.8]	0.00534099	0.0207238	4.92832	3.08259
WT HFD vs WT NCD	K00692	sacB; levansucrase [EC:2.4.1.10]	0.00534099	0.0207238	5.91897	4.00754
WT HFD vs WT NCD	K00700	glgB; 1,4-alpha-glucan branching enzyme [EC:2.4.1.18]	0.00340524	0.0207238	2.54629	1.05088
WT HFD vs WT NCD	K00703	E2.4.1.21, glgA; starch synthase [EC:2.4.1.21]	0.00340524	0.0207238	4.08443	1.60473
WT HFD vs WT NCD	K00705	malQ; 4-alpha-glucanotransferase [EC:2.4.1.25]	0.00340524	0.0207238	3.00925	1.01352
WT HFD vs WT NCD	K00712	tagE; poly(glycerol-phosphate) alpha-glucosyltransferase [EC:2.4.1.52]	0.00340524	0.0207238	5.1306	2.77511
WT HFD vs WT NCD	K00721	DPM1; dolichol-phosphate mannosyltransferase [EC:2.4.1.83]	0.00340524	0.0207238	-5.98059	1.97244
WT HFD vs WT NCD	K00754	E2.4.1.-	0.00534099	0.0207238	5.93303	4.02398
WT HFD vs WT NCD	K00756	E2.4.2.2, pdp; pyrimidine-nucleoside phosphorylase [EC:2.4.2.2]	0.00340524	0.0207238	6.16549	1.47248
WT HFD vs WT NCD	K00759	APRT, apt; adenine phosphoribosyltransferase [EC:2.4.2.7]	0.00534099	0.0207238	4.61702	2.86561
WT HFD vs WT NCD	K00760	hprT, hpt, HPRT1; hypoxanthine phosphoribosyltransferase [EC:2.4.2.8]	0.00534099	0.0207238	4.85534	3.03672
WT HFD vs WT NCD	K00761	upp, UPRT; uracil phosphoribosyltransferase [EC:2.4.2.9]	0.00534099	0.0207238	4.50072	2.74892
WT HFD vs WT NCD	K00762	pyrE; orotate phosphoribosyltransferase [EC:2.4.2.10]	0.00534099	0.0207238	4.42631	2.74681
WT HFD vs WT NCD	K00763	pncB, NAPRT1; nicotinate phosphoribosyltransferase [EC:6.3.4.21]	0.00534099	0.0207238	5.01206	3.11924
WT HFD vs WT NCD	K00765	hisG; ATP phosphoribosyltransferase [EC:2.4.2.17]	0.00340524	0.0207238	2.51235	1.07995
WT HFD vs WT NCD	K00766	trpD; anthranilate phosphoribosyltransferase [EC:2.4.2.18]	0.00340524	0.0207238	3.14541	1.20253
WT HFD vs WT NCD	K00773	tgt, QTRT1; queuine tRNA-ribosyltransferase [EC:2.4.2.29]	0.00340524	0.0207238	2.86693	1.15486
WT HFD vs WT NCD	K00783	rlmH; 23S rRNA (pseudouridine1915-N3)-methyltransferase [EC:2.1.1.177]	0.00534099	0.0207238	4.49774	2.74884
WT HFD vs WT NCD	K00784	rnz; ribonuclease Z [EC:3.1.26.11]	0.00534099	0.0207238	4.60215	2.79249
WT HFD vs WT NCD	K00786	E2.4.-.-	0.00340524	0.0207238	Inf	NA
WT HFD vs WT NCD	K00788	thiE; thiamine-phosphate pyrophosphorylase [EC:2.5.1.3]	0.00340524	0.0207238	3.32466	1.78639
WT HFD vs WT NCD	K00789	metK; S-adenosylmethionine synthetase [EC:2.5.1.6]	0.00534099	0.0207238	4.49908	2.74748
WT HFD vs WT NCD	K00790	murA; UDP-N-acetylglucosamine 1-carboxyvinyltransferase [EC:2.5.1.7]	0.00534099	0.0207238	4.49527	2.70959
WT HFD vs WT NCD	K00791	miaA, TRIT1; tRNA dimethylallyltransferase [EC:2.5.1.75]	0.00534099	0.0207238	4.06288	2.45841
WT HFD vs WT NCD	K00794	ribH, RIB4; 6,7-dimethyl-8-ribityllumazine synthase [EC:2.5.1.78]	0.00340524	0.0207238	3.50162	1.81983
WT HFD vs WT NCD	K00798	MMAB, pduO; cob(I)alamin adenosyltransferase [EC:2.5.1.17]	0.00340524	0.0207238	-3.60851	2.07481
WT HFD vs WT NCD	K00800	aroA; 3-phosphoshikimate 1-carboxyvinyltransferase [EC:2.5.1.19]	0.00340524	0.0207238	2.97436	1.17093
WT HFD vs WT NCD	K00805	hepST; heptaprenyl diphosphate synthase [EC:2.5.1.30]	0.00534099	0.0207238	5.76518	3.71421
WT HFD vs WT NCD	K00806	uppS; undecaprenyl diphosphate synthase [EC:2.5.1.31]	0.00534099	0.0207238	4.50069	2.74906
WT HFD vs WT NCD	K00812	aspB; aspartate aminotransferase [EC:2.6.1.1]	0.00340524	0.0207238	-6.16693	2.07688
WT HFD vs WT NCD	K00817	hisC; histidinol-phosphate aminotransferase [EC:2.6.1.9]	0.00340524	0.0207238	3.13644	1.25794
WT HFD vs WT NCD	K00820	glmS, GFPT; glucosamine--fructose-6-phosphate aminotransferase (isomerizing) [EC:2.6.1.16]	0.00534099	0.0207238	4.62817	2.83686
WT HFD vs WT NCD	K00821	argD; acetylornithine/N-succinyldiaminopimelate aminotransferase [EC:2.6.1.11 2.6.1.17]	0.00534099	0.0207238	7.64297	3.84657
WT HFD vs WT NCD	K00826	E2.6.1.42, ilvE; branched-chain amino acid aminotransferase [EC:2.6.1.42]	0.00340524	0.0207238	3.11239	1.20155
WT HFD vs WT NCD	K00831	serC, PSAT1; phosphoserine aminotransferase [EC:2.6.1.52]	0.00340524	0.0207238	3.02588	1.14835
WT HFD vs WT NCD	K00837	E2.6.1.-	0.00340524	0.0207238	4.10288	1.74778
WT HFD vs WT NCD	K00839	pucG; (S)-ureidoglycine-glyoxylate aminotransferase [EC:2.6.1.-]	0.00340524	0.0207238	7.69602	2.38547
WT HFD vs WT NCD	K00841	patA; aminotransferase [EC:2.6.1.-]	0.00534099	0.0207238	5.5404	3.71041
WT HFD vs WT NCD	K00844	HK; hexokinase [EC:2.7.1.1]	0.00327456	0.0207238	#VALUE!	NA
WT HFD vs WT NCD	K00845	glk; glucokinase [EC:2.7.1.2]	0.00340524	0.0207238	3.50732	1.37268
WT HFD vs WT NCD	K00847	E2.7.1.4, scrK; fructokinase [EC:2.7.1.4]	0.00534099	0.0207238	4.05418	2.45372
WT HFD vs WT NCD	K00849	galK; galactokinase [EC:2.7.1.6]	0.00534099	0.0207238	4.50385	2.74968
WT HFD vs WT NCD	K00850	pfkA, PFK; 6-phosphofructokinase 1 [EC:2.7.1.11]	0.00534099	0.0207238	3.83534	2.21452
WT HFD vs WT NCD	K00851	E2.7.1.12, gntK, idnK; gluconokinase [EC:2.7.1.12]	0.00534099	0.0207238	5.56582	3.68226
WT HFD vs WT NCD	K00852	rbsK, RBKS; ribokinase [EC:2.7.1.15]	0.00534099	0.0207238	4.71644	2.95906
WT HFD vs WT NCD	K00854	xylB, XYLB; xylulokinase [EC:2.7.1.17]	0.00340524	0.0207238	2.61314	1.1481
WT HFD vs WT NCD	K00857	tdk, TK; thymidine kinase [EC:2.7.1.21]	0.00534099	0.0207238	4.43964	2.73643
WT HFD vs WT NCD	K00858	ppnK, NADK; NAD+ kinase [EC:2.7.1.23]	0.00534099	0.0207238	4.50063	2.74905
WT HFD vs WT NCD	K00859	coaE; dephospho-CoA kinase [EC:2.7.1.24]	0.00534099	0.0207238	4.5002	2.74884
WT HFD vs WT NCD	K00863	E2.7.1.29, DAK1, DAK2; dihydroxyacetone kinase [EC:2.7.1.29]	0.00336134	0.0207238	Inf	NA
WT HFD vs WT NCD	K00864	glpK, GK; glycerol kinase [EC:2.7.1.30]	0.00340524	0.0207238	4.17852	1.65114
WT HFD vs WT NCD	K00865	glxK; glycerate kinase [EC:2.7.1.31]	0.00534099	0.0207238	5.60612	3.58099
WT HFD vs WT NCD	K00867	coaA; type I pantothenate kinase [EC:2.7.1.33]	0.00534099	0.0207238	5.82076	3.90707
WT HFD vs WT NCD	K00868	pdxK, pdxY; pyridoxine kinase [EC:2.7.1.35]	0.00534099	0.0207238	4.59811	2.85165
WT HFD vs WT NCD	K00869	E2.7.1.36, MVK, mvaK1; mevalonate kinase [EC:2.7.1.36]	0.00534099	0.0207238	5.69225	3.74585
WT HFD vs WT NCD	K00872	thrB1; homoserine kinase [EC:2.7.1.39]	0.00534099	0.0207238	5.30033	3.1846
WT HFD vs WT NCD	K00873	PK, pyk; pyruvate kinase [EC:2.7.1.40]	0.00534099	0.0207238	4.4965	2.747
WT HFD vs WT NCD	K00874	kdgK; 2-dehydro-3-deoxygluconokinase [EC:2.7.1.45]	0.00340524	0.0207238	3.20716	1.95724
WT HFD vs WT NCD	K00876	udk, UCK; uridine kinase [EC:2.7.1.48]	0.00534099	0.0207238	4.07791	2.40609
WT HFD vs WT NCD	K00878	thiM; hydroxyethylthiazole kinase [EC:2.7.1.50]	0.00340524	0.0207238	5.37031	2.08945
WT HFD vs WT NCD	K00882	fruK; 1-phosphofructokinase [EC:2.7.1.56]	0.00534099	0.0207238	5.89903	3.91858
WT HFD vs WT NCD	K00891	E2.7.1.71, aroK, aroL; shikimate kinase [EC:2.7.1.71]	0.00340524	0.0207238	3.96662	1.43663
WT HFD vs WT NCD	K00897	aphA; kanamycin kinase [EC:2.7.1.95]	0.00534099	0.0207238	5.99889	4.01874
WT HFD vs WT NCD	K00917	lacC; tagatose 6-phosphate kinase [EC:2.7.1.144]	0.00534099	0.0207238	5.95924	3.99838
WT HFD vs WT NCD	K00924	E2.7.1.-	0.00336134	0.0207238	Inf	NA
WT HFD vs WT NCD	K00925	ackA; acetate kinase [EC:2.7.2.1]	0.00534099	0.0207238	4.89088	3.03511
WT HFD vs WT NCD	K00926	arcC; carbamate kinase [EC:2.7.2.2]	0.00340524	0.0207238	7.67929	1.85616
WT HFD vs WT NCD	K00927	PGK, pgk; phosphoglycerate kinase [EC:2.7.2.3]	0.00534099	0.0207238	4.52774	2.76498
WT HFD vs WT NCD	K00928	lysC; aspartate kinase [EC:2.7.2.4]	0.00534099	0.0207238	3.82126	2.36964
WT HFD vs WT NCD	K00930	argB; acetylglutamate kinase [EC:2.7.2.8]	0.00340524	0.0207238	2.98743	1.1775
WT HFD vs WT NCD	K00931	proB; glutamate 5-kinase [EC:2.7.2.11]	0.00340524	0.0207238	2.91612	1.13513
WT HFD vs WT NCD	K00936	E2.7.3.-	0.00534099	0.0207238	4.2168	2.04317
WT HFD vs WT NCD	K00938	E2.7.4.2, mvaK2; phosphomevalonate kinase [EC:2.7.4.2]	0.00534099	0.0207238	5.69224	3.74585
WT HFD vs WT NCD	K00939	adk, AK; adenylate kinase [EC:2.7.4.3]	0.00534099	0.0207238	4.4993	2.74827
WT HFD vs WT NCD	K00941	thiD; hydroxymethylpyrimidine/phosphomethylpyrimidine kinase [EC:2.7.1.49 2.7.4.7]	0.00534099	0.0207238	4.56489	2.77427
WT HFD vs WT NCD	K00942	E2.7.4.8, gmk; guanylate kinase [EC:2.7.4.8]	0.00534099	0.0207238	4.89497	3.0354
WT HFD vs WT NCD	K00943	tmk, DTYMK; dTMP kinase [EC:2.7.4.9]	0.00534099	0.0207238	5.2901	3.39635
WT HFD vs WT NCD	K00945	cmk; cytidylate kinase [EC:2.7.4.14]	0.00534099	0.0207238	4.5127	2.73526
WT HFD vs WT NCD	K00948	PRPS, prsA; ribose-phosphate pyrophosphokinase [EC:2.7.6.1]	0.00534099	0.0207238	4.884	3.04066
WT HFD vs WT NCD	K00949	thiN, TPK1, THI80; thiamine pyrophosphokinase [EC:2.7.6.2]	0.00534099	0.0207238	4.51813	2.77159
WT HFD vs WT NCD	K00951	relA; GTP pyrophosphokinase [EC:2.7.6.5]	0.00534099	0.0207238	3.99807	2.41914
WT HFD vs WT NCD	K00954	E2.7.7.3A, coaD, kdtB; pantetheine-phosphate adenylyltransferase [EC:2.7.7.3]	0.00534099	0.0207238	4.5002	2.74884
WT HFD vs WT NCD	K00962	pnp, PNPT1; polyribonucleotide nucleotidyltransferase [EC:2.7.7.8]	0.00340524	0.0207238	2.97422	1.17085
WT HFD vs WT NCD	K00963	UGP2, galU, galF; UTP--glucose-1-phosphate uridylyltransferase [EC:2.7.7.9]	0.00534099	0.0207238	5.5495	3.61049
WT HFD vs WT NCD	K00965	galT, GALT; UDPglucose--hexose-1-phosphate uridylyltransferase [EC:2.7.7.12]	0.00534099	0.0207238	5.74402	3.75157
WT HFD vs WT NCD	K00969	nadD; nicotinate-nucleotide adenylyltransferase [EC:2.7.7.18]	0.00534099	0.0207238	4.53241	2.74968
WT HFD vs WT NCD	K00970	pcnB; poly(A) polymerase [EC:2.7.7.19]	0.00340524	0.0207238	-4.71813	2.67146
WT HFD vs WT NCD	K00973	E2.7.7.24, rfbA, rffH; glucose-1-phosphate thymidylyltransferase [EC:2.7.7.24]	0.00534099	0.0207238	3.41599	2.04942
WT HFD vs WT NCD	K00974	cca; tRNA nucleotidyltransferase (CCA-adding enzyme) [EC:2.7.7.72 3.1.3.- 3.1.4.-]	0.00534099	0.0207238	5.7353	3.71367
WT HFD vs WT NCD	K00975	glgC; glucose-1-phosphate adenylyltransferase [EC:2.7.7.27]	0.00340524	0.0207238	7.68506	3.03528
WT HFD vs WT NCD	K00980	tagD; glycerol-3-phosphate cytidylyltransferase [EC:2.7.7.39]	0.00534099	0.0207238	5.81773	3.79785
WT HFD vs WT NCD	K00981	E2.7.7.41, CDS1, CDS2, cdsA; phosphatidate cytidylyltransferase [EC:2.7.7.41]	0.00534099	0.0207238	4.30599	2.61801
WT HFD vs WT NCD	K00995	pgsA, PGS1; CDP-diacylglycerol--glycerol-3-phosphate 3-phosphatidyltransferase [EC:2.7.8.5]	0.00534099	0.0207238	5.72789	3.69763
WT HFD vs WT NCD	K00997	acpS; holo-[acyl-carrier protein] synthase [EC:2.7.8.7]	0.00534099	0.0207238	5.65784	3.73982
WT HFD vs WT NCD	K01000	mraY; phospho-N-acetylmuramoyl-pentapeptide-transferase [EC:2.7.8.13]	0.00534099	0.0207238	4.49864	2.74822
WT HFD vs WT NCD	K01008	selD, SEPHS; selenide, water dikinase [EC:2.7.9.3]	0.00534099	0.0207238	7.57133	4.47902
WT HFD vs WT NCD	K01011	TST, MPST, sseA; thiosulfate/3-mercaptopyruvate sulfurtransferase [EC:2.8.1.1 2.8.1.2]	0.00534099	0.0207238	3.74667	2.14836
WT HFD vs WT NCD	K01048	pldB; lysophospholipase [EC:3.1.1.5]	0.00340524	0.0207238	7.97486	4.00365
WT HFD vs WT NCD	K01056	PTH1, pth, spoVC; peptidyl-tRNA hydrolase, PTH1 family [EC:3.1.1.29]	0.00534099	0.0207238	4.5002	2.74884
WT HFD vs WT NCD	K01057	PGLS, pgl, devB; 6-phosphogluconolactonase [EC:3.1.1.31]	0.00340524	0.0207238	-6.27306	2.24768
WT HFD vs WT NCD	K01071	MCH; medium-chain acyl-[acyl-carrier-protein] hydrolase [EC:3.1.2.21]	0.00534099	0.0207238	5.76145	3.88791
WT HFD vs WT NCD	K01081	E3.1.3.5; 5'-nucleotidase [EC:3.1.3.5]	0.00534099	0.0207238	2.88531	1.78064
WT HFD vs WT NCD	K01090	E3.1.3.16; protein phosphatase [EC:3.1.3.16]	0.00534099	0.0207238	4.93024	2.8643
WT HFD vs WT NCD	K01092	E3.1.3.25, IMPA, suhB; myo-inositol-1(or 4)-monophosphatase [EC:3.1.3.25]	0.00340524	0.0207238	2.8398	1.14044
WT HFD vs WT NCD	K01101	E3.1.3.41; 4-nitrophenyl phosphatase [EC:3.1.3.41]	0.00534099	0.0207238	5.82177	3.90746
WT HFD vs WT NCD	K01104	E3.1.3.48; protein-tyrosine phosphatase [EC:3.1.3.48]	0.00534099	0.0207238	5.16413	3.27573
WT HFD vs WT NCD	K01118	acpD, azoR; FMN-dependent NADH-azoreductase [EC:1.7.-.-]	0.00340524	0.0207238	9.89027	1.45475
WT HFD vs WT NCD	K01119	cpdB; 2',3'-cyclic-nucleotide 2'-phosphodiesterase / 3'-nucleotidase [EC:3.1.4.16 3.1.3.6]	0.00534099	0.0207238	4.60294	2.80118
WT HFD vs WT NCD	K01126	E3.1.4.46, glpQ, ugpQ; glycerophosphoryl diester phosphodiesterase [EC:3.1.4.46]	0.00534099	0.0207238	3.96995	2.26712
WT HFD vs WT NCD	K01129	dgt; dGTPase [EC:3.1.5.1]	0.00534099	0.0207238	2.66734	1.35278
WT HFD vs WT NCD	K01142	E3.1.11.2, xthA; exodeoxyribonuclease III [EC:3.1.11.2]	0.00534099	0.0207238	4.82287	3.01326
WT HFD vs WT NCD	K01153	hsdR; type I restriction enzyme, R subunit [EC:3.1.21.3]	0.00534099	0.0207238	2.43864	1.20155
WT HFD vs WT NCD	K01154	hsdS; type I restriction enzyme, S subunit [EC:3.1.21.3]	0.00340524	0.0207238	3.11727	1.08459
WT HFD vs WT NCD	K01156	res; type III restriction enzyme [EC:3.1.21.5]	0.00534099	0.0207238	5.04777	3.16691
WT HFD vs WT NCD	K01163	K01163; hypothetical protein	0.00534099	0.0207238	-5.86106	2.92886
WT HFD vs WT NCD	K01176	E3.2.1.1, amyA, malS; alpha-amylase [EC:3.2.1.1]	0.00340524	0.0207238	3.59571	1.46905
WT HFD vs WT NCD	K01179	E3.2.1.4; endoglucanase [EC:3.2.1.4]	0.00340524	0.0207238	5.48413	1.92094
WT HFD vs WT NCD	K01182	E3.2.1.10; oligo-1,6-glucosidase [EC:3.2.1.10]	0.00340524	0.0207238	6.01327	3.34567
WT HFD vs WT NCD	K01183	E3.2.1.14; chitinase [EC:3.2.1.14]	0.00534099	0.0207238	3.67619	2.00051
WT HFD vs WT NCD	K01187	malZ; alpha-glucosidase [EC:3.2.1.20]	0.00534099	0.0207238	3.93309	2.38515
WT HFD vs WT NCD	K01190	lacZ; beta-galactosidase [EC:3.2.1.23]	0.00534099	0.0207238	3.08218	1.79553
WT HFD vs WT NCD	K01191	E3.2.1.24; alpha-mannosidase [EC:3.2.1.24]	0.00340524	0.0207238	5.12439	1.08398
WT HFD vs WT NCD	K01193	E3.2.1.26, sacA; beta-fructofuranosidase [EC:3.2.1.26]	0.00534099	0.0207238	5.75864	3.8437
WT HFD vs WT NCD	K01198	xynB; xylan 1,4-beta-xylosidase [EC:3.2.1.37]	0.00340524	0.0207238	3.61594	1.13127
WT HFD vs WT NCD	K01200	E3.2.1.41; pullulanase [EC:3.2.1.41]	0.00340524	0.0207238	5.50739	1.43016
WT HFD vs WT NCD	K01201	GBA, srfJ; glucosylceramidase [EC:3.2.1.45]	0.00340524	0.0207238	-4.70838	2.30192
WT HFD vs WT NCD	K01207	nagZ; beta-N-acetylhexosaminidase [EC:3.2.1.52]	0.00340524	0.0207238	7.94379	3.36074
WT HFD vs WT NCD	K01215	dexB; glucan 1,6-alpha-glucosidase [EC:3.2.1.70]	0.00534099	0.0207238	6.55365	3.92526
WT HFD vs WT NCD	K01216	E3.2.1.73; licheninase [EC:3.2.1.73]	0.00422206	0.0207238	#VALUE!	NA
WT HFD vs WT NCD	K01220	E3.2.1.85, lacG; 6-phospho-beta-galactosidase [EC:3.2.1.85]	0.00534099	0.0207238	5.95776	4.00649
WT HFD vs WT NCD	K01223	E3.2.1.86B, bglA; 6-phospho-beta-glucosidase [EC:3.2.1.86]	0.00534099	0.0207238	5.98608	3.94828
WT HFD vs WT NCD	K01226	treC; trehalose-6-phosphate hydrolase [EC:3.2.1.93]	0.00534099	0.0207238	5.74615	3.79969
WT HFD vs WT NCD	K01232	E3.2.1.122, glvA; maltose-6'-phosphate glucosidase [EC:3.2.1.122]	0.00534099	0.0207238	5.93247	4.02371
WT HFD vs WT NCD	K01234	E3.2.1.135, nplT; neopullulanase [EC:3.2.1.135]	0.00534099	0.0207238	5.62854	3.65895
WT HFD vs WT NCD	K01239	iunH; purine nucleosidase [EC:3.2.2.1]	0.00534099	0.0207238	5.0492	3.30304
WT HFD vs WT NCD	K01243	mtnN, mtn, pfs; adenosylhomocysteine nucleosidase [EC:3.2.2.9]	0.00534099	0.0207238	4.62776	2.83106
WT HFD vs WT NCD	K01246	tag; DNA-3-methyladenine glycosylase I [EC:3.2.2.20]	0.00534099	0.0207238	4.45649	2.74779
WT HFD vs WT NCD	K01250	rihA; pyrimidine-specific ribonucleoside hydrolase [EC:3.2.-.-]	0.00336134	0.0207238	-5.91467	1.12167
WT HFD vs WT NCD	K01256	pepN; aminopeptidase N [EC:3.4.11.2]	0.00534099	0.0207238	4.55792	2.83278
WT HFD vs WT NCD	K01258	pepT; tripeptide aminopeptidase [EC:3.4.11.4]	0.00534099	0.0207238	4.87439	3.02689
WT HFD vs WT NCD	K01259	pip; proline iminopeptidase [EC:3.4.11.5]	0.00534099	0.0207238	5.76968	3.92035
WT HFD vs WT NCD	K01261	pepA; glutamyl aminopeptidase [EC:3.4.11.7]	0.00340524	0.0207238	7.51124	2.30881
WT HFD vs WT NCD	K01262	pepP; Xaa-Pro aminopeptidase [EC:3.4.11.9]	0.00534099	0.0207238	3.87566	2.33752
WT HFD vs WT NCD	K01263	E3.4.11.14; cytosol alanyl aminopeptidase [EC:3.4.11.14]	0.00534099	0.0207238	5.93303	4.02398
WT HFD vs WT NCD	K01265	map; methionyl aminopeptidase [EC:3.4.11.18]	0.00534099	0.0207238	4.06832	2.45271
WT HFD vs WT NCD	K01270	pepD; dipeptidase D [EC:3.4.13.-]	0.00534099	0.0207238	2.41706	1.27447
WT HFD vs WT NCD	K01271	pepQ; Xaa-Pro dipeptidase [EC:3.4.13.9]	0.00534099	0.0207238	5.10211	2.97767
WT HFD vs WT NCD	K01278	DPP4; dipeptidyl-peptidase 4 [EC:3.4.14.5]	0.00340524	0.0207238	-6.92829	1.90952
WT HFD vs WT NCD	K01281	E3.4.14.11, pepXP; X-Pro dipeptidyl-peptidase [EC:3.4.14.11]	0.00534099	0.0207238	5.82175	3.9075
WT HFD vs WT NCD	K01297	ldcA; muramoyltetrapeptide carboxypeptidase [EC:3.4.17.13]	0.00340524	0.0207238	-6.11424	1.27684
WT HFD vs WT NCD	K01299	E3.4.17.19; carboxypeptidase Taq [EC:3.4.17.19]	0.00534099	0.0207238	8.50942	4.23519
WT HFD vs WT NCD	K01304	E3.4.19.3, pcp; pyroglutamyl-peptidase [EC:3.4.19.3]	0.00534099	0.0207238	5.87172	3.84145
WT HFD vs WT NCD	K01338	lon; ATP-dependent Lon protease [EC:3.4.21.53]	0.00340524	0.0207238	-4.73348	2.10325
WT HFD vs WT NCD	K01356	lexA; repressor LexA [EC:3.4.21.88]	0.00534099	0.0207238	5.67589	3.75236
WT HFD vs WT NCD	K01358	clpP, CLPP; ATP-dependent Clp protease, protease subunit [EC:3.4.21.92]	0.00534099	0.0207238	4.55753	2.8125
WT HFD vs WT NCD	K01361	E3.4.21.96; lactocepin [EC:3.4.21.96]	0.00336134	0.0207238	Inf	NA
WT HFD vs WT NCD	K01372	E3.4.22.40, pepC; bleomycin hydrolase [EC:3.4.22.40]	0.00534099	0.0207238	4.88552	3.08117
WT HFD vs WT NCD	K01409	KAE1, tsaD, QRI7; N6-L-threonylcarbamoyladenine synthase [EC:2.3.1.234]	0.00534099	0.0207238	4.50021	2.74884
WT HFD vs WT NCD	K01419	hslV, clpQ; ATP-dependent HslUV protease, peptidase subunit HslV [EC:3.4.25.2]	0.00534099	0.0207238	5.77012	3.82686
WT HFD vs WT NCD	K01420	fnr; CRP/FNR family transcriptional regulator, anaerobic regulatory protein	0.00534099	0.0207238	5.78715	3.86538
WT HFD vs WT NCD	K01421	yhgE; putative membrane protein	0.00340524	0.0207238	5.86034	2.34566
WT HFD vs WT NCD	K01424	E3.5.1.1, ansA, ansB; L-asparaginase [EC:3.5.1.1]	0.00534099	0.0207238	3.95299	2.36547
WT HFD vs WT NCD	K01425	glsA, GLS; glutaminase [EC:3.5.1.2]	0.00534099	0.0207238	4.06235	2.53183
WT HFD vs WT NCD	K01426	E3.5.1.4, amiE; amidase [EC:3.5.1.4]	0.00340524	0.0207238	8.07426	1.45258
WT HFD vs WT NCD	K01442	E3.5.1.24; choloylglycine hydrolase [EC:3.5.1.24]	0.00534099	0.0207238	4.83266	3.00767
WT HFD vs WT NCD	K01443	nagA, AMDHD2; N-acetylglucosamine-6-phosphate deacetylase [EC:3.5.1.25]	0.00534099	0.0207238	4.24479	2.51166
WT HFD vs WT NCD	K01462	PDF, def; peptide deformylase [EC:3.5.1.88]	0.00534099	0.0207238	4.79217	2.98413
WT HFD vs WT NCD	K01465	URA4, pyrC; dihydroorotase [EC:3.5.2.3]	0.00534099	0.0207238	4.50214	2.74932
WT HFD vs WT NCD	K01467	ampC; beta-lactamase class C [EC:3.5.2.6]	0.00340524	0.0207238	9.49342	1.36222
WT HFD vs WT NCD	K01476	E3.5.3.1, rocF, arg; arginase [EC:3.5.3.1]	0.00336134	0.0207238	-4.75941	1.77
WT HFD vs WT NCD	K01478	arcA; arginine deiminase [EC:3.5.3.6]	0.00340524	0.0207238	5.64251	2.32723
WT HFD vs WT NCD	K01482	DDAH, ddaH; dimethylargininase [EC:3.5.3.18]	0.00323167	0.0207238	Inf	NA
WT HFD vs WT NCD	K01486	ade; adenine deaminase [EC:3.5.4.2]	0.00340524	0.0207238	6.67827	1.37064
WT HFD vs WT NCD	K01488	add, ADA; adenosine deaminase [EC:3.5.4.4]	0.00534099	0.0207238	5.38342	3.41944
WT HFD vs WT NCD	K01489	cdd, CDA; cytidine deaminase [EC:3.5.4.5]	0.00340524	0.0207238	3.4056	1.50487
WT HFD vs WT NCD	K01491	folD; methylenetetrahydrofolate dehydrogenase (NADP+) / methenyltetrahydrofolate cyclohydrolase [EC:1.5.1.5 3.5.4.9]	0.00534099	0.0207238	4.86358	3.03092
WT HFD vs WT NCD	K01493	comEB; dCMP deaminase [EC:3.5.4.12]	0.00534099	0.0207238	4.51413	2.73612
WT HFD vs WT NCD	K01512	acyP; acylphosphatase [EC:3.6.1.7]	0.00534099	0.0207238	5.73569	3.71437
WT HFD vs WT NCD	K01515	nudF; ADP-ribose pyrophosphatase [EC:3.6.1.13]	0.00534099	0.0207238	5.32912	3.35151
WT HFD vs WT NCD	K01520	dut, DUT; dUTP pyrophosphatase [EC:3.6.1.23]	0.00534099	0.0207238	4.80714	2.8342
WT HFD vs WT NCD	K01524	ppx-gppA; exopolyphosphatase / guanosine-5'-triphosphate,3'-diphosphate pyrophosphatase [EC:3.6.1.11 3.6.1.40]	0.00534099	0.0207238	1.88173	1.08958
WT HFD vs WT NCD	K01531	E3.6.3.2, mgtA, mgtB; Mg2+-importing ATPase [EC:3.6.3.2]	0.00534099	0.0207238	5.09316	3.16883
WT HFD vs WT NCD	K01533	copB; Cu2+-exporting ATPase [EC:3.6.3.4]	0.00534099	0.0207238	4.20659	2.5643
WT HFD vs WT NCD	K01534	zntA; Cd2+/Zn2+-exporting ATPase [EC:3.6.3.3 3.6.3.5]	0.00534099	0.0207238	4.55693	2.73709
WT HFD vs WT NCD	K01537	E3.6.3.8; Ca2+-transporting ATPase [EC:3.6.3.8]	0.00534099	0.0207238	5.10809	3.19813
WT HFD vs WT NCD	K01560	E3.8.1.2; 2-haloacid dehalogenase [EC:3.8.1.2]	0.00534099	0.0207238	5.9718	3.08855
WT HFD vs WT NCD	K01567	pdaA; peptidoglycan-N-acetylmuramic acid deacetylase [EC:3.5.1.-]	0.00323167	0.0207238	Inf	NA
WT HFD vs WT NCD	K01571	oadA; oxaloacetate decarboxylase, alpha subunit [EC:4.1.1.3]	0.00340524	0.0207238	6.91077	1.35854
WT HFD vs WT NCD	K01575	alsD, budA, aldC; acetolactate decarboxylase [EC:4.1.1.5]	0.00534099	0.0207238	5.74035	3.71393
WT HFD vs WT NCD	K01577	oxc; oxalyl-CoA decarboxylase [EC:4.1.1.8]	0.00534099	0.0207238	5.7059	3.90227
WT HFD vs WT NCD	K01581	E4.1.1.17, ODC1, speC, speF; ornithine decarboxylase [EC:4.1.1.17]	0.00534099	0.0207238	5.91786	4.00592
WT HFD vs WT NCD	K01586	lysA; diaminopimelate decarboxylase [EC:4.1.1.20]	0.00534099	0.0207238	3.97534	2.37778
WT HFD vs WT NCD	K01588	purE; 5-(carboxyamino)imidazole ribonucleotide mutase [EC:5.4.99.18]	0.00340524	0.0207238	2.88084	1.16224
WT HFD vs WT NCD	K01589	purK; 5-(carboxyamino)imidazole ribonucleotide synthase [EC:6.3.4.18]	0.00534099	0.0207238	3.08612	1.48852
WT HFD vs WT NCD	K01591	pyrF; orotidine-5'-phosphate decarboxylase [EC:4.1.1.23]	0.00534099	0.0207238	4.49115	2.76165
WT HFD vs WT NCD	K01595	ppc; phosphoenolpyruvate carboxylase [EC:4.1.1.31]	0.00534099	0.0207238	5.89492	4.00539
WT HFD vs WT NCD	K01597	MVD, mvaD; diphosphomevalonate decarboxylase [EC:4.1.1.33]	0.00534099	0.0207238	5.69224	3.74585
WT HFD vs WT NCD	K01598	PPCDC, coaC; phosphopantothenoylcysteine decarboxylase [EC:4.1.1.36]	0.00340524	0.0207238	9.12703	1.58528
WT HFD vs WT NCD	K01607	pcaC; 4-carboxymuconolactone decarboxylase [EC:4.1.1.44]	0.00534099	0.0207238	5.07334	3.15976
WT HFD vs WT NCD	K01609	trpC; indole-3-glycerol phosphate synthase [EC:4.1.1.48]	0.00340524	0.0207238	3.74491	1.73211
WT HFD vs WT NCD	K01610	E4.1.1.49, pckA; phosphoenolpyruvate carboxykinase (ATP) [EC:4.1.1.49]	0.00534099	0.0207238	4.50243	2.76742
WT HFD vs WT NCD	K01611	speD, AMD1; S-adenosylmethionine decarboxylase [EC:4.1.1.50]	0.00340524	0.0207238	-7.20442	1.54951
WT HFD vs WT NCD	K01613	psd, PISD; phosphatidylserine decarboxylase [EC:4.1.1.65]	0.00534099	0.0207238	4.81479	3.0333
WT HFD vs WT NCD	K01619	deoC, DERA; deoxyribose-phosphate aldolase [EC:4.1.2.4]	0.00534099	0.0207238	4.34961	2.67223
WT HFD vs WT NCD	K01621	xfp, xpk; xylulose-5-phosphate/fructose-6-phosphate phosphoketolase [EC:4.1.2.9 4.1.2.22]	0.00534099	0.0207238	5.44912	3.7324
WT HFD vs WT NCD	K01624	FBA, fbaA; fructose-bisphosphate aldolase, class II [EC:4.1.2.13]	0.00534099	0.0207238	4.48219	2.74098
WT HFD vs WT NCD	K01625	eda; 2-dehydro-3-deoxyphosphogluconate aldolase / (4S)-4-hydroxy-2-oxoglutarate aldolase [EC:4.1.2.14 4.1.3.42]	0.00340524	0.0207238	3.77588	1.76505
WT HFD vs WT NCD	K01626	E2.5.1.54, aroF, aroG, aroH; 3-deoxy-7-phosphoheptulonate synthase [EC:2.5.1.54]	0.00340524	0.0207238	7.33405	3.41456
WT HFD vs WT NCD	K01628	fucA; L-fuculose-phosphate aldolase [EC:4.1.2.17]	0.00534099	0.0207238	5.94087	3.89558
WT HFD vs WT NCD	K01629	rhaD; rhamnulose-1-phosphate aldolase [EC:4.1.2.19]	0.00340524	0.0207238	3.43981	1.58346
WT HFD vs WT NCD	K01635	lacD; tagatose 1,6-diphosphate aldolase [EC:4.1.2.40]	0.00534099	0.0207238	5.94608	3.99404
WT HFD vs WT NCD	K01639	E4.1.3.3, nanA, NPL; N-acetylneuraminate lyase [EC:4.1.3.3]	0.00340524	0.0207238	-5.81864	1.74538
WT HFD vs WT NCD	K01641	E2.3.3.10; hydroxymethylglutaryl-CoA synthase [EC:2.3.3.10]	0.00534099	0.0207238	5.69225	3.74585
WT HFD vs WT NCD	K01643	citF; citrate lyase subunit alpha / citrate CoA-transferase [EC:2.8.3.10]	0.00340524	0.0207238	9.2107	1.51178
WT HFD vs WT NCD	K01646	citD; citrate lyase subunit gamma (acyl carrier protein)	0.00340524	0.0207238	9.2107	1.51178
WT HFD vs WT NCD	K01647	CS, gltA; citrate synthase [EC:2.3.3.1]	0.00340524	0.0207238	3.83492	1.05856
WT HFD vs WT NCD	K01649	leuA; 2-isopropylmalate synthase [EC:2.3.3.13]	0.00340524	0.0207238	2.78484	1.19103
WT HFD vs WT NCD	K01652	E2.2.1.6L, ilvB, ilvG, ilvI; acetolactate synthase I/II/III large subunit [EC:2.2.1.6]	0.00534099	0.0207238	4.4424	2.60667
WT HFD vs WT NCD	K01653	E2.2.1.6S, ilvH, ilvN; acetolactate synthase I/III small subunit [EC:2.2.1.6]	0.00340524	0.0207238	3.5247	1.09389
WT HFD vs WT NCD	K01657	trpE; anthranilate synthase component I [EC:4.1.3.27]	0.00340524	0.0207238	3.13977	1.20164
WT HFD vs WT NCD	K01658	trpG; anthranilate synthase component II [EC:4.1.3.27]	0.00340524	0.0207238	3.74498	1.73226
WT HFD vs WT NCD	K01662	dxs; 1-deoxy-D-xylulose-5-phosphate synthase [EC:2.2.1.7]	0.00534099	0.0207238	3.49104	1.88187
WT HFD vs WT NCD	K01664	pabA; para-aminobenzoate synthetase component II [EC:2.6.1.85]	0.00534099	0.0207238	6.14611	3.29908
WT HFD vs WT NCD	K01677	E4.2.1.2AA, fumA; fumarate hydratase subunit alpha [EC:4.2.1.2]	0.00340524	0.0207238	Inf	NA
WT HFD vs WT NCD	K01678	E4.2.1.2AB, fumB; fumarate hydratase subunit beta [EC:4.2.1.2]	0.00336134	0.0207238	Inf	NA
WT HFD vs WT NCD	K01679	E4.2.1.2B, fumC; fumarate hydratase, class II [EC:4.2.1.2]	0.00534099	0.0207238	5.55277	3.67476
WT HFD vs WT NCD	K01681	ACO, acnA; aconitate hydratase [EC:4.2.1.3]	0.00340524	0.0207238	2.7616	1.16794
WT HFD vs WT NCD	K01687	ilvD; dihydroxy-acid dehydratase [EC:4.2.1.9]	0.00340524	0.0207238	3.47038	1.12492
WT HFD vs WT NCD	K01689	ENO, eno; enolase [EC:4.2.1.11]	0.00534099	0.0207238	4.93302	3.05467
WT HFD vs WT NCD	K01693	hisB; imidazoleglycerol-phosphate dehydratase [EC:4.2.1.19]	0.00340524	0.0207238	6.61724	2.90237
WT HFD vs WT NCD	K01695	trpA; tryptophan synthase alpha chain [EC:4.2.1.20]	0.00340524	0.0207238	3.1398	1.20165
WT HFD vs WT NCD	K01696	trpB; tryptophan synthase beta chain [EC:4.2.1.20]	0.00340524	0.0207238	3.13912	1.20181
WT HFD vs WT NCD	K01703	leuC; 3-isopropylmalate/(R)-2-methylmalate dehydratase large subunit [EC:4.2.1.33 4.2.1.35]	0.00340524	0.0207238	2.98249	1.17671
WT HFD vs WT NCD	K01704	leuD; 3-isopropylmalate/(R)-2-methylmalate dehydratase small subunit [EC:4.2.1.33 4.2.1.35]	0.00340524	0.0207238	2.57499	1.11556
WT HFD vs WT NCD	K01710	E4.2.1.46, rfbB, rffG; dTDP-glucose 4,6-dehydratase [EC:4.2.1.46]	0.00534099	0.0207238	3.49493	2.06099
WT HFD vs WT NCD	K01714	dapA; 4-hydroxy-tetrahydrodipicolinate synthase [EC:4.3.3.7]	0.00534099	0.0207238	3.99066	2.37475
WT HFD vs WT NCD	K01715	crt; enoyl-CoA hydratase [EC:4.2.1.17]	0.00534099	0.0207238	7.75567	3.87347
WT HFD vs WT NCD	K01733	thrC; threonine synthase [EC:4.2.3.1]	0.00534099	0.0207238	3.40984	1.75759
WT HFD vs WT NCD	K01735	aroB; 3-dehydroquinate synthase [EC:4.2.3.4]	0.00340524	0.0207238	3.43517	1.51905
WT HFD vs WT NCD	K01736	aroC; chorismate synthase [EC:4.2.3.5]	0.00340524	0.0207238	2.99065	1.18027
WT HFD vs WT NCD	K01738	cysK; cysteine synthase A [EC:2.5.1.47]	0.00340524	0.0207238	3.72372	1.72178
WT HFD vs WT NCD	K01739	metB; cystathionine gamma-synthase [EC:2.5.1.48]	0.00340524	0.0207238	6.43492	3.05048
WT HFD vs WT NCD	K01740	E2.5.1.49, metY; O-acetylhomoserine (thiol)-lyase [EC:2.5.1.49]	0.00534099	0.0207238	2.57362	1.16144
WT HFD vs WT NCD	K01744	aspA; aspartate ammonia-lyase [EC:4.3.1.1]	0.00340524	0.0207238	-5.67491	1.50835
WT HFD vs WT NCD	K01745	hutH, HAL; histidine ammonia-lyase [EC:4.3.1.3]	0.00340524	0.0207238	-5.83333	1.885
WT HFD vs WT NCD	K01751	E4.3.1.15; diaminopropionate ammonia-lyase [EC:4.3.1.15]	0.00534099	0.0207238	5.92632	4.02083
WT HFD vs WT NCD	K01752	E4.3.1.17, sdaA; L-serine dehydratase [EC:4.3.1.17]	0.00534099	0.0207238	4.85118	2.9706
WT HFD vs WT NCD	K01754	E4.3.1.19, ilvA, tdcB; threonine dehydratase [EC:4.3.1.19]	0.00340524	0.0207238	3.26802	1.10238
WT HFD vs WT NCD	K01755	argH, ASL; argininosuccinate lyase [EC:4.3.2.1]	0.00340524	0.0207238	2.87888	1.16241
WT HFD vs WT NCD	K01756	purB, ADSL; adenylosuccinate lyase [EC:4.3.2.2]	0.00534099	0.0207238	4.50141	2.74923
WT HFD vs WT NCD	K01760	metC; cystathionine beta-lyase [EC:4.4.1.8]	0.00534099	0.0207238	4.35393	2.13002
WT HFD vs WT NCD	K01771	E4.6.1.13, plc; 1-phosphatidylinositol phosphodiesterase [EC:4.6.1.13]	0.00331778	0.0207238	#VALUE!	NA
WT HFD vs WT NCD	K01772	hemH, FECH; ferrochelatase [EC:4.99.1.1]	0.00340524	0.0207238	5.40604	1.76037
WT HFD vs WT NCD	K01775	alr; alanine racemase [EC:5.1.1.1]	0.00534099	0.0207238	4.48229	2.73681
WT HFD vs WT NCD	K01776	murI; glutamate racemase [EC:5.1.1.3]	0.00534099	0.0207238	4.48292	2.80473
WT HFD vs WT NCD	K01778	dapF; diaminopimelate epimerase [EC:5.1.1.7]	0.00534099	0.0207238	4.41685	2.65884
WT HFD vs WT NCD	K01779	E5.1.1.13; aspartate racemase [EC:5.1.1.13]	0.00534099	0.0207238	5.82455	3.91315
WT HFD vs WT NCD	K01783	rpe, RPE; ribulose-phosphate 3-epimerase [EC:5.1.3.1]	0.00534099	0.0207238	4.52972	2.74847
WT HFD vs WT NCD	K01784	galE, GALE; UDP-glucose 4-epimerase [EC:5.1.3.2]	0.00534099	0.0207238	5.00692	3.09023
WT HFD vs WT NCD	K01785	galM, GALM; aldose 1-epimerase [EC:5.1.3.3]	0.00534099	0.0207238	3.63465	2.089
WT HFD vs WT NCD	K01788	nanE; N-acylglucosamine-6-phosphate 2-epimerase [EC:5.1.3.9]	0.00534099	0.0207238	5.83638	3.7533
WT HFD vs WT NCD	K01790	rfbC, rmlC; dTDP-4-dehydrorhamnose 3,5-epimerase [EC:5.1.3.13]	0.00534099	0.0207238	3.56926	2.08559
WT HFD vs WT NCD	K01791	wecB; UDP-N-acetylglucosamine 2-epimerase (non-hydrolysing) [EC:5.1.3.14]	0.00534099	0.0207238	3.57452	2.19243
WT HFD vs WT NCD	K01802	E5.2.1.8; peptidylprolyl isomerase [EC:5.2.1.8]	0.00340524	0.0207238	-5.10873	2.31691
WT HFD vs WT NCD	K01803	TPI, tpiA; triosephosphate isomerase (TIM) [EC:5.3.1.1]	0.00534099	0.0207238	4.42371	2.70532
WT HFD vs WT NCD	K01807	rpiA; ribose 5-phosphate isomerase A [EC:5.3.1.6]	0.00534099	0.0207238	5.08185	3.21187
WT HFD vs WT NCD	K01808	rpiB; ribose 5-phosphate isomerase B [EC:5.3.1.6]	0.00340524	0.0207238	2.99992	1.46789
WT HFD vs WT NCD	K01809	manA, MPI; mannose-6-phosphate isomerase [EC:5.3.1.8]	0.00534099	0.0207238	4.45277	2.76164
WT HFD vs WT NCD	K01810	GPI, pgi; glucose-6-phosphate isomerase [EC:5.3.1.9]	0.00534099	0.0207238	4.49998	2.74874
WT HFD vs WT NCD	K01811	yicI; alpha-D-xyloside xylohydrolase [EC:3.2.1.177]	0.00340524	0.0207238	3.47783	1.62537
WT HFD vs WT NCD	K01812	uxaC; glucuronate isomerase [EC:5.3.1.12]	0.00340524	0.0207238	3.7493	1.95464
WT HFD vs WT NCD	K01813	rhaA; L-rhamnose isomerase [EC:5.3.1.14]	0.00340524	0.0207238	4.19113	1.78775
WT HFD vs WT NCD	K01814	hisA; phosphoribosylformimino-5-aminoimidazole carboxamide ribotide isomerase [EC:5.3.1.16]	0.00340524	0.0207238	2.98772	1.17753
WT HFD vs WT NCD	K01819	E5.3.1.26, lacA, lacB; galactose-6-phosphate isomerase [EC:5.3.1.26]	0.00534099	0.0207238	6.115	3.90389
WT HFD vs WT NCD	K01821	praC, xylH; 4-oxalocrotonate tautomerase [EC:5.3.2.6]	0.00534099	0.0207238	4.5683	2.81719
WT HFD vs WT NCD	K01823	idi, IDI; isopentenyl-diphosphate delta-isomerase [EC:5.3.3.2]	0.00534099	0.0207238	5.68381	3.73679
WT HFD vs WT NCD	K01834	PGAM, gpmA; 2,3-bisphosphoglycerate-dependent phosphoglycerate mutase [EC:5.4.2.11]	0.00534099	0.0207238	4.91259	3.07295
WT HFD vs WT NCD	K01835	pgm; phosphoglucomutase [EC:5.4.2.2]	0.00534099	0.0207238	4.50675	2.74903
WT HFD vs WT NCD	K01838	pgmB; beta-phosphoglucomutase [EC:5.4.2.6]	0.00534099	0.0207238	5.59545	3.52689
WT HFD vs WT NCD	K01839	deoB; phosphopentomutase [EC:5.4.2.7]	0.00340524	0.0207238	6.12487	1.44721
WT HFD vs WT NCD	K01854	glf; UDP-galactopyranose mutase [EC:5.4.99.9]	0.00534099	0.0207238	4.37087	2.66847
WT HFD vs WT NCD	K01858	INO1, ISYNA1; myo-inositol-1-phosphate synthase [EC:5.5.1.4]	0.00340524	0.0207238	-6.16433	2.00899
WT HFD vs WT NCD	K01866	YARS, tyrS; tyrosyl-tRNA synthetase [EC:6.1.1.1]	0.00534099	0.0207238	4.50033	2.74886
WT HFD vs WT NCD	K01867	WARS, trpS; tryptophanyl-tRNA synthetase [EC:6.1.1.2]	0.00534099	0.0207238	4.50245	2.75065
WT HFD vs WT NCD	K01868	TARS, thrS; threonyl-tRNA synthetase [EC:6.1.1.3]	0.00534099	0.0207238	4.5002	2.74882
WT HFD vs WT NCD	K01869	LARS, leuS; leucyl-tRNA synthetase [EC:6.1.1.4]	0.00534099	0.0207238	4.50022	2.74885
WT HFD vs WT NCD	K01870	IARS, ileS; isoleucyl-tRNA synthetase [EC:6.1.1.5]	0.00534099	0.0207238	4.50022	2.74885
WT HFD vs WT NCD	K01872	AARS, alaS; alanyl-tRNA synthetase [EC:6.1.1.7]	0.00534099	0.0207238	4.42681	2.74795
WT HFD vs WT NCD	K01873	VARS, valS; valyl-tRNA synthetase [EC:6.1.1.9]	0.00534099	0.0207238	4.50022	2.74885
WT HFD vs WT NCD	K01874	MARS, metG; methionyl-tRNA synthetase [EC:6.1.1.10]	0.00534099	0.0207238	4.57198	2.7512
WT HFD vs WT NCD	K01875	SARS, serS; seryl-tRNA synthetase [EC:6.1.1.11]	0.00534099	0.0207238	4.5004	2.7489
WT HFD vs WT NCD	K01876	DARS, aspS; aspartyl-tRNA synthetase [EC:6.1.1.12]	0.00534099	0.0207238	4.49527	2.74564
WT HFD vs WT NCD	K01878	glyQ; glycyl-tRNA synthetase alpha chain [EC:6.1.1.14]	0.00534099	0.0207238	5.80803	3.89211
WT HFD vs WT NCD	K01879	glyS; glycyl-tRNA synthetase beta chain [EC:6.1.1.14]	0.00534099	0.0207238	5.80803	3.89211
WT HFD vs WT NCD	K01881	PARS, proS; prolyl-tRNA synthetase [EC:6.1.1.15]	0.00534099	0.0207238	4.5702	2.75036
WT HFD vs WT NCD	K01883	CARS, cysS; cysteinyl-tRNA synthetase [EC:6.1.1.16]	0.00534099	0.0207238	4.5003	2.74889
WT HFD vs WT NCD	K01887	RARS, argS; arginyl-tRNA synthetase [EC:6.1.1.19]	0.00534099	0.0207238	4.50022	2.74885
WT HFD vs WT NCD	K01889	FARSA, pheS; phenylalanyl-tRNA synthetase alpha chain [EC:6.1.1.20]	0.00534099	0.0207238	4.50022	2.74885
WT HFD vs WT NCD	K01890	FARSB, pheT; phenylalanyl-tRNA synthetase beta chain [EC:6.1.1.20]	0.00534099	0.0207238	4.50022	2.74885
WT HFD vs WT NCD	K01892	HARS, hisS; histidyl-tRNA synthetase [EC:6.1.1.21]	0.00534099	0.0207238	4.4483	2.71909
WT HFD vs WT NCD	K01893	NARS, asnS; asparaginyl-tRNA synthetase [EC:6.1.1.22]	0.00534099	0.0207238	4.51531	2.73848
WT HFD vs WT NCD	K01897	ACSL, fadD; long-chain acyl-CoA synthetase [EC:6.2.1.3]	0.00340524	0.0207238	-6.40731	1.85614
WT HFD vs WT NCD	K01902	sucD; succinyl-CoA synthetase alpha subunit [EC:6.2.1.5]	0.00340524	0.0207238	-4.71684	1.72924
WT HFD vs WT NCD	K01903	sucC; succinyl-CoA synthetase beta subunit [EC:6.2.1.5]	0.00340524	0.0207238	-4.71684	1.72924
WT HFD vs WT NCD	K01910	citC; [citrate (pro-3S)-lyase] ligase [EC:6.2.1.22]	0.00340524	0.0207238	9.2107	1.51178
WT HFD vs WT NCD	K01914	asnA; aspartate--ammonia ligase [EC:6.3.1.1]	0.00534099	0.0207238	4.58143	2.82236
WT HFD vs WT NCD	K01915	glnA, GLUL; glutamine synthetase [EC:6.3.1.2]	0.00534099	0.0207238	3.9276	2.3482
WT HFD vs WT NCD	K01916	nadE; NAD+ synthase [EC:6.3.1.5]	0.00534099	0.0207238	5.68193	3.73613
WT HFD vs WT NCD	K01921	ddl; D-alanine-D-alanine ligase [EC:6.3.2.4]	0.00534099	0.0207238	4.59051	2.80531
WT HFD vs WT NCD	K01922	PPCS, coaB; phosphopantothenate-cysteine ligase [EC:6.3.2.5]	0.00340524	0.0207238	9.80425	1.54296
WT HFD vs WT NCD	K01923	purC; phosphoribosylaminoimidazole-succinocarboxamide synthase [EC:6.3.2.6]	0.00340524	0.0207238	2.88228	1.16254
WT HFD vs WT NCD	K01924	murC; UDP-N-acetylmuramate--alanine ligase [EC:6.3.2.8]	0.00534099	0.0207238	4.49992	2.74869
WT HFD vs WT NCD	K01925	murD; UDP-N-acetylmuramoylalanine--D-glutamate ligase [EC:6.3.2.9]	0.00534099	0.0207238	4.57021	2.75036
WT HFD vs WT NCD	K01926	rex; redox-sensing transcriptional repressor	0.00534099	0.0207238	4.52858	2.7924
WT HFD vs WT NCD	K01928	murE; UDP-N-acetylmuramoyl-L-alanyl-D-glutamate--2,6-diaminopimelate ligase [EC:6.3.2.13]	0.00534099	0.0207238	4.90672	3.04835
WT HFD vs WT NCD	K01929	murF; UDP-N-acetylmuramoyl-tripeptide--D-alanyl-D-alanine ligase [EC:6.3.2.10]	0.00534099	0.0207238	4.39849	2.67993
WT HFD vs WT NCD	K01934	MTHFS; 5-formyltetrahydrofolate cyclo-ligase [EC:6.3.3.2]	0.00534099	0.0207238	4.46965	2.74816
WT HFD vs WT NCD	K01937	pyrG, CTPS; CTP synthase [EC:6.3.4.2]	0.00534099	0.0207238	4.50035	2.74893
WT HFD vs WT NCD	K01938	fhs; formate--tetrahydrofolate ligase [EC:6.3.4.3]	0.00534099	0.0207238	4.59688	2.8068
WT HFD vs WT NCD	K01939	purA, ADSS; adenylosuccinate synthase [EC:6.3.4.4]	0.00534099	0.0207238	4.57176	2.75096
WT HFD vs WT NCD	K01940	argG, ASS1; argininosuccinate synthase [EC:6.3.4.5]	0.00340524	0.0207238	2.87961	1.1626
WT HFD vs WT NCD	K01945	purD; phosphoribosylamine--glycine ligase [EC:6.3.4.13]	0.00340524	0.0207238	2.8796	1.16152
WT HFD vs WT NCD	K01951	guaA, GMPS; GMP synthase (glutamine-hydrolysing) [EC:6.3.5.2]	0.00534099	0.0207238	4.21328	2.55623
WT HFD vs WT NCD	K01952	purL, PFAS; phosphoribosylformylglycinamidine synthase [EC:6.3.5.3]	0.00340524	0.0207238	3.61098	1.25303
WT HFD vs WT NCD	K01953	asnB, ASNS; asparagine synthase (glutamine-hydrolysing) [EC:6.3.5.4]	0.00534099	0.0207238	4.74912	2.80785
WT HFD vs WT NCD	K01955	carB, CPA2; carbamoyl-phosphate synthase large subunit [EC:6.3.5.5]	0.00534099	0.0207238	4.33314	2.66856
WT HFD vs WT NCD	K01956	carA, CPA1; carbamoyl-phosphate synthase small subunit [EC:6.3.5.5]	0.00534099	0.0207238	4.85799	3.03472
WT HFD vs WT NCD	K01958	PC, pyc; pyruvate carboxylase [EC:6.4.1.1]	0.00340524	0.0207238	7.12975	2.06834
WT HFD vs WT NCD	K01962	accA; acetyl-CoA carboxylase carboxyl transferase subunit alpha [EC:6.4.1.2]	0.00340524	0.0207238	6.08019	1.4156
WT HFD vs WT NCD	K01963	accD; acetyl-CoA carboxylase carboxyl transferase subunit beta [EC:6.4.1.2]	0.00340524	0.0207238	6.08019	1.4156
WT HFD vs WT NCD	K01972	E6.5.1.2, ligA, ligB; DNA ligase (NAD+) [EC:6.5.1.2]	0.00534099	0.0207238	4.50148	2.74929
WT HFD vs WT NCD	K01975	ligT; 2'-5' RNA ligase [EC:6.5.1.-]	0.00340524	0.0207238	4.32303	2.21635
WT HFD vs WT NCD	K01977	16SrRNA, rrs; 16S ribosomal RNA	0.00534099	0.0207238	4.59859	2.8332
WT HFD vs WT NCD	K01978	rnpB; M1 RNA	0.00534099	0.0207238	5.20148	3.08183
WT HFD vs WT NCD	K01980	23SrRNA, rrl; 23S ribosomal RNA	0.00534099	0.0207238	4.23961	2.59019
WT HFD vs WT NCD	K01985	5SrRNA, rrf; 5S ribosomal RNA	0.00534099	0.0207238	4.26452	2.61265
WT HFD vs WT NCD	K01989	ABC.X4.S; putative ABC transport system substrate-binding protein	0.00534099	0.0207238	5.75306	3.82635
WT HFD vs WT NCD	K01990	ABC-2.A; ABC-2 type transport system ATP-binding protein	0.00534099	0.0207238	4.68774	2.84861
WT HFD vs WT NCD	K01992	ABC-2.P; ABC-2 type transport system permease protein	0.00534099	0.0207238	4.47031	2.68815
WT HFD vs WT NCD	K01995	livG; branched-chain amino acid transport system ATP-binding protein	0.00534099	0.0207238	5.50882	4.81513
WT HFD vs WT NCD	K01996	livF; branched-chain amino acid transport system ATP-binding protein	0.00534099	0.0207238	5.50874	4.81507
WT HFD vs WT NCD	K01997	livH; branched-chain amino acid transport system permease protein	0.00534099	0.0207238	5.50882	4.81513
WT HFD vs WT NCD	K01998	livM; branched-chain amino acid transport system permease protein	0.00534099	0.0207238	5.50882	4.81513
WT HFD vs WT NCD	K02003	ABC.CD.A; putative ABC transport system ATP-binding protein	0.00534099	0.0207238	4.21211	2.44998
WT HFD vs WT NCD	K02004	ABC.CD.P; putative ABC transport system permease protein	0.00534099	0.0207238	3.8305	2.15748
WT HFD vs WT NCD	K02010	afuC, fbpC; iron(III) transport system ATP-binding protein [EC:3.6.3.30]	0.00527816	0.0207238	Inf	NA
WT HFD vs WT NCD	K02011	afuB, fbpB; iron(III) transport system permease protein	0.00527816	0.0207238	Inf	NA
WT HFD vs WT NCD	K02012	afuA, fbpA; iron(III) transport system substrate-binding protein	0.00527816	0.0207238	8.7597	4.08319
WT HFD vs WT NCD	K02013	ABC.FEV.A; iron complex transport system ATP-binding protein [EC:3.6.3.34]	0.00340524	0.0207238	3.19896	1.1814
WT HFD vs WT NCD	K02015	ABC.FEV.P; iron complex transport system permease protein	0.00340524	0.0207238	3.56628	1.38079
WT HFD vs WT NCD	K02017	modC; molybdate transport system ATP-binding protein [EC:3.6.3.29]	0.00340524	0.0207238	6.84781	1.74379
WT HFD vs WT NCD	K02018	modB; molybdate transport system permease protein	0.00340524	0.0207238	6.75542	1.67954
WT HFD vs WT NCD	K02020	modA; molybdate transport system substrate-binding protein	0.00340524	0.0207238	6.7556	1.67963
WT HFD vs WT NCD	K02025	ABC.MS.P; multiple sugar transport system permease protein	0.00534099	0.0207238	6.07959	3.89551
WT HFD vs WT NCD	K02026	ABC.MS.P1; multiple sugar transport system permease protein	0.00534099	0.0207238	6.04721	3.93824
WT HFD vs WT NCD	K02027	ABC.MS.S; multiple sugar transport system substrate-binding protein	0.00534099	0.0207238	5.97108	3.94837
WT HFD vs WT NCD	K02028	ABC.PA.A; polar amino acid transport system ATP-binding protein [EC:3.6.3.21]	0.00534099	0.0207238	5.31155	3.36711
WT HFD vs WT NCD	K02029	ABC.PA.P; polar amino acid transport system permease protein	0.00534099	0.0207238	5.73906	3.79847
WT HFD vs WT NCD	K02030	ABC.PA.S; polar amino acid transport system substrate-binding protein	0.00534099	0.0207238	5.67173	3.68749
WT HFD vs WT NCD	K02031	ABC.PE.A; peptide/nickel transport system ATP-binding protein	0.00534099	0.0207238	5.63097	3.43319
WT HFD vs WT NCD	K02032	ABC.PE.A1; peptide/nickel transport system ATP-binding protein	0.00534099	0.0207238	5.7738	3.74967
WT HFD vs WT NCD	K02033	ABC.PE.P; peptide/nickel transport system permease protein	0.00534099	0.0207238	5.92625	3.77984
WT HFD vs WT NCD	K02034	ABC.PE.P1; peptide/nickel transport system permease protein	0.00534099	0.0207238	5.92882	3.7832
WT HFD vs WT NCD	K02035	ABC.PE.S; peptide/nickel transport system substrate-binding protein	0.00534099	0.0207238	5.91593	3.93306
WT HFD vs WT NCD	K02036	pstB; phosphate transport system ATP-binding protein [EC:3.6.3.27]	0.00534099	0.0207238	5.01224	3.11634
WT HFD vs WT NCD	K02037	pstC; phosphate transport system permease protein	0.00534099	0.0207238	4.60588	2.82498
WT HFD vs WT NCD	K02038	pstA; phosphate transport system permease protein	0.00534099	0.0207238	4.60588	2.82498
WT HFD vs WT NCD	K02039	phoU; phosphate transport system protein	0.00534099	0.0207238	4.60853	2.81792
WT HFD vs WT NCD	K02040	pstS; phosphate transport system substrate-binding protein	0.00534099	0.0207238	4.26751	2.5172
WT HFD vs WT NCD	K02041	phnC; phosphonate transport system ATP-binding protein [EC:3.6.3.28]	0.00534099	0.0207238	5.91876	3.83542
WT HFD vs WT NCD	K02042	phnE; phosphonate transport system permease protein	0.00534099	0.0207238	5.91959	3.83576
WT HFD vs WT NCD	K02044	phnD; phosphonate transport system substrate-binding protein	0.00534099	0.0207238	5.90289	3.91678
WT HFD vs WT NCD	K02045	cysA; sulfate transport system ATP-binding protein [EC:3.6.3.25]	0.00534099	0.0207238	7.76769	3.87601
WT HFD vs WT NCD	K02046	cysU; sulfate transport system permease protein	0.00534099	0.0207238	7.7676	3.87599
WT HFD vs WT NCD	K02047	cysW; sulfate transport system permease protein	0.00534099	0.0207238	7.7676	3.87599
WT HFD vs WT NCD	K02048	cysP, sbp; sulfate transport system substrate-binding protein	0.00534099	0.0207238	7.60445	3.64753
WT HFD vs WT NCD	K02056	ABC.SS.A; simple sugar transport system ATP-binding protein [EC:3.6.3.17]	0.00340524	0.0207238	7.03845	3.18032
WT HFD vs WT NCD	K02057	ABC.SS.P; simple sugar transport system permease protein	0.00340524	0.0207238	8.3474	2.11419
WT HFD vs WT NCD	K02068	ABC.X2.A; putative ABC transport system ATP-binding protein	0.00534099	0.0207238	5.05495	3.22139
WT HFD vs WT NCD	K02069	ABC.X2.P; putative ABC transport system permease protein	0.00534099	0.0207238	4.55347	2.8666
WT HFD vs WT NCD	K02071	metN; D-methionine transport system ATP-binding protein	0.00534099	0.0207238	5.69671	3.716
WT HFD vs WT NCD	K02072	metI; D-methionine transport system permease protein	0.00534099	0.0207238	5.71797	3.74461
WT HFD vs WT NCD	K02073	metQ; D-methionine transport system substrate-binding protein	0.00534099	0.0207238	5.56627	3.49705
WT HFD vs WT NCD	K02074	ABC.ZM.A; zinc/manganese transport system ATP-binding protein	0.00534099	0.0207238	5.74179	3.92266
WT HFD vs WT NCD	K02075	ABC.ZM.P; zinc/manganese transport system permease protein	0.00534099	0.0207238	5.74203	3.92277
WT HFD vs WT NCD	K02077	ABC.ZM.S; zinc/manganese transport system substrate-binding protein	0.00534099	0.0207238	5.81567	3.96616
WT HFD vs WT NCD	K02078	acpP; acyl carrier protein	0.00534099	0.0207238	3.54499	2.06788
WT HFD vs WT NCD	K02082	agaS; tagatose-6-phosphate ketose/aldose isomerase [EC:5.-.-.-]	0.00534099	0.0207238	5.93112	4.02326
WT HFD vs WT NCD	K02086	dnaD; DNA replication protein	0.00534099	0.0207238	5.69224	3.74585
WT HFD vs WT NCD	K02108	ATPF0A, atpB; F-type H+-transporting ATPase subunit a	0.00534099	0.0207238	4.60877	2.81691
WT HFD vs WT NCD	K02109	ATPF0B, atpF; F-type H+-transporting ATPase subunit b	0.00534099	0.0207238	4.67831	2.81818
WT HFD vs WT NCD	K02110	ATPF0C, atpE; F-type H+-transporting ATPase subunit c	0.00534099	0.0207238	4.67855	2.81861
WT HFD vs WT NCD	K02111	ATPF1A, atpA; F-type H+-transporting ATPase subunit alpha [EC:3.6.3.14]	0.00534099	0.0207238	4.61045	2.81764
WT HFD vs WT NCD	K02112	ATPF1B, atpD; F-type H+-transporting ATPase subunit beta [EC:3.6.3.14]	0.00534099	0.0207238	4.67861	2.81864
WT HFD vs WT NCD	K02113	ATPF1D, atpH; F-type H+-transporting ATPase subunit delta	0.00534099	0.0207238	4.67938	2.81916
WT HFD vs WT NCD	K02114	ATPF1E, atpC; F-type H+-transporting ATPase subunit epsilon	0.00534099	0.0207238	4.67856	2.81861
WT HFD vs WT NCD	K02115	ATPF1G, atpG; F-type H+-transporting ATPase subunit gamma	0.00534099	0.0207238	4.67855	2.81861
WT HFD vs WT NCD	K02117	ATPVA, ntpA, atpA; V/A-type H+-transporting ATPase subunit A [EC:3.6.3.14]	0.00534099	0.0207238	-5.54657	1.93007
WT HFD vs WT NCD	K02121	ATPVE, ntpE, atpE; V/A-type H+-transporting ATPase subunit E	0.00534099	0.0207238	-5.54657	1.93007
WT HFD vs WT NCD	K02122	ATPVF, ntpF, atpF; V/A-type H+-transporting ATPase subunit F	0.00534099	0.0207238	7.1378	4.29043
WT HFD vs WT NCD	K02160	accB, bccP; acetyl-CoA carboxylase biotin carboxyl carrier protein	0.00340524	0.0207238	4.73505	1.61906
WT HFD vs WT NCD	K02193	ccmA; heme exporter protein A [EC:3.6.3.41]	0.00340524	0.0207238	4.24077	2.15634
WT HFD vs WT NCD	K02194	ccmB; heme exporter protein B	0.00340524	0.0207238	4.24077	2.15634
WT HFD vs WT NCD	K02195	ccmC; heme exporter protein C	0.00340524	0.0207238	4.24077	2.15634
WT HFD vs WT NCD	K02197	ccmE; cytochrome c-type biogenesis protein CcmE	0.00340524	0.0207238	4.24077	2.15634
WT HFD vs WT NCD	K02198	ccmF; cytochrome c-type biogenesis protein CcmF	0.00340524	0.0207238	4.24077	2.15634
WT HFD vs WT NCD	K02203	thrH; phosphoserine / homoserine phosphotransferase [EC:3.1.3.3 2.7.1.39]	0.00336134	0.0207238	Inf	NA
WT HFD vs WT NCD	K02221	yggT; YggT family protein	0.00534099	0.0207238	5.73576	3.77987
WT HFD vs WT NCD	K02226	cobC2, cobC, phpB; alpha-ribazole phosphatase [EC:3.1.3.73]	0.00340524	0.0207238	3.37132	2.02864
WT HFD vs WT NCD	K02236	comC; leader peptidase (prepilin peptidase) / N-methyltransferase [EC:3.4.23.43 2.1.1.-]	0.00534099	0.0207238	5.69224	3.74585
WT HFD vs WT NCD	K02237	comEA; competence protein ComEA	0.00534099	0.0207238	5.71653	3.71885
WT HFD vs WT NCD	K02238	comEC; competence protein ComEC	0.00534099	0.0207238	4.47054	2.74988
WT HFD vs WT NCD	K02240	comFA; competence protein ComFA	0.00534099	0.0207238	5.65865	3.74768
WT HFD vs WT NCD	K02242	comFC; competence protein ComFC	0.00534099	0.0207238	5.68877	3.74541
WT HFD vs WT NCD	K02243	comGA; competence protein ComGA	0.00534099	0.0207238	5.65865	3.74768
WT HFD vs WT NCD	K02244	comGB; competence protein ComGB	0.00534099	0.0207238	5.65865	3.74768
WT HFD vs WT NCD	K02245	comGC; competence protein ComGC	0.00534099	0.0207238	5.69224	3.74585
WT HFD vs WT NCD	K02246	comGD; competence protein ComGD	0.00534099	0.0207238	5.4508	3.47494
WT HFD vs WT NCD	K02248	comGF; competence protein ComGF	0.00534099	0.0207238	5.90177	3.95405
WT HFD vs WT NCD	K02279	cpaB, rcpC; pilus assembly protein CpaB	0.00527816	0.0207238	Inf	NA
WT HFD vs WT NCD	K02282	cpaE, tadZ; pilus assembly protein CpaE	0.00340524	0.0207238	Inf	NA
WT HFD vs WT NCD	K02283	cpaF, tadA; pilus assembly protein CpaF	0.00340524	0.0207238	Inf	NA
WT HFD vs WT NCD	K02313	dnaA; chromosomal replication initiator protein	0.00534099	0.0207238	4.58907	2.80467
WT HFD vs WT NCD	K02314	dnaB; replicative DNA helicase [EC:3.6.4.12]	0.00534099	0.0207238	4.13165	2.50321
WT HFD vs WT NCD	K02315	dnaC; DNA replication protein DnaC	0.00340524	0.0207238	8.56597	2.24968
WT HFD vs WT NCD	K02316	dnaG; DNA primase [EC:2.7.7.-]	0.00534099	0.0207238	4.50178	2.74947
WT HFD vs WT NCD	K02334	dpo; DNA polymerase bacteriophage-type [EC:2.7.7.7]	0.00534099	0.0207238	5.72356	3.86095
WT HFD vs WT NCD	K02335	DPO1, polA; DNA polymerase I [EC:2.7.7.7]	0.00534099	0.0207238	4.50113	2.74915
WT HFD vs WT NCD	K02337	DPO3A1, dnaE; DNA polymerase III subunit alpha [EC:2.7.7.7]	0.00534099	0.0207238	4.50276	2.75084
WT HFD vs WT NCD	K02338	DPO3B, dnaN; DNA polymerase III subunit beta [EC:2.7.7.7]	0.00534099	0.0207238	4.50208	2.74977
WT HFD vs WT NCD	K02340	DPO3D1, holA; DNA polymerase III subunit delta [EC:2.7.7.7]	0.00534099	0.0207238	4.42679	2.74795
WT HFD vs WT NCD	K02341	DPO3D2, holB; DNA polymerase III subunit delta' [EC:2.7.7.7]	0.00534099	0.0207238	4.50071	2.74909
WT HFD vs WT NCD	K02342	DPO3E, dnaQ; DNA polymerase III subunit epsilon [EC:2.7.7.7]	0.00534099	0.0207238	4.47529	2.78773
WT HFD vs WT NCD	K02343	DPO3G, dnaX; DNA polymerase III subunit gamma/tau [EC:2.7.7.7]	0.00534099	0.0207238	4.58908	2.80468
WT HFD vs WT NCD	K02346	DPO4, dinB; DNA polymerase IV [EC:2.7.7.7]	0.00534099	0.0207238	4.55995	2.78263
WT HFD vs WT NCD	K02348	elaA; ElaA protein	0.00340524	0.0207238	4.45966	1.58996
WT HFD vs WT NCD	K02355	fusA, GFM, EFG; elongation factor G	0.00534099	0.0207238	3.96636	2.41789
WT HFD vs WT NCD	K02356	efp; elongation factor P	0.00534099	0.0207238	4.8953	3.05574
WT HFD vs WT NCD	K02357	tsf, TSFM; elongation factor Ts	0.00534099	0.0207238	4.5002	2.74884
WT HFD vs WT NCD	K02358	tuf, TUFM; elongation factor Tu	0.00534099	0.0207238	4.49526	2.74738
WT HFD vs WT NCD	K02363	entE, dhbE, vibE, mxcE; 2,3-dihydroxybenzoate-AMP ligase [EC:2.7.7.58]	0.00336134	0.0207238	Inf	NA
WT HFD vs WT NCD	K02371	fabK; enoyl-[acyl-carrier protein] reductase II [EC:1.3.1.9]	0.00340524	0.0207238	3.48747	1.9215
WT HFD vs WT NCD	K02372	fabZ; 3-hydroxyacyl-[acyl-carrier-protein] dehydratase [EC:4.2.1.59]	0.00340524	0.0207238	3.75291	1.52434
WT HFD vs WT NCD	K02417	fliNY, fliN; flagellar motor switch protein FliN/FliY	0.00534099	0.0207238	6.7166	3.93732
WT HFD vs WT NCD	K02428	rdgB; XTP/dITP diphosphohydrolase [EC:3.6.1.66]	0.00534099	0.0207238	4.01934	2.45216
WT HFD vs WT NCD	K02429	fucP; MFS transporter, FHS family, L-fucose permease	0.00340524	0.0207238	-6.18251	2.07614
WT HFD vs WT NCD	K02433	gatA, QRSL1; aspartyl-tRNA(Asn)/glutamyl-tRNA(Gln) amidotransferase subunit A [EC:6.3.5.6 6.3.5.7]	0.00534099	0.0207238	5.70579	3.704
WT HFD vs WT NCD	K02434	gatB, PET112; aspartyl-tRNA(Asn)/glutamyl-tRNA(Gln) amidotransferase subunit B [EC:6.3.5.6 6.3.5.7]	0.00534099	0.0207238	5.71182	3.71119
WT HFD vs WT NCD	K02435	gatC, GATC; aspartyl-tRNA(Asn)/glutamyl-tRNA(Gln) amidotransferase subunit C [EC:6.3.5.6 6.3.5.7]	0.00534099	0.0207238	5.63795	3.71037
WT HFD vs WT NCD	K02437	gcvH, GCSH; glycine cleavage system H protein	0.00340524	0.0207238	-5.17943	1.65463
WT HFD vs WT NCD	K02440	GLPF; glycerol uptake facilitator protein	0.00534099	0.0207238	5.85308	3.67063
WT HFD vs WT NCD	K02445	glpT; MFS transporter, OPA family, glycerol-3-phosphate transporter	0.00340524	0.0207238	4.53933	2.45405
WT HFD vs WT NCD	K02469	gyrA; DNA gyrase subunit A [EC:5.99.1.3]	0.00534099	0.0207238	4.647	2.8189
WT HFD vs WT NCD	K02470	gyrB; DNA gyrase subunit B [EC:5.99.1.3]	0.00534099	0.0207238	4.62161	2.76256
WT HFD vs WT NCD	K02473	E5.1.3.7, wbpP; UDP-N-acetylglucosamine 4-epimerase [EC:5.1.3.7]	0.00521573	0.0207238	#VALUE!	NA
WT HFD vs WT NCD	K02481	K02481; two-component system, NtrC family, response regulator	0.00497016	0.0207238	#VALUE!	NA
WT HFD vs WT NCD	K02484	K02484; two-component system, OmpR family, sensor kinase [EC:2.7.13.3]	0.00534099	0.0207238	3.01523	1.4732
WT HFD vs WT NCD	K02493	hemK, prmC, HEMK; release factor glutamine methyltransferase [EC:2.1.1.297]	0.00534099	0.0207238	4.50398	2.7504
WT HFD vs WT NCD	K02495	hemN, hemZ; oxygen-independent coproporphyrinogen III oxidase [EC:1.3.99.22]	0.00340524	0.0207238	2.90594	1.15742
WT HFD vs WT NCD	K02500	hisF; cyclase [EC:4.1.3.-]	0.00340524	0.0207238	2.98758	1.17746
WT HFD vs WT NCD	K02501	hisH; glutamine amidotransferase [EC:2.4.2.-]	0.00340524	0.0207238	2.9876	1.17746
WT HFD vs WT NCD	K02502	hisZ; ATP phosphoribosyltransferase regulatory subunit	0.00340524	0.0207238	8.99781	1.43306
WT HFD vs WT NCD	K02503	HINT1, hinT, hit; histidine triad (HIT) family protein	0.00534099	0.0207238	4.50155	2.74964
WT HFD vs WT NCD	K02517	lpxL, htrB; KDO2-lipid IV(A) lauroyltransferase [EC:2.3.1.241]	0.00340524	0.0207238	-5.99531	1.96628
WT HFD vs WT NCD	K02518	infA; translation initiation factor IF-1	0.00534099	0.0207238	4.50276	2.75084
WT HFD vs WT NCD	K02519	infB, MTIF2; translation initiation factor IF-2	0.00534099	0.0207238	4.59191	2.80691
WT HFD vs WT NCD	K02520	infC, MTIF3; translation initiation factor IF-3	0.00534099	0.0207238	4.59191	2.80691
WT HFD vs WT NCD	K02528	ksgA; 16S rRNA (adenine1518-N6/adenine1519-N6)-dimethyltransferase [EC:2.1.1.182]	0.00534099	0.0207238	4.59098	2.80552
WT HFD vs WT NCD	K02529	lacI, galR; LacI family transcriptional regulator	0.00534099	0.0207238	4.55213	2.61133
WT HFD vs WT NCD	K02530	lacR; DeoR family transcriptional regulator, lactose phosphotransferase system repressor	0.00534099	0.0207238	5.96147	4.00408
WT HFD vs WT NCD	K02531	lacT; transcriptional antiterminator	0.00534099	0.0207238	5.93024	4.02307
WT HFD vs WT NCD	K02548	menA; 1,4-dihydroxy-2-naphthoate octaprenyltransferase [EC:2.5.1.74 2.5.1.-]	0.00534099	0.0207238	4.45463	2.80681
WT HFD vs WT NCD	K02549	menC; O-succinylbenzoate synthase [EC:4.2.1.113]	0.00340524	0.0207238	7.39369	2.26266
WT HFD vs WT NCD	K02552	menF; menaquinone-specific isochorismate synthase [EC:5.4.4.2]	0.00340524	0.0207238	7.49516	2.31098
WT HFD vs WT NCD	K02556	motA; chemotaxis protein MotA	0.00534099	0.0207238	7.2496	4.26737
WT HFD vs WT NCD	K02563	murG; UDP-N-acetylglucosamine--N-acetylmuramyl-(pentapeptide) pyrophosphoryl-undecaprenol N-acetylglucosamine transferase [EC:2.4.1.227]	0.00534099	0.0207238	4.50022	2.74885
WT HFD vs WT NCD	K02564	nagB, GNPDA; glucosamine-6-phosphate deaminase [EC:3.5.99.6]	0.00534099	0.0207238	4.00016	2.40132
WT HFD vs WT NCD	K02567	napA; periplasmic nitrate reductase NapA [EC:1.7.99.4]	0.00336134	0.0207238	Inf	NA
WT HFD vs WT NCD	K02568	napB; cytochrome c-type protein NapB	0.00336134	0.0207238	Inf	NA
WT HFD vs WT NCD	K02570	napD; periplasmic nitrate reductase NapD	0.00336134	0.0207238	Inf	NA
WT HFD vs WT NCD	K02573	napG; ferredoxin-type protein NapG	0.00336134	0.0207238	Inf	NA
WT HFD vs WT NCD	K02574	napH; ferredoxin-type protein NapH	0.00336134	0.0207238	Inf	NA
WT HFD vs WT NCD	K02600	nusA; N utilization substance protein A	0.00534099	0.0207238	4.50022	2.74885
WT HFD vs WT NCD	K02601	nusG; transcriptional antiterminator NusG	0.00534099	0.0207238	4.49987	2.74862
WT HFD vs WT NCD	K02619	pabC; 4-amino-4-deoxychorismate lyase [EC:4.1.3.38]	0.00340524	0.0207238	-4.87737	1.88967
WT HFD vs WT NCD	K02621	parC; topoisomerase IV subunit A [EC:5.99.1.-]	0.00534099	0.0207238	4.44006	2.73546
WT HFD vs WT NCD	K02622	parE; topoisomerase IV subunit B [EC:5.99.1.-]	0.00534099	0.0207238	4.44006	2.73546
WT HFD vs WT NCD	K02654	pilD, pppA; leader peptidase (prepilin peptidase) / N-methyltransferase [EC:3.4.23.43 2.1.1.-]	0.00340524	0.0207238	7.62864	3.7762
WT HFD vs WT NCD	K02687	prmA; ribosomal protein L11 methyltransferase [EC:2.1.1.-]	0.00534099	0.0207238	4.59788	2.79036
WT HFD vs WT NCD	K02744	PTS-Aga-EIIA, agaF; PTS system, N-acetylgalactosamine-specific IIA component [EC:2.7.1.69]	0.00534099	0.0207238	5.91466	4.00572
WT HFD vs WT NCD	K02749	PTS-Arb-EIIB, glvB; PTS system, arbutin-like IIB component [EC:2.7.1.69]	0.00534099	0.0207238	5.72676	3.78119
WT HFD vs WT NCD	K02750	PTS-Arb-EIIC, glvC; PTS system, arbutin-like IIC component	0.00534099	0.0207238	5.72676	3.78119
WT HFD vs WT NCD	K02755	PTS-Bgl-EIIA, bglF; PTS system, beta-glucosides-specific IIA component [EC:2.7.1.69]	0.00534099	0.0207238	5.83521	3.82429
WT HFD vs WT NCD	K02756	PTS-Bgl-EIIB, bglF; PTS system, beta-glucosides-specific IIB component [EC:2.7.1.69]	0.00534099	0.0207238	5.88594	3.90446
WT HFD vs WT NCD	K02757	PTS-Bgl-EIIC, bglF; PTS system, beta-glucosides-specific IIC component	0.00534099	0.0207238	5.88585	3.90443
WT HFD vs WT NCD	K02759	PTS-Cel-EIIA, celC; PTS system, cellobiose-specific IIA component [EC:2.7.1.69]	0.00534099	0.0207238	5.83098	3.82281
WT HFD vs WT NCD	K02760	PTS-Cel-EIIB, celA; PTS system, cellobiose-specific IIB component [EC:2.7.1.69]	0.00534099	0.0207238	5.87	3.90215
WT HFD vs WT NCD	K02761	PTS-Cel-EIIC, celB; PTS system, cellobiose-specific IIC component	0.00534099	0.0207238	5.89146	3.95219
WT HFD vs WT NCD	K02768	PTS-Fru-EIIA, fruB; PTS system, fructose-specific IIA component [EC:2.7.1.69]	0.00534099	0.0207238	5.85829	3.77296
WT HFD vs WT NCD	K02769	PTS-Fru-EIIB, fruA; PTS system, fructose-specific IIB component [EC:2.7.1.69]	0.00534099	0.0207238	5.85279	3.77075
WT HFD vs WT NCD	K02770	PTS-Fru-EIIC, fruA; PTS system, fructose-specific IIC component	0.00534099	0.0207238	5.85268	3.77071
WT HFD vs WT NCD	K02773	PTS-Gat-EIIA, gatA; PTS system, galactitol-specific IIA component [EC:2.7.1.69]	0.00534099	0.0207238	5.92073	4.0167
WT HFD vs WT NCD	K02774	PTS-Gat-EIIB, gatB; PTS system, galactitol-specific IIB component [EC:2.7.1.69]	0.00534099	0.0207238	5.9003	4.00602
WT HFD vs WT NCD	K02775	PTS-Gat-EIIC, gatC; PTS system, galactitol-specific IIC component	0.00534099	0.0207238	5.12803	3.27354
WT HFD vs WT NCD	K02777	PTS-Glc-EIIA, crr; PTS system, glucose-specific IIA component [EC:2.7.1.69]	0.00534099	0.0207238	5.8278	3.89485
WT HFD vs WT NCD	K02778	PTS-Glc-EIIB, ptsG; PTS system, glucose-specific IIB component [EC:2.7.1.69]	0.00534099	0.0207238	5.92083	4.00935
WT HFD vs WT NCD	K02779	PTS-Glc-EIIC, ptsG; PTS system, glucose-specific IIC component	0.00534099	0.0207238	5.92083	4.00935
WT HFD vs WT NCD	K02781	PTS-Gut-EIIA, srlB; PTS system, glucitol/sorbitol-specific IIA component [EC:2.7.1.69]	0.00534099	0.0207238	5.90727	4.00446
WT HFD vs WT NCD	K02786	PTS-Lac-EIIA, lacF; PTS system, lactose-specific IIA component [EC:2.7.1.69]	0.00534099	0.0207238	6.11368	3.90364
WT HFD vs WT NCD	K02787	PTS-Lac-EIIB, lacE; PTS system, lactose-specific IIB component [EC:2.7.1.69]	0.00534099	0.0207238	6.02803	3.95867
WT HFD vs WT NCD	K02788	PTS-Lac-EIIC, lacE; PTS system, lactose-specific IIC component	0.00534099	0.0207238	6.02803	3.95867
WT HFD vs WT NCD	K02793	PTS-Man-EIIA, manX; PTS system, mannose-specific IIA component [EC:2.7.1.69]	0.00534099	0.0207238	5.93858	4.00401
WT HFD vs WT NCD	K02794	PTS-Man-EIIB, manX; PTS system, mannose-specific IIB component [EC:2.7.1.69]	0.00534099	0.0207238	5.93658	4.00981
WT HFD vs WT NCD	K02795	PTS-Man-EIIC, manY; PTS system, mannose-specific IIC component	0.00534099	0.0207238	5.9379	4.01027
WT HFD vs WT NCD	K02796	PTS-Man-EIID, manZ; PTS system, mannose-specific IID component	0.00534099	0.0207238	5.94432	4.01146
WT HFD vs WT NCD	K02798	PTS-Mtl-EIIA, mtlA; PTS system, mannitol-specific IIA component [EC:2.7.1.69]	0.00340524	0.0207238	5.70789	1.50811
WT HFD vs WT NCD	K02799	PTS-Mtl-EIIB, mtlA; PTS system, mannitol-specific IIB component [EC:2.7.1.69]	0.00340524	0.0207238	4.82406	1.52099
WT HFD vs WT NCD	K02800	PTS-Mtl-EIIC, mtlA; PTS system, mannitol-specific IIC component	0.00340524	0.0207238	4.82406	1.52099
WT HFD vs WT NCD	K02808	PTS-Scr-EIIA, scrA; PTS system, sucrose-specific IIA component [EC:2.7.1.69]	0.00534099	0.0207238	5.93997	4.01387
WT HFD vs WT NCD	K02809	PTS-Scr-EIIB, scrA; PTS system, sucrose-specific IIB component [EC:2.7.1.69]	0.00534099	0.0207238	5.80742	3.83007
WT HFD vs WT NCD	K02810	PTS-Scr-EIIC, scrA; PTS system, sucrose-specific IIC component	0.00534099	0.0207238	5.80742	3.83007
WT HFD vs WT NCD	K02822	PTS-Ula-EIIB, ulaB, sgaB; PTS system, ascorbate-specific IIB component [EC:2.7.1.69]	0.00340524	0.0207238	6.34053	2.46667
WT HFD vs WT NCD	K02823	pyrDII; dihydroorotate dehydrogenase electron transfer subunit	0.00340524	0.0207238	3.0307	1.14948
WT HFD vs WT NCD	K02824	pyrP, uraA; uracil permease	0.00534099	0.0207238	5.11584	3.15906
WT HFD vs WT NCD	K02825	pyrR; pyrimidine operon attenuation protein / uracil phosphoribosyltransferase [EC:2.4.2.9]	0.00534099	0.0207238	5.79448	3.86487
WT HFD vs WT NCD	K02834	rbfA; ribosome-binding factor A	0.00534099	0.0207238	4.5002	2.74884
WT HFD vs WT NCD	K02835	prfA, MTRF1, MRF1; peptide chain release factor 1	0.00534099	0.0207238	4.5002	2.74884
WT HFD vs WT NCD	K02836	prfB; peptide chain release factor 2	0.00534099	0.0207238	4.50003	2.74879
WT HFD vs WT NCD	K02837	prfC; peptide chain release factor 3	0.00534099	0.0207238	4.43677	2.73503
WT HFD vs WT NCD	K02838	frr, MRRF, RRF; ribosome recycling factor	0.00534099	0.0207238	4.5002	2.74884
WT HFD vs WT NCD	K02851	wecA, tagO, rfe; UDP-GlcNAc:undecaprenyl-phosphate GlcNAc-1-phosphate transferase [EC:2.7.8.33]	0.00534099	0.0207238	5.75646	3.83777
WT HFD vs WT NCD	K02859	ribT; riboflavin biosynthesis RibT protein	0.00534099	0.0207238	5.76316	3.9242
WT HFD vs WT NCD	K02860	rimM; 16S rRNA processing protein RimM	0.00534099	0.0207238	4.51881	2.76113
WT HFD vs WT NCD	K02863	RP-L1, MRPL1, rplA; large subunit ribosomal protein L1	0.00534099	0.0207238	4.58879	2.80447
WT HFD vs WT NCD	K02864	RP-L10, MRPL10, rplJ; large subunit ribosomal protein L10	0.00534099	0.0207238	4.42488	2.74708
WT HFD vs WT NCD	K02867	RP-L11, MRPL11, rplK; large subunit ribosomal protein L11	0.00534099	0.0207238	4.49987	2.74862
WT HFD vs WT NCD	K02871	RP-L13, MRPL13, rplM; large subunit ribosomal protein L13	0.00534099	0.0207238	4.58891	2.80463
WT HFD vs WT NCD	K02874	RP-L14, MRPL14, rplN; large subunit ribosomal protein L14	0.00534099	0.0207238	4.50022	2.74885
WT HFD vs WT NCD	K02876	RP-L15, MRPL15, rplO; large subunit ribosomal protein L15	0.00534099	0.0207238	4.50278	2.75084
WT HFD vs WT NCD	K02878	RP-L16, MRPL16, rplP; large subunit ribosomal protein L16	0.00534099	0.0207238	4.5002	2.74884
WT HFD vs WT NCD	K02879	RP-L17, MRPL17, rplQ; large subunit ribosomal protein L17	0.00534099	0.0207238	4.5002	2.74884
WT HFD vs WT NCD	K02881	RP-L18, MRPL18, rplR; large subunit ribosomal protein L18	0.00534099	0.0207238	4.50022	2.74885
WT HFD vs WT NCD	K02884	RP-L19, MRPL19, rplS; large subunit ribosomal protein L19	0.00534099	0.0207238	4.5002	2.74884
WT HFD vs WT NCD	K02886	RP-L2, MRPL2, rplB; large subunit ribosomal protein L2	0.00534099	0.0207238	4.50022	2.74885
WT HFD vs WT NCD	K02887	RP-L20, MRPL20, rplT; large subunit ribosomal protein L20	0.00534099	0.0207238	4.58908	2.80468
WT HFD vs WT NCD	K02888	RP-L21, MRPL21, rplU; large subunit ribosomal protein L21	0.00534099	0.0207238	4.5002	2.74884
WT HFD vs WT NCD	K02890	RP-L22, MRPL22, rplV; large subunit ribosomal protein L22	0.00534099	0.0207238	4.50022	2.74885
WT HFD vs WT NCD	K02892	RP-L23, MRPL23, rplW; large subunit ribosomal protein L23	0.00534099	0.0207238	4.50022	2.74885
WT HFD vs WT NCD	K02895	RP-L24, MRPL24, rplX; large subunit ribosomal protein L24	0.00534099	0.0207238	4.5018	2.74948
WT HFD vs WT NCD	K02897	RP-L25, rplY; large subunit ribosomal protein L25	0.00340524	0.0207238	-4.73869	1.65588
WT HFD vs WT NCD	K02899	RP-L27, MRPL27, rpmA; large subunit ribosomal protein L27	0.00534099	0.0207238	4.50306	2.75103
WT HFD vs WT NCD	K02902	RP-L28, MRPL28, rpmB; large subunit ribosomal protein L28	0.00534099	0.0207238	4.50282	2.75087
WT HFD vs WT NCD	K02904	RP-L29, rpmC; large subunit ribosomal protein L29	0.00534099	0.0207238	4.5018	2.74948
WT HFD vs WT NCD	K02906	RP-L3, MRPL3, rplC; large subunit ribosomal protein L3	0.00534099	0.0207238	4.55675	2.8043
WT HFD vs WT NCD	K02907	RP-L30, MRPL30, rpmD; large subunit ribosomal protein L30	0.00534099	0.0207238	4.58981	2.80504
WT HFD vs WT NCD	K02909	RP-L31, rpmE; large subunit ribosomal protein L31	0.00534099	0.0207238	4.49031	2.76068
WT HFD vs WT NCD	K02911	RP-L32, MRPL32, rpmF; large subunit ribosomal protein L32	0.00534099	0.0207238	4.55993	2.83989
WT HFD vs WT NCD	K02913	RP-L33, MRPL33, rpmG; large subunit ribosomal protein L33	0.00534099	0.0207238	4.91747	3.02564
WT HFD vs WT NCD	K02914	RP-L34, MRPL34, rpmH; large subunit ribosomal protein L34	0.00534099	0.0207238	4.51336	2.75763
WT HFD vs WT NCD	K02916	RP-L35, MRPL35, rpmI; large subunit ribosomal protein L35	0.00534099	0.0207238	4.50229	2.7499
WT HFD vs WT NCD	K02919	RP-L36, MRPL36, rpmJ; large subunit ribosomal protein L36	0.00534099	0.0207238	4.84771	3.04337
WT HFD vs WT NCD	K02926	RP-L4, MRPL4, rplD; large subunit ribosomal protein L4	0.00534099	0.0207238	4.58908	2.80468
WT HFD vs WT NCD	K02931	RP-L5, MRPL5, rplE; large subunit ribosomal protein L5	0.00534099	0.0207238	4.42681	2.74795
WT HFD vs WT NCD	K02933	RP-L6, MRPL6, rplF; large subunit ribosomal protein L6	0.00534099	0.0207238	4.58909	2.80468
WT HFD vs WT NCD	K02935	RP-L7, MRPL12, rplL; large subunit ribosomal protein L7/L12	0.00534099	0.0207238	4.50016	2.7488
WT HFD vs WT NCD	K02939	RP-L9, MRPL9, rplI; large subunit ribosomal protein L9	0.00534099	0.0207238	4.5002	2.74884
WT HFD vs WT NCD	K02945	RP-S1, rpsA; small subunit ribosomal protein S1	0.00534099	0.0207238	4.48806	2.69964
WT HFD vs WT NCD	K02946	RP-S10, MRPS10, rpsJ; small subunit ribosomal protein S10	0.00534099	0.0207238	4.42523	2.74731
WT HFD vs WT NCD	K02948	RP-S11, MRPS11, rpsK; small subunit ribosomal protein S11	0.00534099	0.0207238	4.50022	2.74885
WT HFD vs WT NCD	K02950	RP-S12, MRPS12, rpsL; small subunit ribosomal protein S12	0.00534099	0.0207238	4.59192	2.80691
WT HFD vs WT NCD	K02952	RP-S13, rpsM; small subunit ribosomal protein S13	0.00534099	0.0207238	4.50022	2.74885
WT HFD vs WT NCD	K02954	RP-S14, MRPS14, rpsN; small subunit ribosomal protein S14	0.00534099	0.0207238	4.78663	2.99699
WT HFD vs WT NCD	K02956	RP-S15, MRPS15, rpsO; small subunit ribosomal protein S15	0.00534099	0.0207238	4.50022	2.74885
WT HFD vs WT NCD	K02959	RP-S16, MRPS16, rpsP; small subunit ribosomal protein S16	0.00534099	0.0207238	4.5002	2.74884
WT HFD vs WT NCD	K02961	RP-S17, MRPS17, rpsQ; small subunit ribosomal protein S17	0.00534099	0.0207238	4.42936	2.74994
WT HFD vs WT NCD	K02963	RP-S18, MRPS18, rpsR; small subunit ribosomal protein S18	0.00534099	0.0207238	4.50021	2.74885
WT HFD vs WT NCD	K02965	RP-S19, rpsS; small subunit ribosomal protein S19	0.00534099	0.0207238	4.50052	2.74903
WT HFD vs WT NCD	K02967	RP-S2, MRPS2, rpsB; small subunit ribosomal protein S2	0.00534099	0.0207238	4.58909	2.80468
WT HFD vs WT NCD	K02968	RP-S20, rpsT; small subunit ribosomal protein S20	0.00534099	0.0207238	4.50434	2.75147
WT HFD vs WT NCD	K02970	RP-S21, MRPS21, rpsU; small subunit ribosomal protein S21	0.00534099	0.0207238	4.50896	2.73447
WT HFD vs WT NCD	K02982	RP-S3, rpsC; small subunit ribosomal protein S3	0.00534099	0.0207238	4.50022	2.74885
WT HFD vs WT NCD	K02986	RP-S4, rpsD; small subunit ribosomal protein S4	0.00534099	0.0207238	4.50022	2.74885
WT HFD vs WT NCD	K02988	RP-S5, MRPS5, rpsE; small subunit ribosomal protein S5	0.00534099	0.0207238	4.42779	2.7493
WT HFD vs WT NCD	K02990	RP-S6, MRPS6, rpsF; small subunit ribosomal protein S6	0.00534099	0.0207238	4.5002	2.74884
WT HFD vs WT NCD	K02992	RP-S7, MRPS7, rpsG; small subunit ribosomal protein S7	0.00534099	0.0207238	4.50145	2.74925
WT HFD vs WT NCD	K02994	RP-S8, rpsH; small subunit ribosomal protein S8	0.00534099	0.0207238	4.50022	2.74885
WT HFD vs WT NCD	K02996	RP-S9, MRPS9, rpsI; small subunit ribosomal protein S9	0.00534099	0.0207238	4.51592	2.80372
WT HFD vs WT NCD	K03040	rpoA; DNA-directed RNA polymerase subunit alpha [EC:2.7.7.6]	0.00534099	0.0207238	4.42521	2.74731
WT HFD vs WT NCD	K03043	rpoB; DNA-directed RNA polymerase subunit beta [EC:2.7.7.6]	0.00534099	0.0207238	4.49798	2.74696
WT HFD vs WT NCD	K03046	rpoC; DNA-directed RNA polymerase subunit beta' [EC:2.7.7.6]	0.00534099	0.0207238	4.50307	2.75093
WT HFD vs WT NCD	K03048	rpoE; DNA-directed RNA polymerase subunit delta	0.00534099	0.0207238	5.69224	3.74585
WT HFD vs WT NCD	K03060	rpoZ; DNA-directed RNA polymerase subunit omega [EC:2.7.7.6]	0.00534099	0.0207238	5.73172	3.74076
WT HFD vs WT NCD	K03070	secA; preprotein translocase subunit SecA	0.00534099	0.0207238	4.86451	3.03147
WT HFD vs WT NCD	K03073	secE; preprotein translocase subunit SecE	0.00534099	0.0207238	4.50189	2.74965
WT HFD vs WT NCD	K03075	secG; preprotein translocase subunit SecG	0.00534099	0.0207238	4.45695	2.76577
WT HFD vs WT NCD	K03076	secY; preprotein translocase subunit SecY	0.00534099	0.0207238	4.59186	2.80689
WT HFD vs WT NCD	K03086	SIG1, rpoD; RNA polymerase primary sigma factor	0.00534099	0.0207238	4.49863	2.74822
WT HFD vs WT NCD	K03091	SIG3.4; RNA polymerase sporulation-specific sigma factor	0.00534099	0.0207238	5.78267	3.6219
WT HFD vs WT NCD	K03095	sprL; SprT-like protein	0.00534099	0.0207238	5.69224	3.74585
WT HFD vs WT NCD	K03100	lepB; signal peptidase I [EC:3.4.21.89]	0.00534099	0.0207238	4.33083	2.62008
WT HFD vs WT NCD	K03101	lspA; signal peptidase II [EC:3.4.23.36]	0.00534099	0.0207238	4.57032	2.75044
WT HFD vs WT NCD	K03106	SRP54, ffh; signal recognition particle subunit SRP54	0.00534099	0.0207238	4.57019	2.75036
WT HFD vs WT NCD	K03110	ftsY; fused signal recognition particle receptor	0.00534099	0.0207238	4.46784	2.74832
WT HFD vs WT NCD	K03111	ssb; single-strand DNA-binding protein	0.00534099	0.0207238	4.48637	2.62399
WT HFD vs WT NCD	K03146	THI4, THI1; thiamine thiazole synthase	0.00145409	0.0207238	#VALUE!	NA
WT HFD vs WT NCD	K03149	thiG; thiazole synthase [EC:2.8.1.10]	0.00340524	0.0207238	-4.80991	1.93829
WT HFD vs WT NCD	K03151	thiI; thiamine biosynthesis protein ThiI	0.00534099	0.0207238	5.70602	3.71545
WT HFD vs WT NCD	K03152	thiJ; 4-methyl-5(b-hydroxyethyl)-thiazole monophosphate biosynthesis	0.00534099	0.0207238	4.56274	2.81068
WT HFD vs WT NCD	K03168	topA; DNA topoisomerase I [EC:5.99.1.2]	0.00534099	0.0207238	4.4259	2.74824
WT HFD vs WT NCD	K03177	truB, PUS4, TRUB1; tRNA pseudouridine55 synthase [EC:5.4.99.25]	0.00534099	0.0207238	4.50068	2.74911
WT HFD vs WT NCD	K03183	ubiE; demethylmenaquinone methyltransferase / 2-methoxy-6-polyprenyl-1,4-benzoquinol methylase [EC:2.1.1.163 2.1.1.201]	0.00534099	0.0207238	4.40744	2.73587
WT HFD vs WT NCD	K03205	virD4, lvhD4; type IV secretion system protein VirD4	0.00340524	0.0207238	9.0151	1.96012
WT HFD vs WT NCD	K03210	yajC; preprotein translocase subunit YajC	0.00534099	0.0207238	4.49881	2.74816
WT HFD vs WT NCD	K03215	rumA; 23S rRNA (uracil1939-C5)-methyltransferase [EC:2.1.1.190]	0.00534099	0.0207238	4.57946	2.7355
WT HFD vs WT NCD	K03216	trmL, cspR; tRNA (cytidine/uridine-2'-O-)-methyltransferase [EC:2.1.1.207]	0.00534099	0.0207238	5.71624	3.71874
WT HFD vs WT NCD	K03217	yidC, spoIIIJ, OXA1; YidC/Oxa1 family membrane protein insertase	0.00534099	0.0207238	4.8634	3.01293
WT HFD vs WT NCD	K03218	rlmB; 23S rRNA (guanosine2251-2'-O)-methyltransferase [EC:2.1.1.185]	0.00534099	0.0207238	4.42521	2.74731
WT HFD vs WT NCD	K03271	gmhA, lpcA; D-sedoheptulose 7-phosphate isomerase [EC:5.3.1.28]	0.00340524	0.0207238	4.18044	1.87022
WT HFD vs WT NCD	K03273	gmhB; D-glycero-D-manno-heptose 1,7-bisphosphate phosphatase [EC:3.1.3.82 3.1.3.83]	0.00340524	0.0207238	4.17801	1.87074
WT HFD vs WT NCD	K03282	mscL; large conductance mechanosensitive channel	0.00534099	0.0207238	4.40036	2.67978
WT HFD vs WT NCD	K03284	corA; magnesium transporter	0.00340524	0.0207238	2.71059	1.16085
WT HFD vs WT NCD	K03292	TC.GPH; glycoside/pentoside/hexuronide:cation symporter, GPH family	0.00340524	0.0207238	6.22056	1.44514
WT HFD vs WT NCD	K03293	TC.AAT; amino acid transporter, AAT family	0.00534099	0.0207238	4.771	2.87075
WT HFD vs WT NCD	K03294	TC.APA; basic amino acid/polyamine antiporter, APA family	0.00534099	0.0207238	5.16483	3.30315
WT HFD vs WT NCD	K03303	lctP; lactate permease	0.00534099	0.0207238	4.52027	2.82273
WT HFD vs WT NCD	K03305	TC.POT; proton-dependent oligopeptide transporter, POT family	0.00534099	0.0207238	4.51301	2.77905
WT HFD vs WT NCD	K03308	TC.NSS; neurotransmitter:Na+ symporter, NSS family	0.00340524	0.0207238	3.50401	1.54139
WT HFD vs WT NCD	K03310	TC.AGCS; alanine or glycine:cation symporter, AGCS family	0.00340524	0.0207238	3.83246	1.28298
WT HFD vs WT NCD	K03311	TC.LIVCS; branched-chain amino acid:cation transporter, LIVCS family	0.00534099	0.0207238	5.67413	3.77744
WT HFD vs WT NCD	K03315	nhaC; Na+:H+ antiporter, NhaC family	0.00534099	0.0207238	4.36869	2.68779
WT HFD vs WT NCD	K03316	TC.CPA1; monovalent cation:H+ antiporter, CPA1 family	0.00534099	0.0207238	5.60439	3.71291
WT HFD vs WT NCD	K03319	TC.DASS; divalent anion:Na+ symporter, DASS family	0.00534099	0.0207238	4.62771	3.01069
WT HFD vs WT NCD	K03320	amt, AMT, MEP; ammonium transporter, Amt family	0.00340524	0.0207238	3.59593	1.15874
WT HFD vs WT NCD	K03321	TC.SULP; sulfate permease, SulP family	0.00340524	0.0207238	3.77811	1.78518
WT HFD vs WT NCD	K03322	mntH; manganese transport protein	0.00534099	0.0207238	4.49503	2.76126
WT HFD vs WT NCD	K03328	TC.PST; polysaccharide transporter, PST family	0.00534099	0.0207238	3.29887	1.69811
WT HFD vs WT NCD	K03342	pabBC; para-aminobenzoate synthetase / 4-amino-4-deoxychorismate lyase [EC:2.6.1.85 4.1.3.38]	0.00340524	0.0207238	Inf	NA
WT HFD vs WT NCD	K03346	dnaB2, dnaB; replication initiation and membrane attachment protein	0.00534099	0.0207238	5.69224	3.74585
WT HFD vs WT NCD	K03366	butA, budC; meso-butanediol dehydrogenase / (S,S)-butanediol dehydrogenase / diacetyl reductase [EC:1.1.1.- 1.1.1.76 1.1.1.304]	0.00340524	0.0207238	5.42605	2.46634
WT HFD vs WT NCD	K03367	dltA; D-alanine--poly(phosphoribitol) ligase subunit 1 [EC:6.1.1.13]	0.00534099	0.0207238	5.6923	3.74598
WT HFD vs WT NCD	K03402	argR, ahrC; transcriptional regulator of arginine metabolism	0.00340524	0.0207238	3.46931	1.22648
WT HFD vs WT NCD	K03424	tatD; TatD DNase family protein [EC:3.1.21.-]	0.00534099	0.0207238	4.10893	2.48586
WT HFD vs WT NCD	K03427	hsdM; type I restriction enzyme M protein [EC:2.1.1.72]	0.00340524	0.0207238	3.01752	1.1287
WT HFD vs WT NCD	K03429	ugtP; processive 1,2-diacylglycerol beta-glucosyltransferase [EC:2.4.1.157 2.4.1.315]	0.00534099	0.0207238	5.7663	3.74702
WT HFD vs WT NCD	K03431	glmM; phosphoglucosamine mutase [EC:5.4.2.10]	0.00534099	0.0207238	5.73155	3.74074
WT HFD vs WT NCD	K03436	fruR2, fruR; DeoR family transcriptional regulator, fructose operon transcriptional repressor	0.00534099	0.0207238	5.81042	3.79047
WT HFD vs WT NCD	K03437	spoU; RNA methyltransferase, TrmH family	0.00534099	0.0207238	4.38051	2.65563
WT HFD vs WT NCD	K03438	mraW, rsmH; 16S rRNA (cytosine1402-N4)-methyltransferase [EC:2.1.1.199]	0.00534099	0.0207238	4.49876	2.7483
WT HFD vs WT NCD	K03439	trmB, METTL1; tRNA (guanine-N7-)-methyltransferase [EC:2.1.1.33]	0.00534099	0.0207238	4.49832	2.74791
WT HFD vs WT NCD	K03442	mscS; small conductance mechanosensitive channel	0.00534099	0.0207238	4.47773	2.73535
WT HFD vs WT NCD	K03444	MFS.SP; MFS transporter, SP family, sugar porter, other	0.00497016	0.0207238	#VALUE!	NA
WT HFD vs WT NCD	K03453	TC.BASS; bile acid:Na+ symporter, BASS family	0.00340524	0.0207238	-4.89523	2.00182
WT HFD vs WT NCD	K03455	TC.KEF; monovalent cation:H+ antiporter-2, CPA2 family	0.00534099	0.0207238	3.89636	2.41644
WT HFD vs WT NCD	K03465	E2.1.1.148, thyX, thy1; thymidylate synthase (FAD) [EC:2.1.1.148]	0.00336134	0.0207238	Inf	NA
WT HFD vs WT NCD	K03466	ftsK, spoIIIE; DNA segregation ATPase FtsK/SpoIIIE, S-DNA-T family	0.00534099	0.0207238	4.39729	2.74838
WT HFD vs WT NCD	K03469	rnhA, RNASEH1; ribonuclease HI [EC:3.1.26.4]	0.00534099	0.0207238	4.3898	2.77172
WT HFD vs WT NCD	K03470	rnhB; ribonuclease HII [EC:3.1.26.4]	0.00534099	0.0207238	4.42821	2.74953
WT HFD vs WT NCD	K03471	rnhC; ribonuclease HIII [EC:3.1.26.4]	0.00340524	0.0207238	7.4799	2.2865
WT HFD vs WT NCD	K03475	PTS-Ula-EIIC, ulaA, sgaT; PTS system, ascorbate-specific IIC component	0.00340524	0.0207238	6.3046	2.43132
WT HFD vs WT NCD	K03481	glvR; RpiR family transcriptional regulator, glv operon transcriptional regulator	0.00534099	0.0207238	5.72025	3.7788
WT HFD vs WT NCD	K03483	mtlR; mannitol operon transcriptional antiterminator	0.00340524	0.0207238	6.87119	1.95558
WT HFD vs WT NCD	K03484	scrR; LacI family transcriptional regulator, sucrose operon repressor	0.00534099	0.0207238	5.67686	3.7527
WT HFD vs WT NCD	K03486	treR2, treR; GntR family transcriptional regulator, trehalose operon transcriptional repressor	0.00534099	0.0207238	5.75434	3.33628
WT HFD vs WT NCD	K03488	licT, bglG; beta-glucoside operon transcriptional antiterminator	0.00534099	0.0207238	5.79448	3.68563
WT HFD vs WT NCD	K03489	yydK; GntR family transcriptional regulator, transcriptional regulator of bglA	0.00534099	0.0207238	5.93303	4.02398
WT HFD vs WT NCD	K03492	ydhQ; GntR family transcriptional regulator	0.00534099	0.0207238	5.96664	4.02136
WT HFD vs WT NCD	K03495	gidA, mnmG, MTO1; tRNA uridine 5-carboxymethylaminomethyl modification enzyme	0.00534099	0.0207238	4.50875	2.73439
WT HFD vs WT NCD	K03496	parA, soj; chromosome partitioning protein	0.00534099	0.0207238	4.25554	2.51951
WT HFD vs WT NCD	K03497	parB, spo0J; chromosome partitioning protein, ParB family	0.00534099	0.0207238	4.34661	2.61111
WT HFD vs WT NCD	K03499	trkA; trk system potassium uptake protein TrkA	0.00534099	0.0207238	2.17914	1.11171
WT HFD vs WT NCD	K03500	rsmB, sun; 16S rRNA (cytosine967-C5)-methyltransferase [EC:2.1.1.176]	0.00534099	0.0207238	5.71938	3.69746
WT HFD vs WT NCD	K03501	gidB, rsmG; 16S rRNA (guanine527-N7)-methyltransferase [EC:2.1.1.170]	0.00534099	0.0207238	4.58907	2.80467
WT HFD vs WT NCD	K03502	DPO5C, umuC; DNA polymerase V	0.00534099	0.0207238	3.67183	1.99507
WT HFD vs WT NCD	K03518	coxS; carbon-monoxide dehydrogenase small subunit [EC:1.2.99.2]	0.00534099	0.0207238	Inf	NA
WT HFD vs WT NCD	K03521	fixA, etfB; electron transfer flavoprotein beta subunit	0.00534099	0.0207238	2.69015	1.46165
WT HFD vs WT NCD	K03523	bioY; biotin transport system substrate-specific component	0.00340524	0.0207238	6.26344	2.09008
WT HFD vs WT NCD	K03524	birA; BirA family transcriptional regulator, biotin operon repressor / biotin-[acetyl-CoA-carboxylase] ligase [EC:6.3.4.15]	0.00340524	0.0207238	3.17072	1.1826
WT HFD vs WT NCD	K03525	coaX; type III pantothenate kinase [EC:2.7.1.33]	0.00534099	0.0207238	2.20125	1.02302
WT HFD vs WT NCD	K03529	smc; chromosome segregation protein	0.00534099	0.0207238	5.69508	3.70858
WT HFD vs WT NCD	K03530	hupB; DNA-binding protein HU-beta	0.00534099	0.0207238	3.53267	2.07374
WT HFD vs WT NCD	K03531	ftsZ; cell division protein FtsZ	0.00534099	0.0207238	4.34589	2.69806
WT HFD vs WT NCD	K03533	torD; TorA specific chaperone	0.00340524	0.0207238	4.78079	2.20923
WT HFD vs WT NCD	K03536	rnpA; ribonuclease P protein component [EC:3.1.26.5]	0.00534099	0.0207238	4.49832	2.74791
WT HFD vs WT NCD	K03544	clpX, CLPX; ATP-dependent Clp protease ATP-binding subunit ClpX	0.00534099	0.0207238	4.57018	2.75035
WT HFD vs WT NCD	K03545	tig; trigger factor	0.00534099	0.0207238	4.50208	2.74977
WT HFD vs WT NCD	K03546	sbcC; exonuclease SbcC	0.00340524	0.0207238	3.5149	1.56893
WT HFD vs WT NCD	K03547	sbcD; exonuclease SbcD	0.00340524	0.0207238	3.4858	1.53172
WT HFD vs WT NCD	K03549	kup; KUP system potassium uptake protein	0.00534099	0.0207238	5.99011	4.01617
WT HFD vs WT NCD	K03550	ruvA; holliday junction DNA helicase RuvA [EC:3.6.4.12]	0.00534099	0.0207238	4.50654	2.74332
WT HFD vs WT NCD	K03551	ruvB; holliday junction DNA helicase RuvB [EC:3.6.4.12]	0.00534099	0.0207238	4.5002	2.74884
WT HFD vs WT NCD	K03553	recA; recombination protein RecA	0.00534099	0.0207238	4.5002	2.74884
WT HFD vs WT NCD	K03555	mutS; DNA mismatch repair protein MutS	0.00534099	0.0207238	4.59861	2.79073
WT HFD vs WT NCD	K03558	cvpA; membrane protein required for colicin V production	0.00534099	0.0207238	-4.85902	2.60279
WT HFD vs WT NCD	K03564	BCP, PRXQ, DOT5; peroxiredoxin Q/BCP [EC:1.11.1.15]	0.00340524	0.0207238	-5.45972	1.67153
WT HFD vs WT NCD	K03565	recX; regulatory protein	0.00534099	0.0207238	4.50178	2.74974
WT HFD vs WT NCD	K03569	mreB; rod shape-determining protein MreB and related proteins	0.00534099	0.0207238	4.94725	3.08404
WT HFD vs WT NCD	K03570	mreC; rod shape-determining protein MreC	0.00534099	0.0207238	4.60045	2.7916
WT HFD vs WT NCD	K03571	mreD; rod shape-determining protein MreD	0.00534099	0.0207238	5.75175	3.73658
WT HFD vs WT NCD	K03572	mutL; DNA mismatch repair protein MutL	0.00534099	0.0207238	4.50941	2.7347
WT HFD vs WT NCD	K03574	mutT, NUDT15, MTH2; 8-oxo-dGTP diphosphatase [EC:3.6.1.55]	0.00534099	0.0207238	5.29013	3.2402
WT HFD vs WT NCD	K03575	mutY; A/G-specific adenine glycosylase [EC:3.2.2.-]	0.00340524	0.0207238	2.98982	1.17677
WT HFD vs WT NCD	K03581	recD; exodeoxyribonuclease V alpha subunit [EC:3.1.11.5]	0.00534099	0.0207238	5.38799	3.39933
WT HFD vs WT NCD	K03584	recO; DNA repair protein RecO (recombination protein O)	0.00534099	0.0207238	4.51543	2.80357
WT HFD vs WT NCD	K03588	ftsW, spoVE; cell division protein FtsW	0.00534099	0.0207238	4.7485	2.89232
WT HFD vs WT NCD	K03589	ftsQ; cell division protein FtsQ	0.00534099	0.0207238	4.61054	2.81889
WT HFD vs WT NCD	K03590	ftsA; cell division protein FtsA	0.00534099	0.0207238	4.52859	2.79107
WT HFD vs WT NCD	K03593	mrp, NUBPL; ATP-binding protein involved in chromosome partitioning	0.00340524	0.0207238	-5.37558	1.80842
WT HFD vs WT NCD	K03595	era; GTP-binding protein Era	0.00534099	0.0207238	4.5002	2.74884
WT HFD vs WT NCD	K03596	lepA; GTP-binding protein LepA	0.00534099	0.0207238	4.42777	2.74929
WT HFD vs WT NCD	K03601	xseA; exodeoxyribonuclease VII large subunit [EC:3.1.11.6]	0.00534099	0.0207238	4.58909	2.80468
WT HFD vs WT NCD	K03602	xseB; exodeoxyribonuclease VII small subunit [EC:3.1.11.6]	0.00534099	0.0207238	4.50271	2.7501
WT HFD vs WT NCD	K03621	plsX; glycerol-3-phosphate acyltransferase PlsX [EC:2.3.1.15]	0.00534099	0.0207238	5.37739	3.38607
WT HFD vs WT NCD	K03624	greA; transcription elongation factor GreA	0.00534099	0.0207238	4.89416	3.03503
WT HFD vs WT NCD	K03625	nusB; N utilization substance protein B	0.00534099	0.0207238	4.50033	2.74893
WT HFD vs WT NCD	K03629	recF; DNA replication and repair protein RecF	0.00534099	0.0207238	4.50121	2.74935
WT HFD vs WT NCD	K03630	radC; DNA repair protein RadC	0.00534099	0.0207238	4.38405	2.60375
WT HFD vs WT NCD	K03631	recN; DNA repair protein RecN (Recombination protein N)	0.00534099	0.0207238	4.50276	2.75084
WT HFD vs WT NCD	K03637	moaC; cyclic pyranopterin phosphate synthase [EC:4.1.99.18]	0.00340524	0.0207238	6.75332	1.67871
WT HFD vs WT NCD	K03639	MOCS1, moaA; cyclic pyranopterin phosphate synthase [EC:4.1.99.18]	0.00340524	0.0207238	3.28787	1.42909
WT HFD vs WT NCD	K03646	tolA; colicin import membrane protein	0.00336134	0.0207238	Inf	NA
WT HFD vs WT NCD	K03647	nrdI; protein involved in ribonucleotide reduction	0.00534099	0.0207238	5.54662	3.6807
WT HFD vs WT NCD	K03648	UNG, UDG; uracil-DNA glycosylase [EC:3.2.2.27]	0.00534099	0.0207238	4.29439	2.61074
WT HFD vs WT NCD	K03650	mnmE, trmE, MSS1; tRNA modification GTPase [EC:3.6.-.-]	0.00534099	0.0207238	4.50875	2.73439
WT HFD vs WT NCD	K03652	MPG; DNA-3-methyladenine glycosylase [EC:3.2.2.21]	0.00534099	0.0207238	5.61575	3.74062
WT HFD vs WT NCD	K03654	recQ; ATP-dependent DNA helicase RecQ [EC:3.6.4.12]	0.00534099	0.0207238	3.75167	2.24808
WT HFD vs WT NCD	K03655	recG; ATP-dependent DNA helicase RecG [EC:3.6.4.12]	0.00534099	0.0207238	4.1269	2.3996
WT HFD vs WT NCD	K03657	uvrD, pcrA; DNA helicase II / ATP-dependent DNA helicase PcrA [EC:3.6.4.12]	0.00534099	0.0207238	4.74708	2.92201
WT HFD vs WT NCD	K03664	smpB; SsrA-binding protein	0.00534099	0.0207238	4.5002	2.74884
WT HFD vs WT NCD	K03665	hflX; GTP-binding protein HflX	0.00534099	0.0207238	4.58989	2.8051
WT HFD vs WT NCD	K03667	hslU; ATP-dependent HslUV protease ATP-binding subunit HslU	0.00534099	0.0207238	5.77012	3.82686
WT HFD vs WT NCD	K03671	trxA; thioredoxin 1	0.00534099	0.0207238	4.02545	2.39142
WT HFD vs WT NCD	K03685	rnc, DROSHA, RNT1; ribonuclease III [EC:3.1.26.3]	0.00534099	0.0207238	4.58965	2.80496
WT HFD vs WT NCD	K03686	dnaJ; molecular chaperone DnaJ	0.00534099	0.0207238	4.55862	2.76323
WT HFD vs WT NCD	K03687	GRPE; molecular chaperone GrpE	0.00534099	0.0207238	4.59192	2.80691
WT HFD vs WT NCD	K03693	pbp; penicillin-binding protein	0.00534099	0.0207238	5.98958	4.00512
WT HFD vs WT NCD	K03695	clpB; ATP-dependent Clp protease ATP-binding subunit ClpB	0.00340524	0.0207238	2.98698	1.17613
WT HFD vs WT NCD	K03696	clpC; ATP-dependent Clp protease ATP-binding subunit ClpC	0.00534099	0.0207238	4.59189	2.80629
WT HFD vs WT NCD	K03697	clpE; ATP-dependent Clp protease ATP-binding subunit ClpE	0.00534099	0.0207238	5.86999	3.9592
WT HFD vs WT NCD	K03698	cbf, cbf1; 3'-5' exoribonuclease [EC:3.1.-.-]	0.00534099	0.0207238	5.90861	3.82625
WT HFD vs WT NCD	K03699	tlyC; putative hemolysin	0.00534099	0.0207238	4.5006	2.79318
WT HFD vs WT NCD	K03700	recU; recombination protein U	0.00534099	0.0207238	5.76206	3.74541
WT HFD vs WT NCD	K03701	uvrA; excinuclease ABC subunit A	0.00534099	0.0207238	4.48076	2.75691
WT HFD vs WT NCD	K03702	uvrB; excinuclease ABC subunit B	0.00534099	0.0207238	4.49763	2.74685
WT HFD vs WT NCD	K03703	uvrC; excinuclease ABC subunit C	0.00534099	0.0207238	4.50294	2.75087
WT HFD vs WT NCD	K03704	cspA; cold shock protein (beta-ribbon, CspA family)	0.00534099	0.0207238	5.10808	3.09999
WT HFD vs WT NCD	K03705	hrcA; heat-inducible transcriptional repressor	0.00534099	0.0207238	5.71153	3.71188
WT HFD vs WT NCD	K03706	codY; transcriptional pleiotropic repressor	0.00340524	0.0207238	8.05122	1.92116
WT HFD vs WT NCD	K03707	tenA; thiaminase (transcriptional activator TenA) [EC:3.5.99.2]	0.00534099	0.0207238	6.04316	3.14776
WT HFD vs WT NCD	K03708	ctsR; transcriptional regulator of stress and heat shock response	0.00340524	0.0207238	5.55542	1.84092
WT HFD vs WT NCD	K03709	troR; DtxR family transcriptional regulator, Mn-dependent transcriptional regulator	0.00340524	0.0207238	5.55259	1.84214
WT HFD vs WT NCD	K03710	K03710; GntR family transcriptional regulator	0.00534099	0.0207238	5.88417	3.97328
WT HFD vs WT NCD	K03711	fur; Fur family transcriptional regulator, ferric uptake regulator	0.00340524	0.0207238	2.74315	1.19126
WT HFD vs WT NCD	K03713	glnR; MerR family transcriptional regulator, glutamine synthetase repressor	0.00340524	0.0207238	7.47979	2.28641
WT HFD vs WT NCD	K03718	asnC; Lrp/AsnC family transcriptional regulator, regulator for asnA, asnC and gidA	0.00340524	0.0207238	-6.40594	1.88284
WT HFD vs WT NCD	K03719	lrp; Lrp/AsnC family transcriptional regulator, leucine-responsive regulatory protein	0.00340524	0.0207238	-4.73933	1.38112
WT HFD vs WT NCD	K03722	dinG; ATP-dependent DNA helicase DinG [EC:3.6.4.12]	0.00534099	0.0207238	5.76325	3.74588
WT HFD vs WT NCD	K03723	mfd; transcription-repair coupling factor (superfamily II helicase) [EC:3.6.4.-]	0.00534099	0.0207238	4.50078	2.74886
WT HFD vs WT NCD	K03724	lhr; ATP-dependent helicase Lhr and Lhr-like helicase [EC:3.6.4.-]	0.00534099	0.0207238	5.89734	4.0039
WT HFD vs WT NCD	K03731	E2.4.1.216; trehalose 6-phosphate phosphorylase [EC:2.4.1.216]	0.00323167	0.0207238	Inf	NA
WT HFD vs WT NCD	K03733	xerC; integrase/recombinase XerC	0.00534099	0.0207238	4.41791	2.78082
WT HFD vs WT NCD	K03734	apbE; thiamine biosynthesis lipoprotein	0.00534099	0.0207238	4.6433	2.74182
WT HFD vs WT NCD	K03737	por, nifJ; pyruvate-ferredoxin/flavodoxin oxidoreductase [EC:1.2.7.1 1.2.7.-]	0.00340524	0.0207238	3.52495	1.51043
WT HFD vs WT NCD	K03739	dltB; membrane protein involved in D-alanine export	0.00534099	0.0207238	5.6923	3.74598
WT HFD vs WT NCD	K03740	dltD; D-alanine transfer protein	0.00534099	0.0207238	5.6923	3.74598
WT HFD vs WT NCD	K03741	ARSC2, arsC; arsenate reductase [EC:1.20.4.1]	0.00340524	0.0207238	5.64937	1.86463
WT HFD vs WT NCD	K03742	pncC; nicotinamide-nucleotide amidase [EC:3.5.1.42]	0.00534099	0.0207238	-4.49482	1.44545
WT HFD vs WT NCD	K03743	pncC; nicotinamide-nucleotide amidase [EC:3.5.1.42]	0.00340524	0.0207238	-5.69405	1.85631
WT HFD vs WT NCD	K03744	lemA; LemA protein	0.00534099	0.0207238	4.33117	2.67363
WT HFD vs WT NCD	K03758	arcD, lysl, lysP; arginine:ornithine antiporter / lysine permease	0.00534099	0.0207238	5.51757	3.68306
WT HFD vs WT NCD	K03763	DPO3A2, polC; DNA polymerase III subunit alpha, Gram-positive type [EC:2.7.7.7]	0.00534099	0.0207238	5.86593	3.71451
WT HFD vs WT NCD	K03767	PPIA; peptidyl-prolyl cis-trans isomerase A (cyclophilin A) [EC:5.2.1.8]	0.00534099	0.0207238	6.53627	3.49528
WT HFD vs WT NCD	K03768	PPIB, ppiB; peptidyl-prolyl cis-trans isomerase B (cyclophilin B) [EC:5.2.1.8]	0.00534099	0.0207238	4.64001	2.82807
WT HFD vs WT NCD	K03777	dld; D-lactate dehydrogenase [EC:1.1.1.28]	0.00340524	0.0207238	Inf	NA
WT HFD vs WT NCD	K03778	ldhA; D-lactate dehydrogenase [EC:1.1.1.28]	0.00534099	0.0207238	4.22373	2.65609
WT HFD vs WT NCD	K03784	deoD; purine-nucleoside phosphorylase [EC:2.4.2.1]	0.00340524	0.0207238	5.1183	1.52431
WT HFD vs WT NCD	K03785	aroD; 3-dehydroquinate dehydratase I [EC:4.2.1.10]	0.00534099	0.0207238	5.98602	3.8082
WT HFD vs WT NCD	K03789	rimI; ribosomal-protein-alanine N-acetyltransferase [EC:2.3.1.128]	0.00534099	0.0207238	5.77299	3.70859
WT HFD vs WT NCD	K03790	rimJ; ribosomal-protein-alanine N-acetyltransferase [EC:2.3.1.128]	0.00534099	0.0207238	6.45298	6.01675
WT HFD vs WT NCD	K03797	E3.4.21.102, prc, ctpA; carboxyl-terminal processing protease [EC:3.4.21.102]	0.00534099	0.0207238	3.6348	2.2074
WT HFD vs WT NCD	K03798	ftsH, hflB; cell division protease FtsH [EC:3.4.24.-]	0.00534099	0.0207238	4.57085	2.7505
WT HFD vs WT NCD	K03799	htpX; heat shock protein HtpX [EC:3.4.24.-]	0.00534099	0.0207238	5.27845	3.40474
WT HFD vs WT NCD	K03810	mviM; virulence factor	0.00336134	0.0207238	Inf	NA
WT HFD vs WT NCD	K03811	pnuC; nicotinamide mononucleotide transporter	0.00534099	0.0207238	4.4909	2.74967
WT HFD vs WT NCD	K03816	xpt; xanthine phosphoribosyltransferase [EC:2.4.2.22]	0.00534099	0.0207238	4.53982	2.81856
WT HFD vs WT NCD	K03817	rimL; ribosomal-protein-serine acetyltransferase [EC:2.3.1.-]	0.00534099	0.0207238	5.3726	3.46458
WT HFD vs WT NCD	K03823	pat; phosphinothricin acetyltransferase [EC:2.3.1.183]	0.00340524	0.0207238	2.94573	1.19079
WT HFD vs WT NCD	K03826	yiaC; putative acetyltransferase [EC:2.3.1.-]	0.00534099	0.0207238	Inf	NA
WT HFD vs WT NCD	K03827	yjaB; putative acetyltransferase [EC:2.3.1.-]	0.00534099	0.0207238	4.67612	2.61865
WT HFD vs WT NCD	K03830	yafP; putative acetyltransferase [EC:2.3.1.-]	0.00340524	0.0207238	Inf	NA
WT HFD vs WT NCD	K03885	ndh; NADH dehydrogenase [EC:1.6.99.3]	0.00534099	0.0207238	3.60695	1.91136
WT HFD vs WT NCD	K03892	arsR; ArsR family transcriptional regulator	0.00340524	0.0207238	5.81974	2.43866
WT HFD vs WT NCD	K03924	moxR; MoxR-like ATPase [EC:3.6.3.-]	0.00340524	0.0207238	-6.30144	2.07384
WT HFD vs WT NCD	K03925	mraZ; MraZ protein	0.00534099	0.0207238	4.48595	2.82858
WT HFD vs WT NCD	K03930	estA; putative tributyrin esterase [EC:3.1.1.-]	0.00340524	0.0207238	9.83436	1.55794
WT HFD vs WT NCD	K03933	cpbD; chitin-binding protein	0.00340524	0.0207238	Inf	NA
WT HFD vs WT NCD	K03975	dedA; membrane-associated protein	0.00534099	0.0207238	4.77672	2.99919
WT HFD vs WT NCD	K03976	ybaK, ebsC; Cys-tRNA(Pro)/Cys-tRNA(Cys) deacylase [EC:3.1.1.-]	0.00534099	0.0207238	4.51463	2.73636
WT HFD vs WT NCD	K03977	engA; GTP-binding protein	0.00534099	0.0207238	4.58908	2.80468
WT HFD vs WT NCD	K03978	engB; GTP-binding protein	0.00534099	0.0207238	4.51114	2.73556
WT HFD vs WT NCD	K03979	obg; GTP-binding protein	0.00534099	0.0207238	4.5002	2.74884
WT HFD vs WT NCD	K04041	fbp3; fructose-1,6-bisphosphatase III [EC:3.1.3.11]	0.00340524	0.0207238	3.41927	1.82087
WT HFD vs WT NCD	K04042	glmU; bifunctional UDP-N-acetylglucosamine pyrophosphorylase / Glucosamine-1-phosphate N-acetyltransferase [EC:2.7.7.23 2.3.1.157]	0.00534099	0.0207238	5.74394	3.74024
WT HFD vs WT NCD	K04043	dnaK; molecular chaperone DnaK	0.00534099	0.0207238	4.58728	2.80391
WT HFD vs WT NCD	K04047	dps; starvation-inducible DNA-binding protein	0.00534099	0.0207238	4.52708	2.81019
WT HFD vs WT NCD	K04063	osmC; osmotically inducible protein OsmC	0.00340524	0.0207238	9.52325	1.48564
WT HFD vs WT NCD	K04066	priA; primosomal protein N' (replication factor Y) (superfamily II helicase) [EC:3.6.4.-]	0.00534099	0.0207238	4.42521	2.74731
WT HFD vs WT NCD	K04068	nrdG; anaerobic ribonucleoside-triphosphate reductase activating protein [EC:1.97.1.4]	0.00534099	0.0207238	4.16207	2.52483
WT HFD vs WT NCD	K04070	pflX; putative pyruvate formate lyase activating enzyme [EC:1.97.1.4]	0.00340524	0.0207238	Inf	NA
WT HFD vs WT NCD	K04072	adhE; acetaldehyde dehydrogenase / alcohol dehydrogenase [EC:1.2.1.10 1.1.1.1]	0.00534099	0.0207238	5.76397	3.85726
WT HFD vs WT NCD	K04074	divIVA; cell division initiation protein	0.00534099	0.0207238	5.68495	3.7441
WT HFD vs WT NCD	K04075	tilS, mesJ; tRNA(Ile)-lysidine synthase [EC:6.3.4.19]	0.00534099	0.0207238	4.50188	2.74952
WT HFD vs WT NCD	K04076	lonB; Lon-like ATP-dependent protease [EC:3.4.21.-]	0.00320244	0.0207238	Inf	NA
WT HFD vs WT NCD	K04077	groEL, HSPD1; chaperonin GroEL	0.00534099	0.0207238	4.49905	2.74808
WT HFD vs WT NCD	K04078	groES, HSPE1; chaperonin GroES	0.00534099	0.0207238	4.59192	2.80691
WT HFD vs WT NCD	K04083	hslO; molecular chaperone Hsp33	0.00534099	0.0207238	5.72695	3.70528
WT HFD vs WT NCD	K04094	trmFO, gid; methylenetetrahydrofolate--tRNA-(uracil-5-)-methyltransferase [EC:2.1.1.74]	0.00534099	0.0207238	5.80592	3.7835
WT HFD vs WT NCD	K04095	fic; cell filamentation protein	0.00534099	0.0207238	5.67665	3.72458
WT HFD vs WT NCD	K04096	smf; DNA processing protein	0.00534099	0.0207238	4.38824	2.74683
WT HFD vs WT NCD	K04103	E4.1.1.74, ipdC; indolepyruvate decarboxylase [EC:4.1.1.74]	0.00336134	0.0207238	7.01624	2.58878
WT HFD vs WT NCD	K04477	ycdX; putative hydrolase	0.00340524	0.0207238	-4.91936	1.9036
WT HFD vs WT NCD	K04485	sms, radA; DNA repair protein RadA/Sms	0.00534099	0.0207238	4.42337	2.74639
WT HFD vs WT NCD	K04486	E3.1.3.15B; histidinol-phosphatase (PHP family) [EC:3.1.3.15]	0.00340524	0.0207238	4.10473	1.66891
WT HFD vs WT NCD	K04487	iscS, NFS1; cysteine desulfurase [EC:2.8.1.7]	0.00534099	0.0207238	5.72172	3.72117
WT HFD vs WT NCD	K04488	iscU, nifU; nitrogen fixation protein NifU and related proteins	0.00534099	0.0207238	5.69986	3.69138
WT HFD vs WT NCD	K04517	tyrA2; prephenate dehydrogenase [EC:1.3.1.12]	0.00340524	0.0207238	4.82473	1.73181
WT HFD vs WT NCD	K04567	KARS, lysS; lysyl-tRNA synthetase, class II [EC:6.1.1.6]	0.00534099	0.0207238	4.50271	2.75001
WT HFD vs WT NCD	K04651	hypA, hybF; hydrogenase nickel incorporation protein HypA/HybF	0.00340524	0.0207238	7.14767	1.17744
WT HFD vs WT NCD	K04652	hypB; hydrogenase nickel incorporation protein HypB	0.00340524	0.0207238	7.17041	1.18701
WT HFD vs WT NCD	K04750	phnB; PhnB protein	0.00340524	0.0207238	5.22972	1.57175
WT HFD vs WT NCD	K04751	glnB; nitrogen regulatory protein P-II 1	0.00340524	0.0207238	3.83175	1.21193
WT HFD vs WT NCD	K04758	feoA; ferrous iron transport protein A	0.00340524	0.0207238	6.84182	2.73501
WT HFD vs WT NCD	K04759	feoB; ferrous iron transport protein B	0.00340524	0.0207238	3.43785	1.05513
WT HFD vs WT NCD	K04763	xerD; integrase/recombinase XerD	0.00534099	0.0207238	4.48431	2.73154
WT HFD vs WT NCD	K05311	cggR; central glycolytic genes regulator	0.00534099	0.0207238	5.78138	3.83779
WT HFD vs WT NCD	K05337	fer; ferredoxin	0.00340524	0.0207238	7.465	2.27364
WT HFD vs WT NCD	K05340	glcU; glucose uptake protein	0.00534099	0.0207238	4.3598	2.70102
WT HFD vs WT NCD	K05343	treS; maltose alpha-D-glucosyltransferase/ alpha-amylase [EC:5.4.99.16 3.2.1.1]	0.00340524	0.0207238	#VALUE!	NA
WT HFD vs WT NCD	K05349	bglX; beta-glucosidase [EC:3.2.1.21]	0.00340524	0.0207238	3.69036	1.0729
WT HFD vs WT NCD	K05350	bglB; beta-glucosidase [EC:3.2.1.21]	0.00534099	0.0207238	6.43692	5.80134
WT HFD vs WT NCD	K05363	murM; serine/alanine adding enzyme [EC:2.3.2.10]	0.00340524	0.0207238	9.24216	1.6682
WT HFD vs WT NCD	K05366	mrcA; penicillin-binding protein 1A [EC:2.4.1.- 3.4.-.-]	0.00534099	0.0207238	4.51008	2.735
WT HFD vs WT NCD	K05592	deaD, cshA; ATP-dependent RNA helicase DeaD [EC:3.6.4.13]	0.00534099	0.0207238	4.51473	2.73682
WT HFD vs WT NCD	K05601	hcp; hydroxylamine reductase [EC:1.7.99.1]	0.00534099	0.0207238	3.53414	1.85823
WT HFD vs WT NCD	K05780	phnL; alpha-D-ribose 1-methylphosphonate 5-triphosphate synthase subunit PhnL [EC:2.7.8.37]	0.00336134	0.0207238	Inf	NA
WT HFD vs WT NCD	K05781	phnK; putative phosphonate transport system ATP-binding protein	0.00336134	0.0207238	Inf	NA
WT HFD vs WT NCD	K05796	hydN; electron transport protein HydN	0.00336134	0.0207238	Inf	NA
WT HFD vs WT NCD	K05800	ybaO; Lrp/AsnC family transcriptional regulator	0.00534099	0.0207238	-4.63593	1.89493
WT HFD vs WT NCD	K05808	yhbH; putative sigma-54 modulation protein	0.00340524	0.0207238	3.09759	1.52243
WT HFD vs WT NCD	K05822	dapH, dapD; tetrahydrodipicolinate N-acetyltransferase [EC:2.3.1.89]	0.00534099	0.0207238	5.8096	3.95151
WT HFD vs WT NCD	K05823	E3.5.1.47; N-acetyldiaminopimelate deacetylase [EC:3.5.1.47]	0.00534099	0.0207238	5.78367	3.86499
WT HFD vs WT NCD	K05832	ABC.X4.P; putative ABC transport system permease protein	0.00534099	0.0207238	5.8944	3.91069
WT HFD vs WT NCD	K05833	ABC.X4.A; putative ABC transport system ATP-binding protein	0.00534099	0.0207238	5.8944	3.91069
WT HFD vs WT NCD	K05837	rodA, mrdB; rod shape determining protein RodA	0.00534099	0.0207238	4.4094	2.66655
WT HFD vs WT NCD	K05845	opuC; osmoprotectant transport system substrate-binding protein	0.00534099	0.0207238	5.51349	3.54918
WT HFD vs WT NCD	K05846	opuBD; osmoprotectant transport system permease protein	0.00534099	0.0207238	5.39469	3.48535
WT HFD vs WT NCD	K05847	opuA; osmoprotectant transport system ATP-binding protein	0.00534099	0.0207238	5.58835	3.62964
WT HFD vs WT NCD	K05878	dhaK; dihydroxyacetone kinase, N-terminal domain [EC:2.7.1.-]	0.00340524	0.0207238	4.66492	1.89552
WT HFD vs WT NCD	K05879	dhaL; dihydroxyacetone kinase, C-terminal domain [EC:2.7.1.-]	0.00340524	0.0207238	4.75119	1.93922
WT HFD vs WT NCD	K05896	scpA; segregation and condensation protein A	0.00534099	0.0207238	5.72794	3.70722
WT HFD vs WT NCD	K05910	npr; NADH peroxidase [EC:1.11.1.1]	0.00534099	0.0207238	5.93475	4.02412
WT HFD vs WT NCD	K05919	dfx; superoxide reductase [EC:1.15.1.2]	0.00527816	0.0207238	Inf	NA
WT HFD vs WT NCD	K05945	E2.4.1.58	0.00497016	0.0207238	#VALUE!	NA
WT HFD vs WT NCD	K05946	E2.4.1.187, tagA; N-acetylglucosaminyldiphosphoundecaprenol N-acetyl-beta-D-mannosaminyltransferase [EC:2.4.1.187]	0.00534099	0.0207238	4.70977	2.85651
WT HFD vs WT NCD	K05966	citG; triphosphoribosyl-dephospho-CoA synthase [EC:2.4.2.52]	0.00340524	0.0207238	9.21134	1.51211
WT HFD vs WT NCD	K05970	SIAE; sialate O-acetylesterase [EC:3.1.1.53]	0.00534099	0.0207238	3.1876	1.98145
WT HFD vs WT NCD	K05985	E3.1.26.8, rnmV; ribonuclease M5 [EC:3.1.26.8]	0.00534099	0.0207238	5.69024	3.74594
WT HFD vs WT NCD	K06023	hprK, ptsK; HPr kinase/phosphorylase [EC:2.7.11.- 2.7.4.-]	0.00534099	0.0207238	5.73029	3.70651
WT HFD vs WT NCD	K06024	scpB; segregation and condensation protein B	0.00534099	0.0207238	5.74985	3.73745
WT HFD vs WT NCD	K06131	cls; cardiolipin synthase [EC:2.7.8.-]	0.00534099	0.0207238	4.60971	2.8112
WT HFD vs WT NCD	K06147	ABCB-BAC; ATP-binding cassette, subfamily B, bacterial	0.00534099	0.0207238	4.61058	2.69681
WT HFD vs WT NCD	K06148	ABCC-BAC; ATP-binding cassette, subfamily C, bacterial	0.00534099	0.0207238	6.07149	3.88844
WT HFD vs WT NCD	K06153	bacA; undecaprenyl-diphosphatase [EC:3.6.1.27]	0.00340524	0.0207238	3.52262	1.09387
WT HFD vs WT NCD	K06158	ABCF3; ATP-binding cassette, subfamily F, member 3	0.00534099	0.0207238	4.08999	2.41464
WT HFD vs WT NCD	K06162	phnM; alpha-D-ribose 1-methylphosphonate 5-triphosphate diphosphatase [EC:3.6.1.63]	0.00336134	0.0207238	Inf	NA
WT HFD vs WT NCD	K06163	phnJ; alpha-D-ribose 1-methylphosphonate 5-phosphate C-P lyase [EC:4.7.1.1]	0.00336134	0.0207238	Inf	NA
WT HFD vs WT NCD	K06164	phnI; alpha-D-ribose 1-methylphosphonate 5-triphosphate synthase subunit PhnI [EC:2.7.8.37]	0.00336134	0.0207238	Inf	NA
WT HFD vs WT NCD	K06165	phnH; alpha-D-ribose 1-methylphosphonate 5-triphosphate synthase subunit PhnH [EC:2.7.8.37]	0.00336134	0.0207238	Inf	NA
WT HFD vs WT NCD	K06166	phnG; alpha-D-ribose 1-methylphosphonate 5-triphosphate synthase subunit PhnG [EC:2.7.8.37]	0.00336134	0.0207238	Inf	NA
WT HFD vs WT NCD	K06173	truA, PUS1; tRNA pseudouridine38-40 synthase [EC:5.4.99.12]	0.00534099	0.0207238	4.49847	2.74817
WT HFD vs WT NCD	K06177	rluA; tRNA pseudouridine32 synthase / 23S rRNA pseudouridine746 synthase [EC:5.4.99.28 5.4.99.29]	0.00340524	0.0207238	-6.10235	1.84621
WT HFD vs WT NCD	K06178	rluB; 23S rRNA pseudouridine2605 synthase [EC:5.4.99.22]	0.00534099	0.0207238	4.42766	2.74739
WT HFD vs WT NCD	K06180	rluD; 23S rRNA pseudouridine1911/1915/1917 synthase [EC:5.4.99.23]	0.00534099	0.0207238	4.50328	2.75285
WT HFD vs WT NCD	K06181	rluE; 23S rRNA pseudouridine2457 synthase [EC:5.4.99.20]	0.00340524	0.0207238	Inf	NA
WT HFD vs WT NCD	K06183	rsuA; 16S rRNA pseudouridine516 synthase [EC:5.4.99.19]	0.00534099	0.0207238	5.90551	3.82499
WT HFD vs WT NCD	K06187	recR; recombination protein RecR	0.00534099	0.0207238	4.5002	2.74884
WT HFD vs WT NCD	K06188	aqpZ; aquaporin Z	0.00340524	0.0207238	-3.4826	1.8121
WT HFD vs WT NCD	K06191	nrdH; glutaredoxin-like protein NrdH	0.00534099	0.0207238	4.77338	2.56464
WT HFD vs WT NCD	K06193	phnA; phosphonoacetate hydrolase [EC:3.11.1.2]	0.00340524	0.0207238	7.04838	2.07889
WT HFD vs WT NCD	K06196	ccdA; cytochrome c-type biogenesis protein	0.00340524	0.0207238	4.00462	2.1218
WT HFD vs WT NCD	K06198	coiA; competence protein CoiA	0.00534099	0.0207238	5.69233	3.74588
WT HFD vs WT NCD	K06199	crcB; CrcB protein	0.00534099	0.0207238	4.78183	3.05605
WT HFD vs WT NCD	K06200	cstA; carbon starvation protein	0.00340524	0.0207238	8.15717	3.7409
WT HFD vs WT NCD	K06201	cutC; copper homeostasis protein	0.00534099	0.0207238	3.03802	1.6457
WT HFD vs WT NCD	K06206	sfsA; sugar fermentation stimulation protein A	0.00340524	0.0207238	Inf	NA
WT HFD vs WT NCD	K06207	typA, bipA; GTP-binding protein	0.00534099	0.0207238	4.59301	2.8064
WT HFD vs WT NCD	K06215	pdxS, pdx1; pyridoxal 5'-phosphate synthase pdxS subunit [EC:4.3.3.6]	0.00340524	0.0207238	5.65057	2.93136
WT HFD vs WT NCD	K06216	rbsU; putative ribose uptake protein	0.00534099	0.0207238	5.93323	4.024
WT HFD vs WT NCD	K06217	phoH, phoL; phosphate starvation-inducible protein PhoH and related proteins	0.00534099	0.0207238	4.5014	2.74835
WT HFD vs WT NCD	K06286	ezrA; septation ring formation regulator	0.00534099	0.0207238	5.69224	3.74585
WT HFD vs WT NCD	K06333	cotJB; spore coat protein JB	0.00534099	0.0207238	Inf	NA
WT HFD vs WT NCD	K06346	jag; spoIIIJ-associated protein	0.00340524	0.0207238	5.83433	2.58683
WT HFD vs WT NCD	K06442	tlyA; 23S rRNA (cytidine1920-2'-O)/16S rRNA (cytidine1409-2'-O)-methyltransferase [EC:2.1.1.226 2.1.1.227]	0.00534099	0.0207238	5.75775	3.85502
WT HFD vs WT NCD	K06446	DCAA; acyl-CoA dehydrogenase [EC:1.3.99.-]	0.00336134	0.0207238	Inf	NA
WT HFD vs WT NCD	K06518	cidA; holin-like protein	0.00340524	0.0207238	3.58465	1.80647
WT HFD vs WT NCD	K06610	iolF; MFS transporter, SP family, inositol transporter	0.00336134	0.0207238	Inf	NA
WT HFD vs WT NCD	K06726	rbsD; D-ribose pyranase [EC:5.4.99.62]	0.00534099	0.0207238	5.69627	3.7531
WT HFD vs WT NCD	K06864	K06864; uncharacterized protein	0.00340524	0.0207238	7.52834	2.12294
WT HFD vs WT NCD	K06871	K06871; uncharacterized protein	0.00340524	0.0207238	-6.15649	2.2964
WT HFD vs WT NCD	K06872	K06872; uncharacterized protein	0.00340524	0.0207238	3.85441	1.87148
WT HFD vs WT NCD	K06878	K06878; tRNA-binding protein	0.00534099	0.0207238	5.6838	3.73681
WT HFD vs WT NCD	K06881	K06881; phosphoesterase RecJ domain-containing protein	0.00534099	0.0207238	4.58291	2.73808
WT HFD vs WT NCD	K06885	K06885	0.00534099	0.0207238	4.56736	2.81665
WT HFD vs WT NCD	K06889	K06889	0.00534099	0.0207238	4.18755	2.5811
WT HFD vs WT NCD	K06890	K06890	0.00534099	0.0207238	5.70054	3.8136
WT HFD vs WT NCD	K06898	K06898	0.00340524	0.0207238	7.5284	2.12299
WT HFD vs WT NCD	K06901	pbuG; putative MFS transporter, AGZA family, xanthine/uracil permease	0.00534099	0.0207238	5.82574	3.91063
WT HFD vs WT NCD	K06904	K06904	0.00534099	0.0207238	3.42264	2.07404
WT HFD vs WT NCD	K06909	xtmB; phage terminase large subunit	0.00331778	0.0207238	#VALUE!	NA
WT HFD vs WT NCD	K06910	K06910	0.00534099	0.0207238	5.69611	3.88434
WT HFD vs WT NCD	K06919	K06919; putative DNA primase/helicase	0.00340524	0.0207238	5.65501	1.73047
WT HFD vs WT NCD	K06921	K06921	0.00331778	0.0207238	#VALUE!	NA
WT HFD vs WT NCD	K06925	tsaE; tRNA threonylcarbamoyladenosine biosynthesis protein TsaE	0.00534099	0.0207238	4.5002	2.74884
WT HFD vs WT NCD	K06929	K06929	0.00340524	0.0207238	9.0251	1.4353
WT HFD vs WT NCD	K06940	K06940	0.00340524	0.0207238	9.16218	1.15624
WT HFD vs WT NCD	K06941	rlmN; 23S rRNA (adenine2503-C2)-methyltransferase [EC:2.1.1.192]	0.00534099	0.0207238	2.44996	1.21042
WT HFD vs WT NCD	K06942	K06942	0.00534099	0.0207238	4.58909	2.80468
WT HFD vs WT NCD	K06948	K06948	0.00534099	0.0207238	5.69224	3.74585
WT HFD vs WT NCD	K06949	rsgA, engC; ribosome biogenesis GTPase [EC:3.6.1.-]	0.00534099	0.0207238	4.60432	2.79447
WT HFD vs WT NCD	K06950	K06950; uncharacterized protein	0.00534099	0.0207238	4.20275	2.5511
WT HFD vs WT NCD	K06956	K06956	0.00534099	0.0207238	5.77179	3.83592
WT HFD vs WT NCD	K06958	yhbJ; UPF0042 nucleotide-binding protein	0.00534099	0.0207238	5.71121	3.71177
WT HFD vs WT NCD	K06959	K06959; uncharacterized protein	0.00340524	0.0207238	3.39574	1.80157
WT HFD vs WT NCD	K06960	K06960	0.00340524	0.0207238	5.70373	2.39181
WT HFD vs WT NCD	K06966	K06966	0.00534099	0.0207238	4.19815	2.61135
WT HFD vs WT NCD	K06967	trmK; tRNA (adenine22-N1)-methyltransferase [EC:2.1.1.217]	0.00534099	0.0207238	5.73527	3.71363
WT HFD vs WT NCD	K06969	rlmI; 23S rRNA (cytosine1962-C5)-methyltransferase [EC:2.1.1.191]	0.00340524	0.0207238	3.89227	1.65895
WT HFD vs WT NCD	K06972	K06972	0.00340524	0.0207238	Inf	NA
WT HFD vs WT NCD	K06973	K06973	0.00534099	0.0207238	4.50512	2.7694
WT HFD vs WT NCD	K06988	K06988	0.00340524	0.0207238	10.2479	1.56546
WT HFD vs WT NCD	K06994	K06994; putative drug exporter of the RND superfamily	0.00534099	0.0207238	5.67391	3.71878
WT HFD vs WT NCD	K06997	yggS, PROSC; PLP dependent protein	0.00340524	0.0207238	3.01991	1.18615
WT HFD vs WT NCD	K07005	K07005	0.00340524	0.0207238	4.07164	1.94943
WT HFD vs WT NCD	K07006	K07006	0.00534099	0.0207238	5.90638	4.01918
WT HFD vs WT NCD	K07007	K07007	0.00340524	0.0207238	5.97031	1.24659
WT HFD vs WT NCD	K07009	K07009	0.00534099	0.0207238	5.6504	3.72069
WT HFD vs WT NCD	K07010	K07010; putative glutamine amidotransferase	0.00534099	0.0207238	5.75016	3.90276
WT HFD vs WT NCD	K07012	cas3; CRISPR-associated endonuclease/helicase Cas3 [EC:3.1.-.- 3.6.4.-]	0.00340524	0.0207238	-6.16498	1.51569
WT HFD vs WT NCD	K07015	K07015	0.00534099	0.0207238	5.7414	3.71513
WT HFD vs WT NCD	K07023	K07023; putative hydrolases of HD superfamily	0.00534099	0.0207238	5.33208	3.4046
WT HFD vs WT NCD	K07024	K07024	0.00534099	0.0207238	5.24876	3.2894
WT HFD vs WT NCD	K07025	K07025; putative hydrolase of the HAD superfamily	0.00534099	0.0207238	4.0298	2.38573
WT HFD vs WT NCD	K07027	K07027	0.00534099	0.0207238	4.43266	2.67313
WT HFD vs WT NCD	K07029	dagK; diacylglycerol kinase (ATP) [EC:2.7.1.107]	0.00534099	0.0207238	4.59068	2.7758
WT HFD vs WT NCD	K07030	K07030	0.00534099	0.0207238	5.69564	3.71086
WT HFD vs WT NCD	K07032	K07032	0.00340524	0.0207238	7.34817	2.19624
WT HFD vs WT NCD	K07038	K07038; inner membrane protein	0.00534099	0.0207238	5.67357	3.71854
WT HFD vs WT NCD	K07040	K07040; uncharacterized protein	0.00534099	0.0207238	5.66677	3.74883
WT HFD vs WT NCD	K07042	ybeY, yqfG; probable rRNA maturation factor	0.00534099	0.0207238	5.70917	3.71101
WT HFD vs WT NCD	K07045	K07045	0.00534099	0.0207238	5.81754	3.86539
WT HFD vs WT NCD	K07050	AARSD1, ALAX; misacylated tRNA(Ala) deacylase [EC:3.1.1.-]	0.00534099	0.0207238	8.58903	4.38516
WT HFD vs WT NCD	K07052	K07052	0.00534099	0.0207238	4.92209	2.8978
WT HFD vs WT NCD	K07053	K07053	0.00340524	0.0207238	4.02629	1.69052
WT HFD vs WT NCD	K07056	rsmI; 16S rRNA (cytidine1402-2'-O)-methyltransferase [EC:2.1.1.198]	0.00534099	0.0207238	4.05089	2.45088
WT HFD vs WT NCD	K07058	K07058; membrane protein	0.00534099	0.0207238	4.72344	2.87915
WT HFD vs WT NCD	K07069	K07069	0.00336134	0.0207238	Inf	NA
WT HFD vs WT NCD	K07079	K07079	0.00340524	0.0207238	3.63118	1.73081
WT HFD vs WT NCD	K07082	K07082; UPF0755 protein	0.00534099	0.0207238	4.57278	2.79485
WT HFD vs WT NCD	K07088	K07088	0.00534099	0.0207238	5.71737	3.7473
WT HFD vs WT NCD	K07090	K07090	0.00534099	0.0207238	5.54824	3.51932
WT HFD vs WT NCD	K07095	K07095	0.00340524	0.0207238	3.88064	1.47586
WT HFD vs WT NCD	K07104	catE; catechol 2,3-dioxygenase [EC:1.13.11.2]	0.00340524	0.0207238	5.29329	2.44421
WT HFD vs WT NCD	K07105	K07105	0.00534099	0.0207238	8.63819	3.99515
WT HFD vs WT NCD	K07106	murQ; N-acetylmuramic acid 6-phosphate etherase [EC:4.2.1.126]	0.00534099	0.0207238	4.49893	2.76958
WT HFD vs WT NCD	K07118	K07118	0.00534099	0.0207238	5.04298	3.15789
WT HFD vs WT NCD	K07124	K07124	0.00534099	0.0207238	5.68073	3.6986
WT HFD vs WT NCD	K07126	K07126	0.00340524	0.0207238	4.5742	1.84704
WT HFD vs WT NCD	K07133	K07133	0.00340524	0.0207238	2.71111	1.03873
WT HFD vs WT NCD	K07137	K07137	0.00340524	0.0207238	4.14476	1.66267
WT HFD vs WT NCD	K07139	K07139	0.00340524	0.0207238	3.39033	1.48822
WT HFD vs WT NCD	K07146	K07146; UPF0176 protein	0.00340524	0.0207238	7.36559	2.18587
WT HFD vs WT NCD	K07147	yedY; sulfoxide reductase catalytic subunit YedY [EC:1.8.-.-]	0.00534099	0.0207238	3.71757	2.35012
WT HFD vs WT NCD	K07166	K07166; ACT domain-containing protein	0.00340524	0.0207238	5.84856	2.58823
WT HFD vs WT NCD	K07170	K07170; GAF domain-containing protein	0.00534099	0.0207238	4.61305	2.84129
WT HFD vs WT NCD	K07171	mazF, ndoA, chpA; mRNA interferase MazF [EC:3.1.-.-]	0.00534099	0.0207238	5.70162	3.68409
WT HFD vs WT NCD	K07173	luxS; S-ribosylhomocysteine lyase [EC:4.4.1.21]	0.00534099	0.0207238	4.91055	3.02872
WT HFD vs WT NCD	K07177	K07177; PDZ domain-containing protein	0.00534099	0.0207238	5.80121	3.90676
WT HFD vs WT NCD	K07185	tspO; tryptophan-rich sensory protein	0.00534099	0.0207238	3.21468	1.47633
WT HFD vs WT NCD	K07217	K07217; Mn-containing catalase	0.00336134	0.0207238	#VALUE!	NA
WT HFD vs WT NCD	K07238	TC.ZIP, zupT, ZRT3, ZIP2; zinc transporter, ZIP family	0.00340524	0.0207238	4.85119	1.50874
WT HFD vs WT NCD	K07240	chrA; chromate transporter	0.00340524	0.0207238	-5.72199	2.60208
WT HFD vs WT NCD	K07258	dacC, dacA, dacD; D-alanyl-D-alanine carboxypeptidase (penicillin-binding protein 5/6) [EC:3.4.16.4]	0.00534099	0.0207238	5.7306	3.65592
WT HFD vs WT NCD	K07259	dacB; D-alanyl-D-alanine carboxypeptidase / D-alanyl-D-alanine-endopeptidase (penicillin-binding protein 4) [EC:3.4.16.4 3.4.21.-]	0.00340524	0.0207238	-6.07925	1.89267
WT HFD vs WT NCD	K07260	vanY; D-alanyl-D-alanine carboxypeptidase [EC:3.4.16.4]	0.00340524	0.0207238	7.85196	1.8239
WT HFD vs WT NCD	K07271	licD; lipopolysaccharide cholinephosphotransferase [EC:2.7.8.-]	0.00340524	0.0207238	4.3398	1.46954
WT HFD vs WT NCD	K07272	rgpF; rhamnosyltransferase [EC:2.4.1.-]	0.00340524	0.0207238	8.65324	3.21193
WT HFD vs WT NCD	K07284	srtA; sortase A [EC:3.4.22.70]	0.00534099	0.0207238	5.86164	3.78521
WT HFD vs WT NCD	K07304	msrA; peptide-methionine (S)-S-oxide reductase [EC:1.8.4.11]	0.00534099	0.0207238	5.57307	3.54391
WT HFD vs WT NCD	K07305	msrB; peptide-methionine (R)-S-oxide reductase [EC:1.8.4.12]	0.00534099	0.0207238	5.68797	3.74323
WT HFD vs WT NCD	K07306	dmsA; anaerobic dimethyl sulfoxide reductase subunit A [EC:1.8.5.3]	0.00336134	0.0207238	Inf	NA
WT HFD vs WT NCD	K07307	dmsB; anaerobic dimethyl sulfoxide reductase subunit B (DMSO reductase iron- sulfur subunit)	0.00336134	0.0207238	Inf	NA
WT HFD vs WT NCD	K07308	dmsC; anaerobic dimethyl sulfoxide reductase subunit C (DMSO reductase anchor subunit)	0.00336134	0.0207238	Inf	NA
WT HFD vs WT NCD	K07309	ynfE; Tat-targeted selenate reductase subunit YnfE [EC:1.97.1.9]	0.00336134	0.0207238	Inf	NA
WT HFD vs WT NCD	K07310	ynfF; Tat-targeted selenate reductase subunit YnfF [EC:1.97.1.9]	0.00336134	0.0207238	Inf	NA
WT HFD vs WT NCD	K07313	pphA; serine/threonine protein phosphatase 1 [EC:3.1.3.16]	0.00340524	0.0207238	7.67919	1.87134
WT HFD vs WT NCD	K07316	mod; adenine-specific DNA-methyltransferase [EC:2.1.1.72]	0.00534099	0.0207238	4.68527	2.90572
WT HFD vs WT NCD	K07322	ytfE, scdA; regulator of cell morphogenesis and NO signaling	0.00340524	0.0207238	-6.26941	1.95319
WT HFD vs WT NCD	K07334	higA; proteic killer suppression protein	0.00534099	0.0207238	2.86965	1.77603
WT HFD vs WT NCD	K07335	bmpA, bmpB, tmpC; basic membrane protein A and related proteins	0.00534099	0.0207238	6.07739	3.93569
WT HFD vs WT NCD	K07386	pepO; putative endopeptidase [EC:3.4.24.-]	0.00534099	0.0207238	4.96625	3.12463
WT HFD vs WT NCD	K07402	xdhC; xanthine dehydrogenase accessory factor	0.00340524	0.0207238	8.08794	1.63571
WT HFD vs WT NCD	K07404	pgl; 6-phosphogluconolactonase [EC:3.1.1.31]	0.00534099	0.0207238	5.90392	3.92014
WT HFD vs WT NCD	K07407	E3.2.1.22B, galA, rafA; alpha-galactosidase [EC:3.2.1.22]	0.00534099	0.0207238	3.74978	2.1698
WT HFD vs WT NCD	K07443	ybaZ; methylated-DNA-protein-cysteine methyltransferase related protein	0.00340524	0.0207238	3.42454	2.14901
WT HFD vs WT NCD	K07444	ypsC; putative N6-adenine-specific DNA methylase [EC:2.1.1.-]	0.00534099	0.0207238	4.62452	2.80616
WT HFD vs WT NCD	K07447	ruvX; putative holliday junction resolvase [EC:3.1.-.-]	0.00534099	0.0207238	4.58921	2.80476
WT HFD vs WT NCD	K07452	mcrB; 5-methylcytosine-specific restriction enzyme B [EC:3.1.21.-]	0.00323167	0.0207238	Inf	NA
WT HFD vs WT NCD	K07456	mutS2; DNA mismatch repair protein MutS2	0.00534099	0.0207238	4.66982	2.79327
WT HFD vs WT NCD	K07459	ybjD; putative ATP-dependent endonuclease of the OLD family	0.00340524	0.0207238	-6.18117	1.9354
WT HFD vs WT NCD	K07461	K07461; putative endonuclease	0.00534099	0.0207238	5.37659	3.4566
WT HFD vs WT NCD	K07462	recJ; single-stranded-DNA-specific exonuclease [EC:3.1.-.-]	0.00534099	0.0207238	4.51063	2.73531
WT HFD vs WT NCD	K07464	cas4; CRISPR-associated exonuclease Cas4 [EC:3.1.12.1]	0.00340524	0.0207238	-6.44153	1.83543
WT HFD vs WT NCD	K07467	rstA1; phage replication initiation protein	0.00534099	0.0207238	Inf	NA
WT HFD vs WT NCD	K07473	dinJ; DNA-damage-inducible protein J	0.00534099	0.0207238	5.92658	3.98703
WT HFD vs WT NCD	K07474	xtmA; phage terminase small subunit	0.00534099	0.0207238	6.02395	4.00516
WT HFD vs WT NCD	K07478	ycaJ; putative ATPase	0.00534099	0.0207238	4.86394	3.0312
WT HFD vs WT NCD	K07482	K07482; transposase, IS30 family	0.00340524	0.0207238	9.43248	1.94646
WT HFD vs WT NCD	K07483	K07483; transposase	0.00340524	0.0207238	9.7599	1.81468
WT HFD vs WT NCD	K07491	K07491; putative transposase	0.00534099	0.0207238	4.70354	3.23668
WT HFD vs WT NCD	K07493	K07493; putative transposase	0.00323167	0.0207238	Inf	NA
WT HFD vs WT NCD	K07497	K07497; putative transposase	0.00336134	0.0207238	Inf	NA
WT HFD vs WT NCD	K07498	K07498; putative transposase	0.00340524	0.0207238	Inf	NA
WT HFD vs WT NCD	K07507	mgtC; putative Mg2+ transporter-C (MgtC) family protein	0.00534099	0.0207238	3.28619	1.54066
WT HFD vs WT NCD	K07533	prsA; foldase protein PrsA [EC:5.2.1.8]	0.00534099	0.0207238	5.85626	3.7451
WT HFD vs WT NCD	K07560	dtd, DTD1; D-tyrosyl-tRNA(Tyr) deacylase [EC:3.1.-.-]	0.00534099	0.0207238	4.51657	2.80314
WT HFD vs WT NCD	K07566	tsaC, rimN, SUA5; L-threonylcarbamoyladenylate synthase [EC:2.7.7.87]	0.00534099	0.0207238	4.52926	2.74979
WT HFD vs WT NCD	K07570	GSP13; general stress protein 13	0.00534099	0.0207238	5.9561	4.00736
WT HFD vs WT NCD	K07574	yhbY; RNA-binding protein	0.00340524	0.0207238	5.35743	2.08709
WT HFD vs WT NCD	K07584	K07584; hypothetical protein	0.00534099	0.0207238	5.87305	3.79535
WT HFD vs WT NCD	K07586	K07586; hypothetical protein	0.00534099	0.0207238	5.84168	3.82628
WT HFD vs WT NCD	K07652	vicK; two-component system, OmpR family, sensor histidine kinase VicK [EC:2.7.13.3]	0.00534099	0.0207238	5.69224	3.74585
WT HFD vs WT NCD	K07658	phoB1, phoP; two-component system, OmpR family, alkaline phosphatase synthesis response regulator PhoP	0.00336134	0.0207238	4.46821	1.29922
WT HFD vs WT NCD	K07665	cusR, copR, silR; two-component system, OmpR family, copper resistance phosphate regulon response regulator CusR	0.00534099	0.0207238	-6.33535	3.06264
WT HFD vs WT NCD	K07668	vicR; two-component system, OmpR family, response regulator VicR	0.00534099	0.0207238	5.69243	3.74587
WT HFD vs WT NCD	K07706	agrC; two-component system, AgrA family, sensor histidine kinase AgrC [EC:2.7.13.-]	0.00534099	0.0207238	5.83368	3.89956
WT HFD vs WT NCD	K07707	agrA; two-component system, AgrA family, response regulator AgrA	0.00534099	0.0207238	5.85912	3.93038
WT HFD vs WT NCD	K07726	K07726; putative transcriptional regulator	0.00340524	0.0207238	7.33322	2.14146
WT HFD vs WT NCD	K07727	K07727; putative transcriptional regulator	0.00340524	0.0207238	3.12638	1.51677
WT HFD vs WT NCD	K07729	K07729; putative transcriptional regulator	0.00340524	0.0207238	7.2424	1.9501
WT HFD vs WT NCD	K07736	carD; CarD family transcriptional regulator	0.00534099	0.0207238	6.40406	5.73106
WT HFD vs WT NCD	K07738	nrdR; transcriptional repressor NrdR	0.00534099	0.0207238	5.71251	3.71142
WT HFD vs WT NCD	K07739	ELP3, KAT9; elongator complex protein 3 [EC:2.3.1.48]	0.00323167	0.0207238	Inf	NA
WT HFD vs WT NCD	K07741	K07741; anti-repressor protein	0.00534099	0.0207238	5.62759	3.65864
WT HFD vs WT NCD	K07742	K07742; hypothetical protein	0.00534099	0.0207238	5.72942	3.70627
WT HFD vs WT NCD	K07749	frc; formyl-CoA transferase [EC:2.8.3.16]	0.00534099	0.0207238	5.72883	3.90443
WT HFD vs WT NCD	K07816	E2.7.6.5X; putative GTP pyrophosphokinase [EC:2.7.6.5]	0.00534099	0.0207238	5.81537	3.90622
WT HFD vs WT NCD	K07979	ytrA; GntR family transcriptional regulator	0.00340524	0.0207238	5.86594	3.15583
WT HFD vs WT NCD	K08151	tetA; MFS transporter, DHA1 family, tetracycline resistance protein	0.00340524	0.0207238	9.68471	1.39729
WT HFD vs WT NCD	K08152	lmrP; MFS transporter, DHA1 family, multidrug resistance protein B	0.00336134	0.0207238	Inf	NA
WT HFD vs WT NCD	K08153	blt, norA; MFS transporter, DHA1 family, multidrug resistance protein	0.00340524	0.0207238	5.24217	1.57756
WT HFD vs WT NCD	K08161	mdtG; MFS transporter, DHA1 family, multidrug resistance protein	0.00534099	0.0207238	5.87815	3.96927
WT HFD vs WT NCD	K08177	oxlT; MFS transporter, OFA family, oxalate/formate antiporter	0.00340524	0.0207238	4.82523	1.86784
WT HFD vs WT NCD	K08217	mef; MFS transporter, DHA3 family, macrolide efflux protein	0.00534099	0.0207238	3.52795	2.19293
WT HFD vs WT NCD	K08234	yaeR; glyoxylase I family protein	0.00340524	0.0207238	9.6488	1.466
WT HFD vs WT NCD	K08289	purT; phosphoribosylglycinamide formyltransferase 2 [EC:2.1.2.2]	0.00340524	0.0207238	-6.69026	1.70301
WT HFD vs WT NCD	K08303	K08303; putative protease [EC:3.4.-.-]	0.00340524	0.0207238	2.70948	1.1734
WT HFD vs WT NCD	K08311	nudH; putative (di)nucleoside polyphosphate hydrolase [EC:3.6.1.-]	0.00340524	0.0207238	9.31446	1.35553
WT HFD vs WT NCD	K08315	hycI; hydrogenase 3 maturation protease [EC:3.4.23.51]	0.00336134	0.0207238	Inf	NA
WT HFD vs WT NCD	K08316	rsmD; 16S rRNA (guanine966-N2)-methyltransferase [EC:2.1.1.171]	0.00534099	0.0207238	5.62373	3.86307
WT HFD vs WT NCD	K08317	ybdH; uncharacterized oxidoreductase [EC:1.1.-.-]	0.00534099	0.0207238	7.70932	4.15264
WT HFD vs WT NCD	K08321	lsrF; putative autoinducer-2 (AI-2) aldolase [EC:4.1.2.-]	0.00145409	0.0207238	#VALUE!	NA
WT HFD vs WT NCD	K08352	phsA, psrA; thiosulfate reductase / polysulfide reductase chain A	0.00323167	0.0207238	Inf	NA
WT HFD vs WT NCD	K08368	yaaU; MFS transporter, putative metabolite transport protein	0.00534099	0.0207238	5.83202	3.9649
WT HFD vs WT NCD	K08483	PTS-EI.PTSI, ptsI; phosphotransferase system, enzyme I, PtsI [EC:2.7.3.9]	0.00534099	0.0207238	5.65443	3.55056
WT HFD vs WT NCD	K08590	mtnU; carbon-nitrogen hydrolase family protein	0.00340524	0.0207238	-5.14203	1.57268
WT HFD vs WT NCD	K08591	plsY; glycerol-3-phosphate acyltransferase PlsY [EC:2.3.1.15]	0.00534099	0.0207238	5.43864	3.37557
WT HFD vs WT NCD	K08600	srtB; sortase B [EC:3.4.22.70]	0.00340524	0.0207238	8.12569	1.94078
WT HFD vs WT NCD	K08602	pepF, pepB; oligoendopeptidase F [EC:3.4.24.-]	0.00534099	0.0207238	5.93183	3.81537
WT HFD vs WT NCD	K08641	vanX; D-alanyl-D-alanine dipeptidase [EC:3.4.13.22]	0.00534099	0.0207238	-5.31757	1.72256
WT HFD vs WT NCD	K08659	pepDA, pepDB; dipeptidase [EC:3.4.-.-]	0.00534099	0.0207238	5.80335	3.93233
WT HFD vs WT NCD	K08680	menH; 2-succinyl-6-hydroxy-2,4-cyclohexadiene-1-carboxylate synthase [EC:4.2.99.20]	0.00340524	0.0207238	7.49505	2.3109
WT HFD vs WT NCD	K08681	pdxT, pdx2; 5'-phosphate synthase pdxT subunit [EC:4.3.3.6]	0.00340524	0.0207238	5.65082	2.93143
WT HFD vs WT NCD	K08724	pbpB; penicillin-binding protein 2B	0.00534099	0.0207238	5.76299	3.92414
WT HFD vs WT NCD	K08728	E2.4.2.6; nucleoside deoxyribosyltransferase [EC:2.4.2.6]	0.00534099	0.0207238	5.00122	3.45606
WT HFD vs WT NCD	K08884	K08884; serine/threonine protein kinase, bacterial [EC:2.7.11.1]	0.00534099	0.0207238	5.71136	3.68059
WT HFD vs WT NCD	K08963	mtnA; methylthioribose-1-phosphate isomerase [EC:5.3.1.23]	0.00340524	0.0207238	7.35971	1.2422
WT HFD vs WT NCD	K08978	TC.BAT1; bacterial/archaeal transporter family protein	0.00340524	0.0207238	-4.52813	1.32001
WT HFD vs WT NCD	K08987	K08987; putative membrane protein	0.00534099	0.0207238	5.8343	3.90335
WT HFD vs WT NCD	K08996	yagU; putative membrane protein	0.00534099	0.0207238	5.66443	3.7548
WT HFD vs WT NCD	K08998	K08998; hypothetical protein	0.00534099	0.0207238	4.55071	2.81314
WT HFD vs WT NCD	K09013	sufC; Fe-S cluster assembly ATP-binding protein	0.00534099	0.0207238	4.4263	2.69025
WT HFD vs WT NCD	K09014	sufB; Fe-S cluster assembly protein SufB	0.00534099	0.0207238	4.42581	2.69054
WT HFD vs WT NCD	K09015	sufD; Fe-S cluster assembly protein SufD	0.00534099	0.0207238	4.34367	2.68874
WT HFD vs WT NCD	K09116	K09116; hypothetical protein	0.00320244	0.0207238	Inf	NA
WT HFD vs WT NCD	K09117	K09117; hypothetical protein	0.00534099	0.0207238	4.46867	2.75036
WT HFD vs WT NCD	K09121	K09121; hypothetical protein	0.00340524	0.0207238	7.48329	2.09436
WT HFD vs WT NCD	K09125	K09125; hypothetical protein	0.00340524	0.0207238	-5.10856	1.89628
WT HFD vs WT NCD	K09134	K09134; hypothetical protein	0.00534099	0.0207238	5.91612	4.00548
WT HFD vs WT NCD	K09138	K09138; hypothetical protein	0.00327456	0.0207238	Inf	NA
WT HFD vs WT NCD	K09153	K09153; hypothetical protein	0.00331778	0.0207238	Inf	NA
WT HFD vs WT NCD	K09155	K09155; hypothetical protein	0.00534099	0.0207238	5.33885	3.39937
WT HFD vs WT NCD	K09157	K09157; hypothetical protein	0.00340524	0.0207238	5.71767	2.39396
WT HFD vs WT NCD	K09384	K09384; hypothetical protein	0.00534099	0.0207238	5.83335	3.96775
WT HFD vs WT NCD	K09458	fabF; 3-oxoacyl-[acyl-carrier-protein] synthase II [EC:2.3.1.179]	0.00340524	0.0207238	3.32003	1.51659
WT HFD vs WT NCD	K09469	aepZ; 2-aminoethylphosphonate-pyruvate transaminase	0.00497016	0.0207238	#VALUE!	NA
WT HFD vs WT NCD	K09680	coaW; type II pantothenate kinase [EC:2.7.1.33]	0.00340524	0.0207238	-5.27433	1.67468
WT HFD vs WT NCD	K09685	purR; purine operon repressor	0.00534099	0.0207238	5.69218	3.74582
WT HFD vs WT NCD	K09692	tagG; teichoic acid transport system permease protein	0.00336134	0.0207238	6.57263	2.3843
WT HFD vs WT NCD	K09693	tagH; teichoic acid transport system ATP-binding protein [EC:3.6.3.40]	0.00340524	0.0207238	7.33547	2.25303
WT HFD vs WT NCD	K09698	gltX; nondiscriminating glutamyl-tRNA synthetase [EC:6.1.1.24]	0.00534099	0.0207238	5.69237	3.7459
WT HFD vs WT NCD	K09704	K09704; hypothetical protein	0.00340524	0.0207238	3.68617	1.22383
WT HFD vs WT NCD	K09710	ybeB; ribosome-associated protein	0.00534099	0.0207238	4.50111	2.74829
WT HFD vs WT NCD	K09747	K09747; hypothetical protein	0.00534099	0.0207238	5.72538	3.70477
WT HFD vs WT NCD	K09748	rimP; ribosome maturation factor RimP	0.00534099	0.0207238	4.51484	2.73797
WT HFD vs WT NCD	K09762	K09762; hypothetical protein	0.00534099	0.0207238	5.71995	3.7201
WT HFD vs WT NCD	K09765	K09765; hypothetical protein	0.00340524	0.0207238	4.53428	1.64246
WT HFD vs WT NCD	K09767	K09767; hypothetical protein	0.00340524	0.0207238	Inf	NA
WT HFD vs WT NCD	K09772	sepF; cell division inhibitor SepF	0.00534099	0.0207238	5.71995	3.7201
WT HFD vs WT NCD	K09773	K09773; hypothetical protein	0.00534099	0.0207238	5.67092	3.71753
WT HFD vs WT NCD	K09775	K09775; hypothetical protein	0.00336134	0.0207238	9.67463	1.72765
WT HFD vs WT NCD	K09779	K09779; hypothetical protein	0.00534099	0.0207238	Inf	NA
WT HFD vs WT NCD	K09787	K09787; hypothetical protein	0.00534099	0.0207238	5.6625	3.71307
WT HFD vs WT NCD	K09799	K09799; hypothetical protein	0.00340524	0.0207238	10.1602	1.42032
WT HFD vs WT NCD	K09809	tagF; CDP-glycerol glycerophosphotransferase [EC:2.7.8.12]	0.00340524	0.0207238	8.06281	1.78368
WT HFD vs WT NCD	K09811	ftsX; cell division transport system permease protein	0.00340524	0.0207238	3.01338	1.14248
WT HFD vs WT NCD	K09812	ftsE; cell division transport system ATP-binding protein	0.00340524	0.0207238	3.012	1.14166
WT HFD vs WT NCD	K09861	K09861; hypothetical protein	0.00534099	0.0207238	4.38668	2.748
WT HFD vs WT NCD	K09903	pyrH; uridylate kinase [EC:2.7.4.22]	0.00534099	0.0207238	4.50022	2.74885
WT HFD vs WT NCD	K09927	K09927; hypothetical protein	0.00336134	0.0207238	8.92463	1.38403
WT HFD vs WT NCD	K09936	TC.BAT2; bacterial/archaeal transporter family-2 protein	0.00340524	0.0207238	6.93324	2.00524
WT HFD vs WT NCD	K09952	csn1, cas9; CRISPR-associated endonuclease Csn1 [EC:3.1.-.-]	0.00534099	0.0207238	5.25475	3.35496
WT HFD vs WT NCD	K09962	K09962; hypothetical protein	0.00340524	0.0207238	9.66339	1.54469
WT HFD vs WT NCD	K09963	K09963; hypothetical protein	0.00534099	0.0207238	5.91514	3.91312
WT HFD vs WT NCD	K09976	K09976; hypothetical protein	0.00534099	0.0207238	5.69224	3.74585
WT HFD vs WT NCD	K10039	ABC.GLN1.S; putative glutamine transport system substrate-binding protein	0.00534099	0.0207238	5.83908	3.96521
WT HFD vs WT NCD	K10040	ABC.GLN1.P; putative glutamine transport system permease protein	0.00534099	0.0207238	5.75398	3.91224
WT HFD vs WT NCD	K10041	ABC.GLN1.A; putative glutamine transport system ATP-binding protein [EC:3.6.3.-]	0.00534099	0.0207238	5.75386	3.912
WT HFD vs WT NCD	K10112	msmX, msmK, malK, sugC, ggtA, msiK; multiple sugar transport system ATP-binding protein	0.00534099	0.0207238	5.95284	3.96557
WT HFD vs WT NCD	K10117	msmE; raffinose/stachyose/melibiose transport system substrate-binding protein	0.00534099	0.0207238	7.09616	4.47545
WT HFD vs WT NCD	K10254	ohyA, sph; oleate hydratase [EC:4.2.1.53]	0.00534099	0.0207238	5.85065	3.86854
WT HFD vs WT NCD	K10353	E2.7.1.76, dak; deoxyadenosine kinase [EC:2.7.1.76]	0.00534099	0.0207238	5.93303	4.02398
WT HFD vs WT NCD	K10439	rbsB; ribose transport system substrate-binding protein	0.00534099	0.0207238	4.9443	3.00921
WT HFD vs WT NCD	K10440	rbsC; ribose transport system permease protein	0.00340524	0.0207238	7.58372	1.98666
WT HFD vs WT NCD	K10441	rbsA; ribose transport system ATP-binding protein [EC:3.6.3.17]	0.00340524	0.0207238	8.26038	2.01666
WT HFD vs WT NCD	K10536	aguA; agmatine deiminase [EC:3.5.3.12]	0.00340524	0.0207238	9.73542	1.99832
WT HFD vs WT NCD	K10563	mutM, fpg; formamidopyrimidine-DNA glycosylase [EC:3.2.2.23 4.2.99.18]	0.00534099	0.0207238	5.5334	3.57941
WT HFD vs WT NCD	K10716	kch, trkA, mthK, pch; voltage-gated potassium channel	0.00534099	0.0207238	4.83356	3.05188
WT HFD vs WT NCD	K10773	NTH; endonuclease III [EC:4.2.99.18]	0.00534099	0.0207238	4.49906	2.74828
WT HFD vs WT NCD	K10823	oppF; oligopeptide transport system ATP-binding protein	0.00340524	0.0207238	8.20692	1.99613
WT HFD vs WT NCD	K10907	K10907; aminotransferase [EC:2.6.1.-]	0.00534099	0.0207238	Inf	NA
WT HFD vs WT NCD	K10947	padR; PadR family transcriptional regulator, regulatory protein PadR	0.00340524	0.0207238	3.43598	1.75558
WT HFD vs WT NCD	K11041	eta; exfoliative toxin A/B	0.00340524	0.0207238	8.60626	2.40693
WT HFD vs WT NCD	K11050	ABC-2.CYL.A, cylA; multidrug/hemolysin transport system ATP-binding protein	0.00534099	0.0207238	5.72772	3.89712
WT HFD vs WT NCD	K11051	ABC-2.CYL.P, cylB; multidrug/hemolysin transport system permease protein	0.00534099	0.0207238	5.72772	3.89712
WT HFD vs WT NCD	K11065	tpx; thiol peroxidase, atypical 2-Cys peroxiredoxin [EC:1.11.1.15]	0.00534099	0.0207238	4.41582	2.70859
WT HFD vs WT NCD	K11068	hlyIII; hemolysin III	0.00534099	0.0207238	4.49551	2.76301
WT HFD vs WT NCD	K11069	potD; spermidine/putrescine transport system substrate-binding protein	0.00534099	0.0207238	4.62234	2.80557
WT HFD vs WT NCD	K11070	potC; spermidine/putrescine transport system permease protein	0.00534099	0.0207238	4.62234	2.80557
WT HFD vs WT NCD	K11071	potB; spermidine/putrescine transport system permease protein	0.00534099	0.0207238	4.62234	2.80557
WT HFD vs WT NCD	K11072	potA; spermidine/putrescine transport system ATP-binding protein [EC:3.6.3.31]	0.00534099	0.0207238	4.62234	2.80557
WT HFD vs WT NCD	K11144	dnaI; primosomal protein DnaI	0.00534099	0.0207238	5.72098	3.77926
WT HFD vs WT NCD	K11145	K11145; ribonuclease III family protein [EC:3.1.26.-]	0.00534099	0.0207238	5.73644	3.71403
WT HFD vs WT NCD	K11175	purN; phosphoribosylglycinamide formyltransferase 1 [EC:2.1.2.2]	0.00340524	0.0207238	3.47706	1.77573
WT HFD vs WT NCD	K11189	PTS-HPR; phosphocarrier protein	0.00534099	0.0207238	5.89343	3.6791
WT HFD vs WT NCD	K11358	yhdR; aspartate aminotransferase [EC:2.6.1.1]	0.00340524	0.0207238	Inf	NA
WT HFD vs WT NCD	K11381	bkdA; 2-oxoisovalerate dehydrogenase E1 component [EC:1.2.4.4]	0.00340524	0.0207238	#VALUE!	NA
WT HFD vs WT NCD	K11617	liaS; two-component system, NarL family, sensor histidine kinase LiaS [EC:2.7.13.3]	0.00340524	0.0207238	9.74213	1.5627
WT HFD vs WT NCD	K11704	mtsA; iron/zinc/copper transport system substrate-binding protein	0.00340524	0.0207238	6.60411	2.32113
WT HFD vs WT NCD	K11705	mtsB; iron/zinc/copper transport system permease protein	0.00340524	0.0207238	7.48111	2.27901
WT HFD vs WT NCD	K11706	mtsC; iron/zinc/copper transport system ATP-binding protein	0.00340524	0.0207238	7.48111	2.27901
WT HFD vs WT NCD	K11717	sufS; cysteine desulfurase / selenocysteine lyase [EC:2.8.1.7 4.4.1.16]	0.00534099	0.0207238	4.34498	2.69057
WT HFD vs WT NCD	K11733	lysP; lysine-specific permease	0.00340524	0.0207238	5.72646	1.98556
WT HFD vs WT NCD	K11741	sugE; quaternary ammonium compound-resistance protein SugE	0.00340524	0.0207238	4.64788	1.59237
WT HFD vs WT NCD	K11749	rseP; regulator of sigma E protease [EC:3.4.24.-]	0.00534099	0.0207238	4.60488	2.79452
WT HFD vs WT NCD	K11752	ribD; diaminohydroxyphosphoribosylaminopyrimidine deaminase / 5-amino-6-(5-phosphoribosylamino)uracil reductase [EC:3.5.4.26 1.1.1.193]	0.00340524	0.0207238	3.33505	1.94039
WT HFD vs WT NCD	K11753	ribF; riboflavin kinase / FMN adenylyltransferase [EC:2.7.1.26 2.7.7.2]	0.00534099	0.0207238	4.50276	2.75084
WT HFD vs WT NCD	K11754	folC; dihydrofolate synthase / folylpolyglutamate synthase [EC:6.3.2.12 6.3.2.17]	0.00534099	0.0207238	4.44631	2.71706
WT HFD vs WT NCD	K11755	hisIE; phosphoribosyl-ATP pyrophosphohydrolase / phosphoribosyl-AMP cyclohydrolase [EC:3.6.1.31 3.5.4.19]	0.00340524	0.0207238	3.72141	2.00383
WT HFD vs WT NCD	K11928	putP; sodium/proline symporter	0.00340524	0.0207238	6.11629	1.92344
WT HFD vs WT NCD	K11991	tadA; tRNA(adenine34) deaminase [EC:3.5.4.33]	0.00534099	0.0207238	5.74826	3.75169
WT HFD vs WT NCD	K12136	hyfA; hydrogenase-4 component A [EC:1.-.-.-]	0.00323167	0.0207238	Inf	NA
WT HFD vs WT NCD	K12138	hyfC; hydrogenase-4 component C [EC:1.-.-.-]	0.00323167	0.0207238	Inf	NA
WT HFD vs WT NCD	K12143	hyfH; hydrogenase-4 component H	0.00323167	0.0207238	Inf	NA
WT HFD vs WT NCD	K12267	msrAB; peptide methionine sulfoxide reductase msrA/msrB [EC:1.8.4.11 1.8.4.12]	0.00340524	0.0207238	#VALUE!	NA
WT HFD vs WT NCD	K12268	asp1; accessory secretory protein Asp1	0.00534099	0.0207238	5.93282	4.0239
WT HFD vs WT NCD	K12269	asp2; accessory secretory protein Asp2	0.00534099	0.0207238	5.93282	4.0239
WT HFD vs WT NCD	K12270	asp3; accessory secretory protein Asp3	0.00534099	0.0207238	5.93282	4.0239
WT HFD vs WT NCD	K12296	comX1_2; competence protein ComX	0.00336134	0.0207238	9.9859	1.33261
WT HFD vs WT NCD	K12297	rlmL, rlmK; 23S rRNA (guanine2445-N2)-methyltransferase / 23S rRNA (guanine2069-N7)-methyltransferase [EC:2.1.1.173 2.1.1.264]	0.00336134	0.0207238	Inf	NA
WT HFD vs WT NCD	K12308	bgaB, lacA; beta-galactosidase [EC:3.2.1.23]	0.00534099	0.0207238	4.51244	2.75911
WT HFD vs WT NCD	K12410	npdA; NAD-dependent deacetylase [EC:3.5.1.-]	0.00534099	0.0207238	4.77304	2.99003
WT HFD vs WT NCD	K12452	rfbH; CDP-6-deoxy-D-xylo-4-hexulose-3-dehydrase	0.00497016	0.0207238	#VALUE!	NA
WT HFD vs WT NCD	K12454	rfbE; CDP-paratose 2-epimerase [EC:5.1.3.10]	0.00422206	0.0207238	#VALUE!	NA
WT HFD vs WT NCD	K12507	fadK; acyl-CoA synthetase [EC:6.2.1.-]	0.00336134	0.0207238	Inf	NA
WT HFD vs WT NCD	K12510	tadB; tight adherence protein B	0.00340524	0.0207238	Inf	NA
WT HFD vs WT NCD	K12511	tadC; tight adherence protein C	0.00340524	0.0207238	Inf	NA
WT HFD vs WT NCD	K12555	pbp2A; penicillin-binding protein 2A [EC:2.4.1.129 2.3.2.-]	0.00534099	0.0207238	5.82177	3.90746
WT HFD vs WT NCD	K12556	pbp2X; penicillin-binding protein 2X [EC:2.3.2.-]	0.00340524	0.0207238	9.80414	1.54289
WT HFD vs WT NCD	K12573	rnr, vacB; ribonuclease R [EC:3.1.-.-]	0.00534099	0.0207238	4.57557	2.7383
WT HFD vs WT NCD	K12574	rnj; ribonuclease J [EC:3.1.-.-]	0.00534099	0.0207238	5.5352	3.56871
WT HFD vs WT NCD	K12700	rihC; non-specific riboncleoside hydrolase [EC:3.2.-.-]	0.00534099	0.0207238	5.67623	3.77216
WT HFD vs WT NCD	K12942	abgT; aminobenzoyl-glutamate transport protein	0.00340524	0.0207238	-5.51973	1.91569
WT HFD vs WT NCD	K12960	mtaD; 5-methylthioadenosine/S-adenosylhomocysteine deaminase [EC:3.5.4.31 3.5.4.28]	0.00340524	0.0207238	4.71161	1.44875
WT HFD vs WT NCD	K12996	rgpA; rhamnosyltransferase [EC:2.4.1.-]	0.00336134	0.0207238	9.9859	1.33261
WT HFD vs WT NCD	K12997	rgpB; rhamnosyltransferase [EC:2.4.1.-]	0.00336134	0.0207238	10.0122	1.33909
WT HFD vs WT NCD	K13001	wbyK; mannosyltransferase [EC:2.4.1.-]	0.00497016	0.0207238	#VALUE!	NA
WT HFD vs WT NCD	K13018	wbpD, wlbB; UDP-2-acetamido-3-amino-2,3-dideoxy-glucuronate N-acetyltransferase [EC:2.3.1.201]	0.00145409	0.0207238	#VALUE!	NA
WT HFD vs WT NCD	K13038	coaBC, dfp; phosphopantothenoylcysteine decarboxylase / phosphopantothenate--cysteine ligase [EC:4.1.1.36 6.3.2.5]	0.00534099	0.0207238	4.53911	2.79292
WT HFD vs WT NCD	K13051	iaaA, ASRGL1; beta-aspartyl-peptidase (threonine type) [EC:3.4.19.5]	0.00340524	0.0207238	-6.06771	1.55244
WT HFD vs WT NCD	K13052	divIC, divA; cell division protein DivIC	0.00534099	0.0207238	5.55267	3.35364
WT HFD vs WT NCD	K13252	ptcA; putrescine carbamoyltransferase [EC:2.1.3.6]	0.00336134	0.0207238	9.09712	1.62541
WT HFD vs WT NCD	K13256	psiE; protein PsiE	0.00534099	0.0207238	5.82059	3.90483
WT HFD vs WT NCD	K13280	SEC11, sipW; signal peptidase, endoplasmic reticulum-type [EC:3.4.-.-]	0.00323167	0.0207238	Inf	NA
WT HFD vs WT NCD	K13292	lgt, umpA; phosphatidylglycerol:prolipoprotein diacylglycerol transferase [EC:2.-.-.-]	0.00534099	0.0207238	5.72555	3.70483
WT HFD vs WT NCD	K13530	adaA; AraC family transcriptional regulator, regulatory protein of adaptative response / methylphosphotriester-DNA alkyltransferase methyltransferase [EC:2.1.1.-]	0.00340524	0.0207238	Inf	NA
WT HFD vs WT NCD	K13531	adaB; methylated-DNA-[protein]-cysteine S-methyltransferase [EC:2.1.1.63]	0.00534099	0.0207238	5.93301	4.02393
WT HFD vs WT NCD	K13653	K13653; AraC family transcriptional regulator	0.00336134	0.0207238	Inf	NA
WT HFD vs WT NCD	K13678	cpoA; 1,2-diacylglycerol-3-alpha-glucose alpha-1,2-galactosyltransferase [EC:2.4.1.-]	0.00534099	0.0207238	5.76299	3.92414
WT HFD vs WT NCD	K13727	pdc; phenolic acid decarboxylase [EC:4.1.1.-]	0.00534099	0.0207238	5.98123	4.02058
WT HFD vs WT NCD	K13789	GGPS; geranylgeranyl diphosphate synthase, type II [EC:2.5.1.1 2.5.1.10 2.5.1.29]	0.00534099	0.0207238	4.51024	2.73515
WT HFD vs WT NCD	K13953	adhP; alcohol dehydrogenase, propanol-preferring [EC:1.1.1.1]	0.00340524	0.0207238	5.36725	2.33474
WT HFD vs WT NCD	K13993	HSP20; HSP20 family protein	0.00534099	0.0207238	3.77389	2.3405
WT HFD vs WT NCD	K14088	echC; ech hydrogenase subunit C	0.00323167	0.0207238	Inf	NA
WT HFD vs WT NCD	K14155	patB, malY; cystathione beta-lyase [EC:4.4.1.8]	0.00534099	0.0207238	4.05309	2.4189
WT HFD vs WT NCD	K14170	pheA; chorismate mutase / prephenate dehydratase [EC:5.4.99.5 4.2.1.51]	0.00534099	0.0207238	6.07256	5.49256
WT HFD vs WT NCD	K14188	dltC; D-alanine--poly(phosphoribitol) ligase subunit 2 [EC:6.1.1.13]	0.00534099	0.0207238	5.6923	3.74598
WT HFD vs WT NCD	K14189	dltE; uncharacterized oxidoreductase [EC:1.-.-.-]	0.00336134	0.0207238	Inf	NA
WT HFD vs WT NCD	K14218	tRNA-Ala; tRNA Ala	0.00534099	0.0207238	3.99143	2.33969
WT HFD vs WT NCD	K14219	tRNA-Arg; tRNA Arg	0.00534099	0.0207238	4.72888	2.87233
WT HFD vs WT NCD	K14220	tRNA-Asn; tRNA Asn	0.00534099	0.0207238	5.18203	3.24195
WT HFD vs WT NCD	K14221	tRNA-Asp; tRNA Asp	0.00534099	0.0207238	4.75612	2.911
WT HFD vs WT NCD	K14222	tRNA-Cys; tRNA Cys	0.00534099	0.0207238	4.95213	3.00903
WT HFD vs WT NCD	K14223	tRNA-Gln; tRNA Gln	0.00534099	0.0207238	5.20361	3.29588
WT HFD vs WT NCD	K14224	tRNA-Glu; tRNA Glu	0.00534099	0.0207238	5.20302	3.28414
WT HFD vs WT NCD	K14225	tRNA-Gly; tRNA Gly	0.00534099	0.0207238	4.69051	2.86192
WT HFD vs WT NCD	K14226	tRNA-His; tRNA His	0.00534099	0.0207238	4.78082	2.95533
WT HFD vs WT NCD	K14227	tRNA-Ile; tRNA Ile	0.00534099	0.0207238	4.43474	2.74478
WT HFD vs WT NCD	K14228	tRNA-Leu; tRNA Leu	0.00534099	0.0207238	4.92022	3.00398
WT HFD vs WT NCD	K14229	tRNA-Lys; tRNA Lys	0.00534099	0.0207238	4.90289	2.98519
WT HFD vs WT NCD	K14230	tRNA-Met; tRNA Met	0.00534099	0.0207238	5.07837	3.14693
WT HFD vs WT NCD	K14231	tRNA-Phe; tRNA Phe	0.00534099	0.0207238	4.94496	3.05668
WT HFD vs WT NCD	K14232	tRNA-Pro; tRNA Pro	0.00534099	0.0207238	4.56603	2.78349
WT HFD vs WT NCD	K14233	tRNA-Ser; tRNA Ser	0.00534099	0.0207238	4.88206	3.0074
WT HFD vs WT NCD	K14234	tRNA-Thr; tRNA Thr	0.00534099	0.0207238	4.97501	3.09115
WT HFD vs WT NCD	K14235	tRNA-Trp; tRNA Trp	0.00534099	0.0207238	4.72905	2.90877
WT HFD vs WT NCD	K14236	tRNA-Tyr; tRNA Tyr	0.00534099	0.0207238	4.94395	3.0719
WT HFD vs WT NCD	K14237	tRNA-Val; tRNA Val	0.00534099	0.0207238	4.78122	2.91032
WT HFD vs WT NCD	K14260	alaA; alanine-synthesizing transaminase [EC:2.6.1.66 2.6.1.2]	0.00534099	0.0207238	6.90464	3.72776
WT HFD vs WT NCD	K14392	panF; sodium/pantothenate symporter	0.00534099	0.0207238	Inf	NA
WT HFD vs WT NCD	K14540	rbgA; ribosome biogenesis GTPase A	0.00534099	0.0207238	5.73605	3.7139
WT HFD vs WT NCD	K14623	dinD; DNA-damage-inducible protein D	0.00340524	0.0207238	-6.64036	1.57917
WT HFD vs WT NCD	K14652	ribBA; 3,4-dihydroxy 2-butanone 4-phosphate synthase / GTP cyclohydrolase II [EC:4.1.99.12 3.5.4.25]	0.00534099	0.0207238	3.14126	1.93726
WT HFD vs WT NCD	K14982	ciaH; two-component system, OmpR family, sensor histidine kinase CiaH [EC:2.7.13.3]	0.00336134	0.0207238	10.0122	1.33909
WT HFD vs WT NCD	K15035	ssrA, sipB; transfer-messenger RNA	0.00534099	0.0207238	5.60157	3.62459
WT HFD vs WT NCD	K15051	K15051, endA; DNA-entry nuclease	0.00534099	0.0207238	5.88772	3.96077
WT HFD vs WT NCD	K15531	rexA; oligosaccharide reducing-end xylanase [EC:3.2.1.156]	0.00336134	0.0207238	Inf	NA
WT HFD vs WT NCD	K15580	oppA, mppA; oligopeptide transport system substrate-binding protein	0.00340524	0.0207238	7.2784	3.30288
WT HFD vs WT NCD	K15581	oppB; oligopeptide transport system permease protein	0.00534099	0.0207238	5.94422	3.15551
WT HFD vs WT NCD	K15582	oppC; oligopeptide transport system permease protein	0.00340524	0.0207238	6.95767	3.15459
WT HFD vs WT NCD	K15583	oppD; oligopeptide transport system ATP-binding protein	0.00340524	0.0207238	8.17565	1.98789
WT HFD vs WT NCD	K15634	gpmB; probable phosphoglycerate mutase [EC:5.4.2.12]	0.00534099	0.0207238	5.29382	3.37279
WT HFD vs WT NCD	K15669	hddC; D-glycero-alpha-D-manno-heptose 1-phosphate guanylyltransferase [EC:2.7.7.71]	0.00497016	0.0207238	#VALUE!	NA
WT HFD vs WT NCD	K15738	uup; ATP-binding cassette, subfamily F, uup	0.00340524	0.0207238	3.58523	1.74541
WT HFD vs WT NCD	K15770	cycB, ganO; arabinogalactan oligomer / maltooligosaccharide transport system substrate-binding protein	0.00534099	0.0207238	6.09905	3.90212
WT HFD vs WT NCD	K15771	ganP; arabinogalactan oligomer / maltooligosaccharide transport system permease protein	0.00534099	0.0207238	6.00042	3.94619
WT HFD vs WT NCD	K15772	ganQ; arabinogalactan oligomer / maltooligosaccharide transport system permease protein	0.00534099	0.0207238	6.06914	3.94768
WT HFD vs WT NCD	K15773	hipB; HTH-type transcriptional regulator / antitoxin HipB	0.00336134	0.0207238	Inf	NA
WT HFD vs WT NCD	K15830	hycE; formate hydrogenlyase subunit 5	0.00336134	0.0207238	Inf	NA
WT HFD vs WT NCD	K15876	nrfH; cytochrome c nitrite reductase small subunit	0.00327456	0.0207238	#VALUE!	NA
WT HFD vs WT NCD	K15986	ppaC; manganese-dependent inorganic pyrophosphatase [EC:3.6.1.1]	0.00534099	0.0207238	5.75469	3.73685
WT HFD vs WT NCD	K16012	cydC; ATP-binding cassette, subfamily C, bacterial CydC	0.00534099	0.0207238	5.69742	3.75272
WT HFD vs WT NCD	K16013	cydD; ATP-binding cassette, subfamily C, bacterial CydD	0.00534099	0.0207238	5.69742	3.75272
WT HFD vs WT NCD	K16137	nemR; TetR/AcrR family transcriptional regulator, transcriptional repressor for nem operon	0.00340524	0.0207238	9.07545	1.6249
WT HFD vs WT NCD	K16169	pbuX; xanthine permease	0.00534099	0.0207238	5.69866	3.75317
WT HFD vs WT NCD	K16209	lacS, galP, rafP; lactose/raffinose/galactose permease	0.00534099	0.0207238	5.73215	3.89971
WT HFD vs WT NCD	K16210	togT, rhiT; oligogalacturonide transporter	0.00340524	0.0207238	Inf	NA
WT HFD vs WT NCD	K16211	malY, malT; maltose/moltooligosaccharide transporter	0.00534099	0.0207238	4.42334	2.77455
WT HFD vs WT NCD	K16214	pezT; UDP-N-acetylglucosamine kinase [EC:2.7.1.176]	0.00336134	0.0207238	Inf	NA
WT HFD vs WT NCD	K16264	czcD, zitB; cobalt-zinc-cadmium efflux system protein	0.00534099	0.0207238	4.85353	3.04843
WT HFD vs WT NCD	K16435	evaA; oxidase EvaA	0.00497016	0.0207238	#VALUE!	NA
WT HFD vs WT NCD	K16509	spxA; regulatory protein spx	0.00534099	0.0207238	5.81507	3.73553
WT HFD vs WT NCD	K16511	mecA1_2; adapter protein MecA 1/2	0.00534099	0.0207238	5.83098	3.74646
WT HFD vs WT NCD	K16785	ecfT; energy-coupling factor transport system permease protein	0.00534099	0.0207238	5.71189	3.75693
WT HFD vs WT NCD	K16786	ecfA1; energy-coupling factor transport system ATP-binding protein [EC:3.6.3.-]	0.00534099	0.0207238	5.70164	3.74468
WT HFD vs WT NCD	K16787	ecfA2; energy-coupling factor transport system ATP-binding protein [EC:3.6.3.-]	0.00534099	0.0207238	5.69362	3.73427
WT HFD vs WT NCD	K16788	niaX; niacin transporter	0.00340524	0.0207238	9.77853	1.52662
WT HFD vs WT NCD	K16789	thiT; thiamine transporter	0.00340524	0.0207238	9.00648	2.05706
WT HFD vs WT NCD	K16898	addA; ATP-dependent helicase/nuclease subunit A [EC:3.1.-.- 3.6.4.12]	0.00534099	0.0207238	5.73644	3.71403
WT HFD vs WT NCD	K16899	addB; ATP-dependent helicase/nuclease subunit B [EC:3.1.-.- 3.6.4.12]	0.00534099	0.0207238	5.73644	3.71403
WT HFD vs WT NCD	K16923	qrtT; energy-coupling factor transport system substrate-specific component	0.00527816	0.0207238	Inf	NA
WT HFD vs WT NCD	K16924	mtsT; energy-coupling factor transport system substrate-specific component	0.00534099	0.0207238	5.99848	4.00133
WT HFD vs WT NCD	K16925	ykoE; energy-coupling factor transport system substrate-specific component	0.00534099	0.0207238	5.59754	3.76553
WT HFD vs WT NCD	K17073	lysX1; putative lysine transport system substrate-binding protein	0.00534099	0.0207238	5.9221	4.00981
WT HFD vs WT NCD	K17074	lysX2; putative lysine transport system permease protein	0.00534099	0.0207238	5.9221	4.00981
WT HFD vs WT NCD	K17076	K17076, lysY; putative lysine transport system ATP-binding protein [EC:3.6.3.-]	0.00534099	0.0207238	5.9221	4.00981
WT HFD vs WT NCD	K17318	K17318, lplA; putative aldouronate transport system substrate-binding protein	0.00340524	0.0207238	Inf	NA
WT HFD vs WT NCD	K17319	lplB; putative aldouronate transport system permease protein	0.00340524	0.0207238	Inf	NA
WT HFD vs WT NCD	K17320	lplC; putative aldouronate transport system permease protein	0.00340524	0.0207238	Inf	NA
WT HFD vs WT NCD	K17677	IRC3; ATP-dependent helicase IRC3 [EC:3.6.4.-]	0.00534099	0.0207238	3.69975	2.20819
WT HFD vs WT NCD	K17686	copA, ATP7; Cu+-exporting ATPase [EC:3.6.3.54]	0.00534099	0.0207238	5.71132	3.71178
WT HFD vs WT NCD	K17810	asl; D-aspartate ligase [EC:6.3.1.12]	0.00534099	0.0207238	5.83116	3.91979
WT HFD vs WT NCD	K17828	pyrDI; dihydroorotate dehydrogenase (NAD+) catalytic subunit [EC:1.3.1.14]	0.00340524	0.0207238	2.92026	1.13668
WT HFD vs WT NCD	K17836	penP; beta-lactamase class A [EC:3.5.2.6]	0.00534099	0.0207238	5.02202	3.17894
WT HFD vs WT NCD	K17992	hndB; NADP-reducing hydrogenase subunit HndB [EC:1.12.1.3]	0.00145409	0.0207238	#VALUE!	NA
WT HFD vs WT NCD	K18104	abcA, bmrA; ATP-binding cassette, subfamily B, bacterial AbcA/BmrA [EC:3.6.3.44]	0.00534099	0.0207238	5.73106	3.81989
WT HFD vs WT NCD	K18330	hndA; NADP-reducing hydrogenase subunit HndA [EC:1.12.1.3]	0.00145409	0.0207238	#VALUE!	NA
WT HFD vs WT NCD	K18331	hndC; NADP-reducing hydrogenase subunit HndC [EC:1.12.1.3]	0.00145409	0.0207238	#VALUE!	NA
WT HFD vs WT NCD	K18332	hndD; NADP-reducing hydrogenase subunit HndD [EC:1.12.1.3]	0.00145409	0.0207238	#VALUE!	NA
WT HFD vs WT NCD	K18349	vanRC, vanRE, vanRG; two-component system, OmpR family, response regulator VanR	0.00340524	0.0207238	Inf	NA
WT HFD vs WT NCD	K18672	dacA; diadenylate cyclase [EC:2.7.7.85]	0.00534099	0.0207238	5.69024	3.74594
WT HFD vs WT NCD	K18682	rny; ribonucrease Y [EC:3.1.-.-]	0.00534099	0.0207238	4.52842	2.79142
WT HFD vs WT NCD	K18692	cshB; ATP-dependent RNA helicase CshB [EC:3.6.4.13]	0.00534099	0.0207238	5.69224	3.74585
WT HFD vs WT NCD	K18702	uctC; CoA:oxalate CoA-transferase [EC:2.8.3.19]	0.00534099	0.0207238	5.93188	4.02356
WT HFD vs WT NCD	K18704	tarL; CDP-ribitol ribitolphosphotransferase [EC:2.7.8.14]	0.00336134	0.0207238	7.53117	2.12748
WT HFD vs WT NCD	K18830	pezA; HTH-type transcriptional regulator / antitoxin PezA	0.00336134	0.0207238	Inf	NA
WT HFD vs WT NCD	K06897	K06897; 7,8-dihydropterin-6-yl-methyl-4-(beta-D-ribofuranosyl)aminobenzene 5'-phosphate synthase [EC:2.5.1.105]	0.00641963	0.0248562	#VALUE!	NA
WT HFD vs WT NCD	K16698	tuaG; teichuronic acid biosynthesis glycosyltransferase TuaG [EC:2.4.-.-]	0.00641963	0.0248562	#VALUE!	NA
WT HFD vs WT NCD	K00968	PCYT1; choline-phosphate cytidylyltransferase [EC:2.7.7.15]	0.00647784	0.0250639	#VALUE!	NA
WT HFD vs WT NCD	K16927	cbrT; energy-coupling factor transport system substrate-specific component	0.00649326	0.025088	Inf	NA
WT HFD vs WT NCD	K18350	vanSC, vanSE, vanSG; two-component system, OmpR family, sensor histidine kinase VanS [EC:2.7.13.3]	0.00649326	0.025088	Inf	NA
WT HFD vs WT NCD	K08679	E5.1.3.6; UDP-glucuronate 4-epimerase [EC:5.1.3.6]	0.00656735	0.0253206	#VALUE!	NA
WT HFD vs WT NCD	K12992	rfbN; rhamnosyltransferase [EC:2.4.1.-]	0.00656735	0.0253206	Inf	NA
WT HFD vs WT NCD	K17103	CHO1, pssA; CDP-diacylglycerol---serine O-phosphatidyltransferase [EC:2.7.8.8]	0.00656735	0.0253206	-5.15159	2.70811
WT HFD vs WT NCD	K00123	fdoG, fdfH; formate dehydrogenase major subunit [EC:1.2.1.2]	0.00822097	0.0296096	3.24153	2.49115
WT HFD vs WT NCD	K00131	gapN; glyceraldehyde-3-phosphate dehydrogenase (NADP+) [EC:1.2.1.9]	0.00822097	0.0296096	Inf	NA
WT HFD vs WT NCD	K00171	porD; pyruvate ferredoxin oxidoreductase delta subunit [EC:1.2.7.1]	0.00822097	0.0296096	Inf	NA
WT HFD vs WT NCD	K00265	gltB; glutamate synthase (NADPH/NADH) large chain [EC:1.4.1.13 1.4.1.14]	0.00822097	0.0296096	2.63396	1.36957
WT HFD vs WT NCD	K00558	DNMT1, dcm; DNA (cytosine-5)-methyltransferase 1 [EC:2.1.1.37]	0.00822097	0.0296096	3.41371	1.64264
WT HFD vs WT NCD	K00575	cheR; chemotaxis protein methyltransferase CheR [EC:2.1.1.80]	0.00822097	0.0296096	6.95851	4.13789
WT HFD vs WT NCD	K00603	fctD; glutamate formiminotransferase [EC:2.1.2.5]	0.00813307	0.0296096	-6.53357	2.57405
WT HFD vs WT NCD	K00616	E2.2.1.2, talA, talB; transaldolase [EC:2.2.1.2]	0.00822097	0.0296096	1.99535	1.11028
WT HFD vs WT NCD	K00638	catB; chloramphenicol O-acetyltransferase type B [EC:2.3.1.28]	0.00822097	0.0296096	-5.47088	2.50052
WT HFD vs WT NCD	K00648	fabH; 3-oxoacyl-[acyl-carrier-protein] synthase III [EC:2.3.1.180]	0.00822097	0.0296096	2.69576	1.70373
WT HFD vs WT NCD	K00656	E2.3.1.54, pflD; formate C-acetyltransferase [EC:2.3.1.54]	0.00822097	0.0296096	2.22324	1.23762
WT HFD vs WT NCD	K00764	purF, PPAT; amidophosphoribosyltransferase [EC:2.4.2.14]	0.00822097	0.0296096	2.22834	1.29336
WT HFD vs WT NCD	K00848	rhaB; rhamnulokinase [EC:2.7.1.5]	0.00822097	0.0296096	2.58562	1.36706
WT HFD vs WT NCD	K00978	rfbF; glucose-1-phosphate cytidylyltransferase [EC:2.7.7.33]	0.00822097	0.0296096	-6.67062	2.65977
WT HFD vs WT NCD	K00991	ispD; 2-C-methyl-D-erythritol 4-phosphate cytidylyltransferase [EC:2.7.7.60]	0.00822097	0.0296096	1.93157	1.02925
WT HFD vs WT NCD	K01041	E2.8.3.-	0.00778632	0.0296096	#VALUE!	NA
WT HFD vs WT NCD	K01091	gph; phosphoglycolate phosphatase [EC:3.1.3.18]	0.00822097	0.0296096	2.5403	1.37163
WT HFD vs WT NCD	K01144	E3.1.11.5; exodeoxyribonuclease V [EC:3.1.11.5]	0.00822097	0.0296096	-4.73825	1.95367
WT HFD vs WT NCD	K01151	nfo; deoxyribonuclease IV [EC:3.1.21.2]	0.00822097	0.0296096	2.3667	1.29359
WT HFD vs WT NCD	K01173	ENDOG; endonuclease G, mitochondrial	0.00822097	0.0296096	-6.34879	2.56443
WT HFD vs WT NCD	K01186	NEU1; sialidase-1 [EC:3.2.1.18]	0.00813307	0.0296096	-6.92892	2.87946
WT HFD vs WT NCD	K01205	NAGLU; alpha-N-acetylglucosaminidase [EC:3.2.1.50]	0.00813307	0.0296096	-6.98003	2.84062
WT HFD vs WT NCD	K01267	DNPEP; aspartyl aminopeptidase [EC:3.4.11.21]	0.00822097	0.0296096	Inf	NA
WT HFD vs WT NCD	K01277	DPP3; dipeptidyl-peptidase III [EC:3.4.14.4]	0.00813307	0.0296096	-6.67584	2.6015
WT HFD vs WT NCD	K01470	E3.5.2.10; creatinine amidohydrolase [EC:3.5.2.10]	0.00822097	0.0296096	2.57361	1.31372
WT HFD vs WT NCD	K01507	ppa; inorganic pyrophosphatase [EC:3.6.1.1]	0.00822097	0.0296096	5.85869	3.70083
WT HFD vs WT NCD	K01620	ltaE; threonine aldolase [EC:4.1.2.5]	0.00822097	0.0296096	2.07532	1.0953
WT HFD vs WT NCD	K01787	RENBP; N-acylglucosamine 2-epimerase [EC:5.1.3.8]	0.00813307	0.0296096	-6.7038	2.64199
WT HFD vs WT NCD	K01885	EARS, gltX; glutamyl-tRNA synthetase [EC:6.1.1.17]	0.00822097	0.0296096	1.9955	1.114
WT HFD vs WT NCD	K01999	livK; branched-chain amino acid transport system substrate-binding protein	0.00822097	0.0296096	5.20307	5.00529
WT HFD vs WT NCD	K02016	ABC.FEV.S; iron complex transport system substrate-binding protein	0.00822097	0.0296096	2.45515	1.52661
WT HFD vs WT NCD	K02019	modE; molybdate transport system regulatory protein	0.00822097	0.0296096	4.28846	2.52759
WT HFD vs WT NCD	K02049	ABC.SN.A; NitT/TauT family transport system ATP-binding protein	0.00822097	0.0296096	6.07083	3.36603
WT HFD vs WT NCD	K02050	ABC.SN.P; NitT/TauT family transport system permease protein	0.00822097	0.0296096	6.7749	3.62195
WT HFD vs WT NCD	K02058	ABC.SS.S; simple sugar transport system substrate-binding protein	0.00822097	0.0296096	7.54857	4.60001
WT HFD vs WT NCD	K02278	cpaA, tadV; prepilin peptidase CpaA [EC:3.4.23.43]	0.00822097	0.0296096	Inf	NA
WT HFD vs WT NCD	K02398	flgM; negative regulator of flagellin synthesis FlgM	0.00822097	0.0296096	8.12852	4.11253
WT HFD vs WT NCD	K02400	flhA; flagellar biosynthesis protein FlhA	0.00822097	0.0296096	7.21706	4.33682
WT HFD vs WT NCD	K02412	fliI; flagellum-specific ATP synthase [EC:3.6.3.14]	0.00822097	0.0296096	7.14821	4.37224
WT HFD vs WT NCD	K02420	fliQ; flagellar biosynthetic protein FliQ	0.00822097	0.0296096	7.27989	4.45612
WT HFD vs WT NCD	K02422	fliS; flagellar protein FliS	0.00822097	0.0296096	7.0036	4.29892
WT HFD vs WT NCD	K02438	treX, glgX; glycogen operon protein [EC:3.2.1.-]	0.00822097	0.0296096	5.7582	5.82272
WT HFD vs WT NCD	K02474	wbpO; UDP-N-acetyl-D-galactosamine dehydrogenase [EC:1.1.1.-]	0.00813307	0.0296096	#VALUE!	NA
WT HFD vs WT NCD	K02803	PTS-Nag-EIIB, nagE; PTS system, N-acetylglucosamine-specific IIB component [EC:2.7.1.69]	0.00822097	0.0296096	6.34551	3.86415
WT HFD vs WT NCD	K02804	PTS-Nag-EIIC, nagE; PTS system, N-acetylglucosamine-specific IIC component	0.00822097	0.0296096	6.34551	3.86415
WT HFD vs WT NCD	K03092	SIG54, rpoN; RNA polymerase sigma-54 factor	0.00822097	0.0296096	-3.97344	2.19674
WT HFD vs WT NCD	K03147	thiC; phosphomethylpyrimidine synthase [EC:4.1.99.17]	0.00822097	0.0296096	2.51525	1.28474
WT HFD vs WT NCD	K03407	cheA; two-component system, chemotaxis family, sensor kinase CheA [EC:2.7.13.3]	0.00822097	0.0296096	6.681	3.87396
WT HFD vs WT NCD	K03412	cheB; two-component system, chemotaxis family, response regulator CheB [EC:3.1.1.61]	0.00822097	0.0296096	7.44185	4.62382
WT HFD vs WT NCD	K03413	cheY; two-component system, chemotaxis family, response regulator CheY	0.00822097	0.0296096	7.16913	4.03715
WT HFD vs WT NCD	K03522	fixB, etfA; electron transfer flavoprotein alpha subunit	0.00822097	0.0296096	2.50702	1.43455
WT HFD vs WT NCD	K03606	wcaJ; putative colanic acid biosysnthesis UDP-glucose lipid carrier transferase	0.00822097	0.0296096	-6.91474	2.77915
WT HFD vs WT NCD	K03608	minE; cell division topological specificity factor	0.00822097	0.0296096	Inf	NA
WT HFD vs WT NCD	K03609	minD; septum site-determining protein MinD	0.00822097	0.0296096	7.46768	4.41032
WT HFD vs WT NCD	K03610	minC; septum site-determining protein MinC	0.00822097	0.0296096	Inf	NA
WT HFD vs WT NCD	K03614	rnfD; electron transport complex protein RnfD	0.00822097	0.0296096	-5.41346	2.47818
WT HFD vs WT NCD	K03628	rho; transcription termination factor Rho	0.00822097	0.0296096	2.00588	1.11514
WT HFD vs WT NCD	K03781	katE, CAT, catB, srpA; catalase [EC:1.11.1.6]	0.00822097	0.0296096	-3.86535	1.74788
WT HFD vs WT NCD	K04069	pflA, pflC, pflE; pyruvate formate lyase activating enzyme [EC:1.97.1.4]	0.00822097	0.0296096	2.23328	1.2574
WT HFD vs WT NCD	K05367	pbpC; penicillin-binding protein 1C [EC:2.4.1.-]	0.00822097	0.0296096	-6.47246	2.27565
WT HFD vs WT NCD	K05995	pepE; dipeptidase E [EC:3.4.13.21]	0.00822097	0.0296096	2.92367	1.9111
WT HFD vs WT NCD	K06133	LYS5, acpT; 4'-phosphopantetheinyl transferase [EC:2.7.8.-]	0.00822097	0.0296096	7.95641	3.96022
WT HFD vs WT NCD	K06168	miaB; tRNA-2-methylthio-N6-dimethylallyladenosine synthase [EC:2.8.4.3]	0.00822097	0.0296096	1.98526	1.10513
WT HFD vs WT NCD	K06334	cotJC; spore coat protein JC	0.00813307	0.0296096	Inf	NA
WT HFD vs WT NCD	K06999	K06999; phospholipase/carboxylesterase	0.00822097	0.0296096	5.50699	3.53102
WT HFD vs WT NCD	K07031	hddA; D-glycero-alpha-D-manno-heptose-7-phosphate kinase [EC:2.7.1.168]	0.00778632	0.0296096	#VALUE!	NA
WT HFD vs WT NCD	K07078	K07078	0.00822097	0.0296096	3.26401	1.78878
WT HFD vs WT NCD	K07080	K07080	0.00822097	0.0296096	7.37269	3.77147
WT HFD vs WT NCD	K07114	yfbK; Ca-activated chloride channel homolog	0.00822097	0.0296096	-4.04332	2.054
WT HFD vs WT NCD	K07175	phoH2; PhoH-like ATPase	0.00813307	0.0296096	#VALUE!	NA
WT HFD vs WT NCD	K07257	spsF; spore coat polysaccharide biosynthesis protein SpsF	0.00778632	0.0296096	#VALUE!	NA
WT HFD vs WT NCD	K07504	K07504; hypothetical protein	0.00822097	0.0296096	#VALUE!	NA
WT HFD vs WT NCD	K07699	spo0A; two-component system, response regulator, stage 0 sporulation protein A	0.00813307	0.0296096	Inf	NA
WT HFD vs WT NCD	K07813	agrB; accessory gene regulator B	0.00822097	0.0296096	7.57248	4.48048
WT HFD vs WT NCD	K07862	sstT; serine/threonine transporter	0.00822097	0.0296096	Inf	NA
WT HFD vs WT NCD	K08138	xylE; MFS transporter, SP family, xylose:H+ symportor	0.00813307	0.0296096	-6.57038	2.57601
WT HFD vs WT NCD	K08325	yqhD; NADP-dependent alcohol dehydrogenase [EC:1.1.-.-]	0.00822097	0.0296096	-6.33817	2.38349
WT HFD vs WT NCD	K08676	tri; tricorn protease [EC:3.4.21.-]	0.00813307	0.0296096	-6.53357	2.57405
WT HFD vs WT NCD	K08986	ycgQ; putative membrane protein	0.00822097	0.0296096	2.55002	1.74728
WT HFD vs WT NCD	K09768	K09768; hypothetical protein	0.00822097	0.0296096	7.15976	4.3972
WT HFD vs WT NCD	K09815	znuA; zinc transport system substrate-binding protein	0.00822097	0.0296096	2.40883	1.40097
WT HFD vs WT NCD	K09922	K09922; hypothetical protein	0.00822097	0.0296096	#VALUE!	NA
WT HFD vs WT NCD	K10119	msmG; raffinose/stachyose/melibiose transport system permease protein	0.00822097	0.0296096	6.54727	6.46941
WT HFD vs WT NCD	K10206	E2.6.1.83; LL-diaminopimelate aminotransferase [EC:2.6.1.83]	0.00822097	0.0296096	2.75961	1.64516
WT HFD vs WT NCD	K11031	slo; thiol-activated cytolysin	0.00804566	0.0296096	#VALUE!	NA
WT HFD vs WT NCD	K11690	dctM; C4-dicarboxylate transporter, DctM subunit	0.00822097	0.0296096	Inf	NA
WT HFD vs WT NCD	K12257	secDF; SecD/SecF fusion protein	0.00822097	0.0296096	2.66066	1.62858
WT HFD vs WT NCD	K13043	argF; N-succinyl-L-ornithine transcarbamylase [EC:2.1.3.11]	0.00813307	0.0296096	-6.67584	2.6015
WT HFD vs WT NCD	K14761	ybcJ; ribosome-associated protein	0.00822097	0.0296096	7.48561	3.66727
WT HFD vs WT NCD	K15635	apgM; 2,3-bisphosphoglycerate-independent phosphoglycerate mutase [EC:5.4.2.12]	0.00822097	0.0296096	-5.44503	2.9611
WT HFD vs WT NCD	K15725	czcC; outer membrane protein, cobalt-zinc-cadmium efflux system	0.00804566	0.0296096	#VALUE!	NA
WT HFD vs WT NCD	K15727	czcB; membrane fusion protein, cobalt-zinc-cadmium efflux system	0.00804566	0.0296096	#VALUE!	NA
WT HFD vs WT NCD	K16053	mscM; miniconductance mechanosensitive channel	0.00822097	0.0296096	-6.78805	2.66005
WT HFD vs WT NCD	K16055	TPS; trehalose 6-phosphate synthase/phosphatase [EC:2.4.1.15 3.1.3.12]	0.00813307	0.0296096	-6.05113	2.335
WT HFD vs WT NCD	K16363	lpxC-fabZ; UDP-3-O-[3-hydroxymyristoyl] N-acetylglucosamine deacetylase / 3-hydroxyacyl-[acyl-carrier-protein] dehydratase [EC:3.5.1.108 4.2.1.59]	0.00813307	0.0296096	-6.60728	2.60689
WT HFD vs WT NCD	K16936	doxA; thiosulfate dehydrogenase [quinone] small subunit [EC:1.8.5.2]	0.00778632	0.0296096	#VALUE!	NA
WT HFD vs WT NCD	K17218	sqr; sulfide:quinone oxidoreductase [EC:1.8.5.-]	0.00804566	0.0296096	#VALUE!	NA
WT HFD vs WT NCD	K17723	preA; dihydropyrimidine dehydrogenase (NAD+) subunit PreA [EC:1.3.1.1]	0.00822097	0.0296096	-3.21134	2.00181
WT HFD vs WT NCD	K18369	adh2; alcohol dehydrogenase [EC:1.1.1.-]	0.00778632	0.0296096	#VALUE!	NA
WT HFD vs WT NCD	K18707	mtaB; threonylcarbamoyladenosine tRNA methylthiotransferase MtaB [EC:2.8.4.5]	0.00822097	0.0296096	2.51872	1.3281
WT HFD vs WT NCD	K02475	K02475; two-component system, CitB family, response regulator	0.00902288	0.0324551	Inf	NA
WT HFD vs WT NCD	K02476	K02476; two-component system, CitB family, sensor kinase [EC:2.7.13.3]	0.00902288	0.0324551	Inf	NA
WT HFD vs WT NCD	K09703	K09703; hypothetical protein	0.00982037	0.0353004	Inf	NA
WT HFD vs WT NCD	K06404	spoVAB; stage V sporulation protein AB	0.00992239	0.035597	Inf	NA
WT HFD vs WT NCD	K07502	K07502; hypothetical protein	0.00992239	0.035597	Inf	NA
WT HFD vs WT NCD	K11184	chr, crh; catabolite repression HPr-like protein	0.00992239	0.035597	Inf	NA
WT HFD vs WT NCD	K00428	E1.11.1.5; cytochrome c peroxidase [EC:1.11.1.5]	0.0100249	0.0358943	-5.46448	2.16029
WT HFD vs WT NCD	K06182	rluF; 23S rRNA pseudouridine2604 synthase [EC:5.4.99.21]	0.0100249	0.0358943	Inf	NA
WT HFD vs WT NCD	K16937	doxD; thiosulfate dehydrogenase [quinone] large subunit [EC:1.8.5.2]	0.0100249	0.0358943	#VALUE!	NA
WT HFD vs WT NCD	K07403	nfeD; membrane-bound serine protease (ClpP class)	0.011128	0.0397398	#VALUE!	NA
WT HFD vs WT NCD	K00010	iolG; myo-inositol 2-dehydrogenase / D-chiro-inositol 1-dehydrogenase [EC:1.1.1.18 1.1.1.369]	0.0124193	0.0403615	-3.00449	2.70971
WT HFD vs WT NCD	K00029	E1.1.1.40, maeB; malate dehydrogenase (oxaloacetate-decarboxylating)(NADP+) [EC:1.1.1.40]	0.0124193	0.0403615	-5.93791	2.21981
WT HFD vs WT NCD	K00346	nqrA; Na+-transporting NADH:ubiquinone oxidoreductase subunit A [EC:1.6.5.-]	0.0124193	0.0403615	-6.34348	2.86761
WT HFD vs WT NCD	K00347	nqrB; Na+-transporting NADH:ubiquinone oxidoreductase subunit B [EC:1.6.5.-]	0.0124193	0.0403615	-6.34348	2.86761
WT HFD vs WT NCD	K00348	nqrC; Na+-transporting NADH:ubiquinone oxidoreductase subunit C [EC:1.6.5.-]	0.0124193	0.0403615	-6.34348	2.86761
WT HFD vs WT NCD	K00349	nqrD; Na+-transporting NADH:ubiquinone oxidoreductase subunit D [EC:1.6.5.-]	0.0124193	0.0403615	-6.34348	2.86761
WT HFD vs WT NCD	K00350	nqrE; Na+-transporting NADH:ubiquinone oxidoreductase subunit E [EC:1.6.5.-]	0.0124193	0.0403615	-6.22644	2.84052
WT HFD vs WT NCD	K00351	nqrF; Na+-transporting NADH:ubiquinone oxidoreductase subunit F [EC:1.6.5.-]	0.0124193	0.0403615	-6.22644	2.84052
WT HFD vs WT NCD	K00573	E2.1.1.77, pcm; protein-L-isoaspartate(D-aspartate) O-methyltransferase [EC:2.1.1.77]	0.0124193	0.0403615	-5.26793	2.54081
WT HFD vs WT NCD	K00633	lacA; galactoside O-acetyltransferase [EC:2.3.1.18]	0.0122992	0.0403615	-6.81341	2.47313
WT HFD vs WT NCD	K00895	E2.7.1.90, pfk; pyrophosphate--fructose-6-phosphate 1-phosphotransferase [EC:2.7.1.90]	0.0124193	0.0403615	-6.49006	2.57334
WT HFD vs WT NCD	K01012	bioB; biotin synthase [EC:2.8.1.6]	0.0124193	0.0403615	2.77263	1.71347
WT HFD vs WT NCD	K01197	hya; hyaluronoglucosaminidase [EC:3.2.1.35]	0.0124193	0.0403615	-6.40945	2.58249
WT HFD vs WT NCD	K01284	dcp; peptidyl-dipeptidase Dcp [EC:3.4.15.5]	0.0124193	0.0403615	-6.28048	2.38919
WT HFD vs WT NCD	K01843	kamA; lysine 2,3-aminomutase [EC:5.4.3.2]	0.0124193	0.0403615	-6.29927	2.48105
WT HFD vs WT NCD	K01847	MUT; methylmalonyl-CoA mutase [EC:5.4.99.2]	0.0124193	0.0403615	-6.32779	2.53568
WT HFD vs WT NCD	K01950	E6.3.5.1, NADSYN1, QNS1, nadE; NAD+ synthase (glutamine-hydrolysing) [EC:6.3.5.1]	0.0124193	0.0403615	-3.42098	2.0744
WT HFD vs WT NCD	K01966	PCCB, pccB; propionyl-CoA carboxylase beta chain [EC:6.4.1.3]	0.0124193	0.0403615	#VALUE!	NA
WT HFD vs WT NCD	K01991	ABC-2.OM, wza; polysaccharide export outer membrane protein	0.0124193	0.0403615	-6.09761	2.48185
WT HFD vs WT NCD	K01993	ABC-2.TX; HlyD family secretion protein	0.0124193	0.0403615	-6.31958	2.41393
WT HFD vs WT NCD	K02022	ABC.MR.TX; HlyD family secretion protein	0.0122992	0.0403615	#VALUE!	NA
WT HFD vs WT NCD	K02230	cobN; cobaltochelatase CobN [EC:6.6.1.2]	0.0124193	0.0403615	#VALUE!	NA
WT HFD vs WT NCD	K02387	flgB; flagellar basal-body rod protein FlgB	0.0124193	0.0403615	6.87503	4.22779
WT HFD vs WT NCD	K02388	flgC; flagellar basal-body rod protein FlgC	0.0124193	0.0403615	6.87501	4.22778
WT HFD vs WT NCD	K02389	flgD; flagellar basal-body rod modification protein FlgD	0.0124193	0.0403615	6.87501	4.22778
WT HFD vs WT NCD	K02390	flgE; flagellar hook protein FlgE	0.0124193	0.0403615	6.71658	4.17661
WT HFD vs WT NCD	K02395	flgJ; flagellar protein FlgJ	0.0122992	0.0403615	-2.70871	1.49177
WT HFD vs WT NCD	K02397	flgL; flagellar hook-associated protein 3 FlgL	0.0124193	0.0403615	6.90241	4.30315
WT HFD vs WT NCD	K02404	flhF; flagellar biosynthesis protein FlhF	0.0122992	0.0403615	Inf	NA
WT HFD vs WT NCD	K02408	fliE; flagellar hook-basal body complex protein FliE	0.0124193	0.0403615	6.87504	4.2278
WT HFD vs WT NCD	K02409	fliF; flagellar M-ring protein FliF	0.0124193	0.0403615	6.87499	4.22778
WT HFD vs WT NCD	K02410	fliG; flagellar motor switch protein FliG	0.0124193	0.0403615	6.87501	4.22778
WT HFD vs WT NCD	K02414	fliK; flagellar hook-length control protein FliK	0.0124193	0.0403615	8.17676	5.2796
WT HFD vs WT NCD	K02416	fliM; flagellar motor switch protein FliM	0.0124193	0.0403615	6.87501	4.22778
WT HFD vs WT NCD	K02419	fliP; flagellar biosynthetic protein FliP	0.0124193	0.0403615	6.87501	4.22778
WT HFD vs WT NCD	K02443	glpP; glycerol uptake operon antiterminator	0.0124193	0.0403615	6.64196	4.58827
WT HFD vs WT NCD	K02589	nifHD1, nifI1; nitrogen regulatory protein PII 1	0.0119421	0.0403615	Inf	NA
WT HFD vs WT NCD	K02590	nifHD2, nifI2; nitrogen regulatory protein PII 2	0.0119421	0.0403615	Inf	NA
WT HFD vs WT NCD	K03324	yjbB; phosphate:Na+ symporter	0.0124193	0.0403615	3.323	2.04171
WT HFD vs WT NCD	K03327	TC.MATE, SLC47A, norM, mdtK, dinF; multidrug resistance protein, MATE family	0.0124193	0.0403615	-5.81446	2.45227
WT HFD vs WT NCD	K03408	cheW; purine-binding chemotaxis protein CheW	0.0124193	0.0403615	7.24291	4.47298
WT HFD vs WT NCD	K03411	cheD; chemotaxis protein CheD [EC:3.5.1.44]	0.0124193	0.0403615	Inf	NA
WT HFD vs WT NCD	K03430	phnW; 2-aminoethylphosphonate-pyruvate transaminase [EC:2.6.1.37]	0.0124193	0.0403615	-6.43567	2.43005
WT HFD vs WT NCD	K03446	emrB; MFS transporter, DHA2 family, multidrug resistance protein	0.0124193	0.0403615	-5.4136	2.56313
WT HFD vs WT NCD	K03498	trkH; trk system potassium uptake protein TrkH	0.0124193	0.0403615	2.44021	1.36556
WT HFD vs WT NCD	K03543	emrA; membrane fusion protein, multidrug efflux system	0.0124193	0.0403615	-5.06957	2.32806
WT HFD vs WT NCD	K03585	acrA, mexA, adeI, smeD, mtrC, cmeA; membrane fusion protein, multidrug efflux system	0.0124193	0.0403615	-6.40294	2.58938
WT HFD vs WT NCD	K03594	bfr; bacterioferritin [EC:1.16.3.1]	0.0124193	0.0403615	-5.57255	2.54397
WT HFD vs WT NCD	K03773	fklB; FKBP-type peptidyl-prolyl cis-trans isomerase FklB [EC:5.2.1.8]	0.0124193	0.0403615	-6.76791	2.82924
WT HFD vs WT NCD	K03779	ttdA; L(+)-tartrate dehydratase alpha subunit [EC:4.2.1.32]	0.0124193	0.0403615	8.84748	4.78827
WT HFD vs WT NCD	K03780	ttdB; L(+)-tartrate dehydratase beta subunit [EC:4.2.1.32]	0.0124193	0.0403615	8.84748	4.78827
WT HFD vs WT NCD	K03803	rseC; sigma-E factor negative regulatory protein RseC	0.0124193	0.0403615	-5.88474	2.12516
WT HFD vs WT NCD	K03814	mtgA; monofunctional biosynthetic peptidoglycan transglycosylase [EC:2.4.1.-]	0.0124193	0.0403615	-5.71492	2.47424
WT HFD vs WT NCD	K03839	fldA, nifF, isiB; flavodoxin I	0.0124193	0.0403615	-6.62235	2.64812
WT HFD vs WT NCD	K03856	AROA2, aroA; 3-deoxy-7-phosphoheptulonate synthase [EC:2.5.1.54]	0.0122992	0.0403615	Inf	NA
WT HFD vs WT NCD	K03929	pnbA; para-nitrobenzyl esterase [EC:3.1.1.-]	0.0124193	0.0403615	#VALUE!	NA
WT HFD vs WT NCD	K04045	hscC; molecular chaperone HscC	0.0122992	0.0403615	Inf	NA
WT HFD vs WT NCD	K04562	flhG, fleN; flagellar biosynthesis protein FlhG	0.0122992	0.0403615	Inf	NA
WT HFD vs WT NCD	K04653	hypC; hydrogenase expression/formation protein HypC	0.0122992	0.0403615	2.14858	2.02369
WT HFD vs WT NCD	K04654	hypD; hydrogenase expression/formation protein HypD	0.0124193	0.0403615	2.24852	2.05059
WT HFD vs WT NCD	K04655	hypE; hydrogenase expression/formation protein HypE	0.0124193	0.0403615	2.24852	2.05059
WT HFD vs WT NCD	K04656	hypF; hydrogenase maturation protein HypF	0.0124193	0.0403615	2.24852	2.05059
WT HFD vs WT NCD	K05306	phnX; phosphonoacetaldehyde hydrolase [EC:3.11.1.1]	0.0124193	0.0403615	-6.51356	2.57336
WT HFD vs WT NCD	K05776	modF; molybdate transport system ATP-binding protein	0.0124193	0.0403615	-6.05773	2.34459
WT HFD vs WT NCD	K05795	terD; tellurium resistance protein TerD	0.0122992	0.0403615	Inf	NA
WT HFD vs WT NCD	K05801	djlA; DnaJ like chaperone protein	0.0124193	0.0403615	-5.50503	2.03754
WT HFD vs WT NCD	K06179	rluC; 23S rRNA pseudouridine955/2504/2580 synthase [EC:5.4.99.24]	0.0124193	0.0403615	6.70854	4.10089
WT HFD vs WT NCD	K06209	pheB; chorismate mutase [EC:5.4.99.5]	0.0124193	0.0403615	6.42822	4.2119
WT HFD vs WT NCD	K06310	yndD; spore germination protein	0.0122992	0.0403615	Inf	NA
WT HFD vs WT NCD	K06317	bofA; inhibitor of the pro-sigma K processing machinery	0.0119421	0.0403615	Inf	NA
WT HFD vs WT NCD	K06381	spoIID; stage II sporulation protein D	0.0124193	0.0403615	7.0905	4.41223
WT HFD vs WT NCD	K06395	spoIIIAF; stage III sporulation protein AF	0.0119421	0.0403615	Inf	NA
WT HFD vs WT NCD	K06396	spoIIIAG; stage III sporulation protein AG	0.0122992	0.0403615	Inf	NA
WT HFD vs WT NCD	K06405	spoVAC; stage V sporulation protein AC	0.0119421	0.0403615	Inf	NA
WT HFD vs WT NCD	K06409	spoVB; stage V sporulation protein B	0.0122992	0.0403615	Inf	NA
WT HFD vs WT NCD	K06411	spoVFB; dipicolinate synthase subunit B	0.0119421	0.0403615	Inf	NA
WT HFD vs WT NCD	K06412	spoVG; stage V sporulation protein G	0.0124193	0.0403615	7.18586	4.4064
WT HFD vs WT NCD	K06859	pgi1; glucose-6-phosphate isomerase, archaeal [EC:5.3.1.9]	0.0121796	0.0403615	#VALUE!	NA
WT HFD vs WT NCD	K06894	K06894	0.0124193	0.0403615	-5.45153	1.98806
WT HFD vs WT NCD	K06896	mapP; maltose 6'-phosphate phosphatase [EC:3.1.3.90]	0.0124193	0.0403615	2.61071	1.79837
WT HFD vs WT NCD	K06923	K06923	0.0124193	0.0403615	7.55463	3.86228
WT HFD vs WT NCD	K06996	K06996	0.0124193	0.0403615	#VALUE!	NA
WT HFD vs WT NCD	K07138	K07138	0.0124193	0.0403615	-7.20783	2.70246
WT HFD vs WT NCD	K07181	K07181; putative signal transduction protein containing EAL and modified HD-GYP domains	0.0119421	0.0403615	Inf	NA
WT HFD vs WT NCD	K07263	pqqL; zinc protease [EC:3.4.24.-]	0.0124193	0.0403615	-6.05334	2.31725
WT HFD vs WT NCD	K07568	queA; S-adenosylmethionine:tRNA ribosyltransferase-isomerase [EC:2.4.99.17]	0.0124193	0.0403615	2.71879	1.93368
WT HFD vs WT NCD	K07576	K07576; metallo-beta-lactamase family protein	0.0124193	0.0403615	Inf	NA
WT HFD vs WT NCD	K07588	argK; LAO/AO transport system kinase [EC:2.7.-.-]	0.0124193	0.0403615	-6.03357	2.46779
WT HFD vs WT NCD	K07718	yesM; two-component system, sensor histidine kinase YesM [EC:2.7.13.3]	0.0124193	0.0403615	Inf	NA
WT HFD vs WT NCD	K07720	yesN; two-component system, response regulator YesN	0.0124193	0.0403615	Inf	NA
WT HFD vs WT NCD	K07722	nikR; CopG family transcriptional regulator, nickel-responsive regulator	0.0124193	0.0403615	2.21333	2.07449
WT HFD vs WT NCD	K08169	yebQ; MFS transporter, DHA2 family, multidrug resistance protein	0.0124193	0.0403615	-6.33157	2.4056
WT HFD vs WT NCD	K08218	ampG; MFS transporter, PAT family, beta-lactamase induction signal transducer AmpG	0.0124193	0.0403615	-6.21441	2.61595
WT HFD vs WT NCD	K08223	fsr; MFS transporter, FSR family, fosmidomycin resistance protein	0.0124193	0.0403615	-6.1468	2.28325
WT HFD vs WT NCD	K09002	csm3; CRISPR-associated protein Csm3	0.0118242	0.0403615	Inf	NA
WT HFD vs WT NCD	K09696	natB; sodium transport system permease protein	0.0122992	0.0403615	Inf	NA
WT HFD vs WT NCD	K09697	natA; sodium transport system ATP-binding protein	0.0122992	0.0403615	Inf	NA
WT HFD vs WT NCD	K09706	K09706; hypothetical protein	0.0119421	0.0403615	Inf	NA
WT HFD vs WT NCD	K09766	K09766; hypothetical protein	0.0119421	0.0403615	Inf	NA
WT HFD vs WT NCD	K09789	bioG; biotin synthesis protein BioG	0.0124193	0.0403615	-6.18965	2.83747
WT HFD vs WT NCD	K09808	ABC.LPT.P, lolC, lolE; lipoprotein-releasing system permease protein	0.0124193	0.0403615	-5.87554	2.43172
WT HFD vs WT NCD	K09810	ABC.LPT.A, lolD; lipoprotein-releasing system ATP-binding protein [EC:3.6.3.-]	0.0124193	0.0403615	-5.78291	2.48056
WT HFD vs WT NCD	K10188	lacE, araN; lactose/L-arabinose transport system substrate-binding protein	0.0119421	0.0403615	Inf	NA
WT HFD vs WT NCD	K10189	lacF, araP; lactose/L-arabinose transport system permease protein	0.0119421	0.0403615	Inf	NA
WT HFD vs WT NCD	K10190	lacG, araQ; lactose/L-arabinose transport system permease protein	0.0119421	0.0403615	Inf	NA
WT HFD vs WT NCD	K10540	mglB; methyl-galactoside transport system substrate-binding protein	0.0124193	0.0403615	Inf	NA
WT HFD vs WT NCD	K10541	mglC; methyl-galactoside transport system permease protein	0.0124193	0.0403615	Inf	NA
WT HFD vs WT NCD	K10542	mglA; methyl-galactoside transport system ATP-binding protein [EC:3.6.3.17]	0.0124193	0.0403615	Inf	NA
WT HFD vs WT NCD	K10797	enr; 2-enoate reductase [EC:1.3.1.31]	0.0119421	0.0403615	Inf	NA
WT HFD vs WT NCD	K11104	melB; melibiose permease	0.0124193	0.0403615	6.42049	4.24297
WT HFD vs WT NCD	K11618	liaR; two-component system, NarL family, response regulator LiaR	0.0124193	0.0403615	2.51103	1.80501
WT HFD vs WT NCD	K11782	mqnA; chorismate dehydratase [EC:4.2.1.151]	0.0122992	0.0403615	#VALUE!	NA
WT HFD vs WT NCD	K11785	mqnD; 1,4-dihydroxy-6-naphthoate synthase [EC:1.14.-.-]	0.0122992	0.0403615	#VALUE!	NA
WT HFD vs WT NCD	K12340	tolC; outer membrane protein	0.0124193	0.0403615	-6.32761	2.64243
WT HFD vs WT NCD	K13378	nuoCD; NADH-quinone oxidoreductase subunit C/D [EC:1.6.5.3]	0.0124193	0.0403615	-6.1503	2.29056
WT HFD vs WT NCD	K13747	nspC; carboxynorspermidine decarboxylase [EC:4.1.1.96]	0.0124193	0.0403615	-5.90123	2.21402
WT HFD vs WT NCD	K15726	czcA; cobalt-zinc-cadmium resistance protein CzcA	0.0124193	0.0403615	#VALUE!	NA
WT HFD vs WT NCD	K15923	AXY8, FUC95A, afcA; alpha-L-fucosidase 2 [EC:3.2.1.51]	0.0124193	0.0403615	-6.75746	2.7505
WT HFD vs WT NCD	K16089	TC.FEV.OM2, fepA, iroN, cirA, pfeA, cfrA, hmuR; outer membrane receptor for ferrienterochelin and colicins	0.0124193	0.0403615	-6.21452	2.38327
WT HFD vs WT NCD	K16092	btuB; vitamin B12 transporter	0.0122992	0.0403615	-4.82856	1.90413
WT HFD vs WT NCD	K16345	xanP; xanthine permease XanP	0.0124193	0.0403615	-5.90472	2.60725
WT HFD vs WT NCD	K16692	etk-wzc; tyrosine-protein kinase Etk/Wzc [EC:2.7.10.-]	0.0122992	0.0403615	Inf	NA
WT HFD vs WT NCD	K17234	araN; arabinosaccharide transport system substrate-binding protein	0.0119421	0.0403615	Inf	NA
WT HFD vs WT NCD	K17235	araP; arabinosaccharide transport system permease protein	0.0119421	0.0403615	Inf	NA
WT HFD vs WT NCD	K17236	araQ; arabinosaccharide transport system permease protein	0.0119421	0.0403615	Inf	NA
WT HFD vs WT NCD	K18138	acrB, mexB, adeJ, smeE, mtrD, cmeB; multidrug efflux pump	0.0124193	0.0403615	-6.12481	2.2837
WT HFD vs WT NCD	K18234	vat; virginiamycin A acetyltransferase [EC:2.3.1.-]	0.0124193	0.0403615	-4.68011	1.8367
WT HFD vs WT NCD	K18285	mqnE; aminodeoxyfutalosine synthase [EC:2.5.1.120]	0.0122992	0.0403615	#VALUE!	NA
WT HFD vs WT NCD	K18640	parM; plasmid segregation protein ParM	0.0122992	0.0403615	Inf	NA
WT HFD vs WT NCD	K11784	mqnC; cyclic dehypoxanthinyl futalosine synthase [EC:1.21.98.1]	0.0144682	0.0466168	#VALUE!	NA
WT HFD vs WT NCD	K00433	cpo; non-heme chloroperoxidase [EC:1.11.1.10]	0.0147426	0.0474451	Inf	NA
WT HFD vs WT NCD	K02651	flp, pilA; pilus assembly protein Flp/PilA	0.0147426	0.0474451	#VALUE!	NA
WT HFD vs WT NCD	K07003	K07003	0.0148806	0.0478331	Inf	NA
WT HFD vs WT NCD	K12527	ygfK; putative selenate reductase [EC:1.97.1.9]	0.0148806	0.0478331	Inf	NA
WT HFD vs WT NCD	K03605	hyaD, hybD; hydrogenase maturation protease [EC:3.4.23.-]	0.0150193	0.0482504	2.22533	2.03214
FPR1 HFD vs WT HFD	K00005	gldA; glycerol dehydrogenase [EC:1.1.1.6]	0.000760306	0.0083005	5.64305	1.15469
FPR1 HFD vs WT HFD	K00010	iolG; myo-inositol 2-dehydrogenase / D-chiro-inositol 1-dehydrogenase [EC:1.1.1.18 1.1.1.369]	0.000760306	0.0083005	5.68763	2.17052
FPR1 HFD vs WT HFD	K00024	mdh; malate dehydrogenase [EC:1.1.1.37]	0.000760306	0.0083005	8.43704	1.6866
FPR1 HFD vs WT HFD	K00029	E1.1.1.40, maeB; malate dehydrogenase (oxaloacetate-decarboxylating)(NADP+) [EC:1.1.1.40]	0.000760306	0.0083005	8.62322	1.77387
FPR1 HFD vs WT HFD	K00055	E1.1.1.90; aryl-alcohol dehydrogenase [EC:1.1.1.90]	0.000748989	0.0083005	Inf	NA
FPR1 HFD vs WT HFD	K00086	dhaT; 1,3-propanediol dehydrogenase [EC:1.1.1.202]	0.000726701	0.0083005	Inf	NA
FPR1 HFD vs WT HFD	K00097	pdxA; 4-hydroxythreonine-4-phosphate dehydrogenase [EC:1.1.1.262]	0.000760306	0.0083005	7.72992	1.63932
FPR1 HFD vs WT HFD	K00156	poxB; pyruvate dehydrogenase (quinone) [EC:1.2.5.1]	0.000760306	0.0083005	8.89843	1.93516
FPR1 HFD vs WT HFD	K00174	korA, oorA; 2-oxoglutarate ferredoxin oxidoreductase subunit alpha [EC:1.2.7.3]	0.000760306	0.0083005	5.50807	2.13191
FPR1 HFD vs WT HFD	K00175	korB, oorB; 2-oxoglutarate ferredoxin oxidoreductase subunit beta [EC:1.2.7.3]	0.000760306	0.0083005	5.66188	2.12346
FPR1 HFD vs WT HFD	K00176	korD, oorD; 2-oxoglutarate ferredoxin oxidoreductase subunit delta [EC:1.2.7.3]	0.000760306	0.0083005	4.97792	2.32741
FPR1 HFD vs WT HFD	K00177	korC, oorC; 2-oxoglutarate ferredoxin oxidoreductase subunit gamma [EC:1.2.7.3]	0.000760306	0.0083005	4.98455	2.32952
FPR1 HFD vs WT HFD	K00210	E1.3.1.12; prephenate dehydrogenase [EC:1.3.1.12]	0.000760306	0.0083005	Inf	NA
FPR1 HFD vs WT HFD	K00231	PPOX, hemY; oxygen-dependent protoporphyrinogen oxidase [EC:1.3.3.4]	0.000760306	0.0083005	6.84522	1.83419
FPR1 HFD vs WT HFD	K00239	sdhA, frdA; succinate dehydrogenase / fumarate reductase, flavoprotein subunit [EC:1.3.5.1 1.3.5.4]	0.000760306	0.0083005	4.65491	2.14967
FPR1 HFD vs WT HFD	K00240	sdhB, frdB; succinate dehydrogenase / fumarate reductase, iron-sulfur subunit [EC:1.3.5.1 1.3.5.4]	0.000760306	0.0083005	7.48142	1.71252
FPR1 HFD vs WT HFD	K00241	sdhC, frdC; succinate dehydrogenase / fumarate reductase, cytochrome b subunit	0.000760306	0.0083005	7.6789	1.65303
FPR1 HFD vs WT HFD	K00254	DHODH, pyrD; dihydroorotate dehydrogenase [EC:1.3.5.2]	0.000760306	0.0083005	7.1793	1.92975
FPR1 HFD vs WT HFD	K00257	E1.3.99.-	0.000760306	0.0083005	4.85351	1.83319
FPR1 HFD vs WT HFD	K00259	ald; alanine dehydrogenase [EC:1.4.1.1]	0.000760306	0.0083005	7.75125	1.77664
FPR1 HFD vs WT HFD	K00275	pdxH, PNPO; pyridoxamine 5'-phosphate oxidase [EC:1.4.3.5]	0.000760306	0.0083005	8.48543	1.8113
FPR1 HFD vs WT HFD	K00281	GLDC, gcvP; glycine dehydrogenase [EC:1.4.4.2]	0.000760306	0.0083005	8.09637	1.67472
FPR1 HFD vs WT HFD	K00330	nuoA; NADH-quinone oxidoreductase subunit A [EC:1.6.5.3]	0.000760306	0.0083005	7.98547	1.70368
FPR1 HFD vs WT HFD	K00331	nuoB; NADH-quinone oxidoreductase subunit B [EC:1.6.5.3]	0.000760306	0.0083005	7.9941	1.69903
FPR1 HFD vs WT HFD	K00337	nuoH; NADH-quinone oxidoreductase subunit H [EC:1.6.5.3]	0.000760306	0.0083005	7.98547	1.70368
FPR1 HFD vs WT HFD	K00338	nuoI; NADH-quinone oxidoreductase subunit I [EC:1.6.5.3]	0.000760306	0.0083005	7.6365	1.69489
FPR1 HFD vs WT HFD	K00339	nuoJ; NADH-quinone oxidoreductase subunit J [EC:1.6.5.3]	0.000760306	0.0083005	7.9941	1.69903
FPR1 HFD vs WT HFD	K00340	nuoK; NADH-quinone oxidoreductase subunit K [EC:1.6.5.3]	0.000760306	0.0083005	8.08666	1.83167
FPR1 HFD vs WT HFD	K00341	nuoL; NADH-quinone oxidoreductase subunit L [EC:1.6.5.3]	0.000760306	0.0083005	7.9941	1.69903
FPR1 HFD vs WT HFD	K00342	nuoM; NADH-quinone oxidoreductase subunit M [EC:1.6.5.3]	0.000760306	0.0083005	7.98547	1.70368
FPR1 HFD vs WT HFD	K00343	nuoN; NADH-quinone oxidoreductase subunit N [EC:1.6.5.3]	0.000760306	0.0083005	7.62703	1.69966
FPR1 HFD vs WT HFD	K00346	nqrA; Na+-transporting NADH:ubiquinone oxidoreductase subunit A [EC:1.6.5.-]	0.000760306	0.0083005	9.14755	1.7434
FPR1 HFD vs WT HFD	K00347	nqrB; Na+-transporting NADH:ubiquinone oxidoreductase subunit B [EC:1.6.5.-]	0.000760306	0.0083005	9.14755	1.7434
FPR1 HFD vs WT HFD	K00348	nqrC; Na+-transporting NADH:ubiquinone oxidoreductase subunit C [EC:1.6.5.-]	0.000760306	0.0083005	9.14755	1.7434
FPR1 HFD vs WT HFD	K00349	nqrD; Na+-transporting NADH:ubiquinone oxidoreductase subunit D [EC:1.6.5.-]	0.000760306	0.0083005	9.14755	1.7434
FPR1 HFD vs WT HFD	K00350	nqrE; Na+-transporting NADH:ubiquinone oxidoreductase subunit E [EC:1.6.5.-]	0.000760306	0.0083005	8.8242	1.71388
FPR1 HFD vs WT HFD	K00351	nqrF; Na+-transporting NADH:ubiquinone oxidoreductase subunit F [EC:1.6.5.-]	0.000760306	0.0083005	8.8242	1.71388
FPR1 HFD vs WT HFD	K00370	narG; nitrate reductase alpha subunit [EC:1.7.99.4]	0.000754633	0.0083005	8.25731	1.1174
FPR1 HFD vs WT HFD	K00371	narH; nitrate reductase beta subunit [EC:1.7.99.4]	0.000754633	0.0083005	7.85027	1.43574
FPR1 HFD vs WT HFD	K00373	narJ; nitrate reductase delta subunit	0.000754633	0.0083005	8.25731	1.1174
FPR1 HFD vs WT HFD	K00374	narI; nitrate reductase gamma subunit [EC:1.7.99.4]	0.000754633	0.0083005	7.85027	1.43574
FPR1 HFD vs WT HFD	K00375	K00375; GntR family transcriptional regulator / MocR family aminotransferase	0.000760306	0.0083005	-4.19214	1.90575
FPR1 HFD vs WT HFD	K00389	yidH; putative membrane protein	0.000754633	0.0083005	8.44803	2.16594
FPR1 HFD vs WT HFD	K00428	E1.11.1.5; cytochrome c peroxidase [EC:1.11.1.5]	0.000760306	0.0083005	7.78941	1.83274
FPR1 HFD vs WT HFD	K00547	mmuM; homocysteine S-methyltransferase [EC:2.1.1.10]	0.000760306	0.0083005	5.86542	1.01902
FPR1 HFD vs WT HFD	K00556	trmH; tRNA (guanosine-2'-O-)-methyltransferase [EC:2.1.1.34]	0.000748989	0.0083005	8.96888	1.51852
FPR1 HFD vs WT HFD	K00573	E2.1.1.77, pcm; protein-L-isoaspartate(D-aspartate) O-methyltransferase [EC:2.1.1.77]	0.000760306	0.0083005	7.60331	1.90464
FPR1 HFD vs WT HFD	K00603	fctD; glutamate formiminotransferase [EC:2.1.2.5]	0.000754633	0.0083005	9.08844	1.70486
FPR1 HFD vs WT HFD	K00605	gcvT, AMT; aminomethyltransferase [EC:2.1.2.10]	0.000760306	0.0083005	7.6518	1.66367
FPR1 HFD vs WT HFD	K00633	lacA; galactoside O-acetyltransferase [EC:2.3.1.18]	0.000754633	0.0083005	9.4944	1.45587
FPR1 HFD vs WT HFD	K00634	ptb; phosphate butyryltransferase [EC:2.3.1.19]	0.000760306	0.0083005	4.60565	1.92185
FPR1 HFD vs WT HFD	K00638	catB; chloramphenicol O-acetyltransferase type B [EC:2.3.1.28]	0.000760306	0.0083005	7.9687	1.58667
FPR1 HFD vs WT HFD	K00639	kbl, GCAT; glycine C-acetyltransferase [EC:2.3.1.29]	0.000760306	0.0083005	8.23949	1.63798
FPR1 HFD vs WT HFD	K00641	metX; homoserine O-acetyltransferase [EC:2.3.1.31]	0.000760306	0.0083005	6.34069	1.72789
FPR1 HFD vs WT HFD	K00647	fabB; 3-oxoacyl-[acyl-carrier-protein] synthase I [EC:2.3.1.41]	0.000760306	0.0083005	8.1056	1.60684
FPR1 HFD vs WT HFD	K00652	bioF; 8-amino-7-oxononanoate synthase [EC:2.3.1.47]	0.000760306	0.0083005	7.66089	1.62937
FPR1 HFD vs WT HFD	K00658	DLST, sucB; 2-oxoglutarate dehydrogenase E2 component (dihydrolipoamide succinyltransferase) [EC:2.3.1.61]	0.000760306	0.0083005	7.45909	1.59728
FPR1 HFD vs WT HFD	K00677	lpxA; UDP-N-acetylglucosamine acyltransferase [EC:2.3.1.129]	0.000760306	0.0083005	8.65829	1.66438
FPR1 HFD vs WT HFD	K00684	aat; leucyl/phenylalanyl-tRNA--protein transferase [EC:2.3.2.6]	0.000760306	0.0083005	7.23984	1.56186
FPR1 HFD vs WT HFD	K00689	E2.4.1.5; dextransucrase [EC:2.4.1.5]	0.000760306	0.0083005	7.90515	0.922088
FPR1 HFD vs WT HFD	K00721	DPM1; dolichol-phosphate mannosyltransferase [EC:2.4.1.83]	0.000760306	0.0083005	7.89639	1.75074
FPR1 HFD vs WT HFD	K00748	lpxB; lipid-A-disaccharide synthase [EC:2.4.1.182]	0.000760306	0.0083005	8.06672	1.66722
FPR1 HFD vs WT HFD	K00798	MMAB, pduO; cob(I)alamin adenosyltransferase [EC:2.5.1.17]	0.000760306	0.0083005	6.4501	1.5243
FPR1 HFD vs WT HFD	K00812	aspB; aspartate aminotransferase [EC:2.6.1.1]	0.000760306	0.0083005	8.53176	1.84791
FPR1 HFD vs WT HFD	K00819	rocD, OAT; ornithine--oxo-acid transaminase [EC:2.6.1.13]	0.000760306	0.0083005	6.50598	1.6265
FPR1 HFD vs WT HFD	K00823	puuE; 4-aminobutyrate aminotransferase [EC:2.6.1.19]	0.000760306	0.0083005	7.49189	1.40919
FPR1 HFD vs WT HFD	K00844	HK; hexokinase [EC:2.7.1.1]	0.000743374	0.0083005	Inf	NA
FPR1 HFD vs WT HFD	K00853	araB; L-ribulokinase [EC:2.7.1.16]	0.000760306	0.0083005	4.00198	1.37564
FPR1 HFD vs WT HFD	K00860	cysC; adenylylsulfate kinase [EC:2.7.1.25]	0.000760306	0.0083005	7.677	1.58892
FPR1 HFD vs WT HFD	K00895	E2.7.1.90, pfk; pyrophosphate--fructose-6-phosphate 1-phosphotransferase [EC:2.7.1.90]	0.000760306	0.0083005	9.02768	1.74914
FPR1 HFD vs WT HFD	K00912	lpxK; tetraacyldisaccharide 4'-kinase [EC:2.7.1.130]	0.000760306	0.0083005	8.41632	1.68695
FPR1 HFD vs WT HFD	K00929	E2.7.2.7, buk; butyrate kinase [EC:2.7.2.7]	0.000760306	0.0083005	7.59638	1.88428
FPR1 HFD vs WT HFD	K00940	ndk, NME; nucleoside-diphosphate kinase [EC:2.7.4.6]	0.000760306	0.0083005	4.74455	1.87616
FPR1 HFD vs WT HFD	K00946	thiL; thiamine-monophosphate kinase [EC:2.7.4.16]	0.000760306	0.0083005	8.75587	1.72329
FPR1 HFD vs WT HFD	K00970	pcnB; poly(A) polymerase [EC:2.7.7.19]	0.000760306	0.0083005	5.70725	1.98732
FPR1 HFD vs WT HFD	K00978	rfbF; glucose-1-phosphate cytidylyltransferase [EC:2.7.7.33]	0.000760306	0.0083005	9.35736	1.84316
FPR1 HFD vs WT HFD	K00979	kdsB; 3-deoxy-manno-octulosonate cytidylyltransferase (CMP-KDO synthetase) [EC:2.7.7.38]	0.000760306	0.0083005	7.89747	1.59501
FPR1 HFD vs WT HFD	K00983	E2.7.7.43, neuA, CMAS; N-acylneuraminate cytidylyltransferase [EC:2.7.7.43]	0.000760306	0.0083005	6.95891	1.69231
FPR1 HFD vs WT HFD	K00986	E2.7.7.49; RNA-directed DNA polymerase [EC:2.7.7.49]	0.000726701	0.0083005	Inf	NA
FPR1 HFD vs WT HFD	K01041	E2.8.3.-	0.000748989	0.0083005	Inf	NA
FPR1 HFD vs WT HFD	K01057	PGLS, pgl, devB; 6-phosphogluconolactonase [EC:3.1.1.31]	0.000760306	0.0083005	7.82649	2.0058
FPR1 HFD vs WT HFD	K01082	E3.1.3.7, cysQ, MET22, BPNT1; 3'(2'), 5'-bisphosphate nucleotidase [EC:3.1.3.7]	0.000760306	0.0083005	8.63818	1.80773
FPR1 HFD vs WT HFD	K01089	hisB; imidazoleglycerol-phosphate dehydratase / histidinol-phosphatase [EC:4.2.1.19 3.1.3.15]	0.000760306	0.0083005	9.20849	1.53433
FPR1 HFD vs WT HFD	K01130	E3.1.6.1, aslA; arylsulfatase [EC:3.1.6.1]	0.000760306	0.0083005	7.6977	1.60074
FPR1 HFD vs WT HFD	K01144	E3.1.11.5; exodeoxyribonuclease V [EC:3.1.11.5]	0.000760306	0.0083005	6.81033	1.88455
FPR1 HFD vs WT HFD	K01155	E3.1.21.4; type II restriction enzyme [EC:3.1.21.4]	0.000760306	0.0083005	5.57873	1.49113
FPR1 HFD vs WT HFD	K01159	ruvC; crossover junction endodeoxyribonuclease RuvC [EC:3.1.22.4]	0.000760306	0.0083005	4.86253	2.24666
FPR1 HFD vs WT HFD	K01163	K01163; hypothetical protein	0.000760306	0.0083005	8.49777	1.88907
FPR1 HFD vs WT HFD	K01173	ENDOG; endonuclease G, mitochondrial	0.000760306	0.0083005	9.09355	1.90948
FPR1 HFD vs WT HFD	K01186	NEU1; sialidase-1 [EC:3.2.1.18]	0.000754633	0.0083005	9.55724	1.7702
FPR1 HFD vs WT HFD	K01194	E3.2.1.28, treA, treF; alpha,alpha-trehalase [EC:3.2.1.28]	0.000737787	0.0083005	6.44619	1.29858
FPR1 HFD vs WT HFD	K01197	hya; hyaluronoglucosaminidase [EC:3.2.1.35]	0.000760306	0.0083005	8.94475	1.78172
FPR1 HFD vs WT HFD	K01201	GBA, srfJ; glucosylceramidase [EC:3.2.1.45]	0.000760306	0.0083005	6.27534	1.57327
FPR1 HFD vs WT HFD	K01205	NAGLU; alpha-N-acetylglucosaminidase [EC:3.2.1.50]	0.000754633	0.0083005	9.761	1.71993
FPR1 HFD vs WT HFD	K01216	E3.2.1.73; licheninase [EC:3.2.1.73]	0.000760306	0.0083005	Inf	NA
FPR1 HFD vs WT HFD	K01235	aguA; alpha-glucuronidase [EC:3.2.1.139]	0.000760306	0.0083005	8.42018	1.76871
FPR1 HFD vs WT HFD	K01241	amn; AMP nucleosidase [EC:3.2.2.4]	0.000760306	0.0083005	8.26693	1.76313
FPR1 HFD vs WT HFD	K01250	rihA; pyrimidine-specific ribonucleoside hydrolase [EC:3.2.-.-]	0.000754633	0.0083005	10.141	1.1438
FPR1 HFD vs WT HFD	K01277	DPP3; dipeptidyl-peptidase III [EC:3.4.14.4]	0.000754633	0.0083005	9.5071	1.71881
FPR1 HFD vs WT HFD	K01278	DPP4; dipeptidyl-peptidase 4 [EC:3.4.14.5]	0.000760306	0.0083005	8.743	1.75012
FPR1 HFD vs WT HFD	K01284	dcp; peptidyl-dipeptidase Dcp [EC:3.4.15.5]	0.000760306	0.0083005	8.99775	1.70643
FPR1 HFD vs WT HFD	K01297	ldcA; muramoyltetrapeptide carboxypeptidase [EC:3.4.17.13]	0.000760306	0.0083005	8.28092	1.52371
FPR1 HFD vs WT HFD	K01322	PREP; prolyl oligopeptidase [EC:3.4.21.26]	0.000760306	0.0083005	Inf	NA
FPR1 HFD vs WT HFD	K01338	lon; ATP-dependent Lon protease [EC:3.4.21.53]	0.000760306	0.0083005	7.13848	1.56928
FPR1 HFD vs WT HFD	K01422	AXL1; protease AXL1 [EC:3.4.24.-]	0.000760306	0.0083005	Inf	NA
FPR1 HFD vs WT HFD	K01428	ureC; urease subunit alpha [EC:3.5.1.5]	0.000760306	0.0083005	4.17336	1.69374
FPR1 HFD vs WT HFD	K01429	ureB; urease subunit beta [EC:3.5.1.5]	0.000760306	0.0083005	4.33278	1.65129
FPR1 HFD vs WT HFD	K01430	ureA; urease subunit gamma [EC:3.5.1.5]	0.000760306	0.0083005	4.33278	1.65129
FPR1 HFD vs WT HFD	K01433	purU; formyltetrahydrofolate deformylase [EC:3.5.1.10]	0.000760306	0.0083005	6.63556	1.75373
FPR1 HFD vs WT HFD	K01447	E3.5.1.28A, cwlA, xlyA, xlyB; N-acetylmuramoyl-L-alanine amidase [EC:3.5.1.28]	0.000760306	0.0083005	6.47716	1.68599
FPR1 HFD vs WT HFD	K01468	hutI, AMDHD1; imidazolonepropionase [EC:3.5.2.7]	0.000760306	0.0083005	8.09979	1.70841
FPR1 HFD vs WT HFD	K01476	E3.5.3.1, rocF, arg; arginase [EC:3.5.3.1]	0.000754633	0.0083005	6.62352	1.67759
FPR1 HFD vs WT HFD	K01480	speB; agmatinase [EC:3.5.3.11]	0.000760306	0.0083005	6.16563	1.5436
FPR1 HFD vs WT HFD	K01485	codA; cytosine deaminase [EC:3.5.4.1]	0.000760306	0.0083005	6.68888	1.67967
FPR1 HFD vs WT HFD	K01492	E2.1.2.3; phosphoribosylaminoimidazolecarboxamide formyltransferase [EC:2.1.2.3]	0.000754633	0.0083005	7.12985	1.7402
FPR1 HFD vs WT HFD	K01546	kdpA; K+-transporting ATPase ATPase A chain [EC:3.6.3.12]	0.000760306	0.0083005	4.58827	2.14473
FPR1 HFD vs WT HFD	K01547	kdpB; K+-transporting ATPase ATPase B chain [EC:3.6.3.12]	0.000760306	0.0083005	4.58827	2.14473
FPR1 HFD vs WT HFD	K01548	kdpC; K+-transporting ATPase ATPase C chain [EC:3.6.3.12]	0.000760306	0.0083005	4.58827	2.14473
FPR1 HFD vs WT HFD	K01573	oadG; oxaloacetate decarboxylase, gamma subunit [EC:4.1.1.3]	0.000754633	0.0083005	8.50602	1.70998
FPR1 HFD vs WT HFD	K01585	speA; arginine decarboxylase [EC:4.1.1.19]	0.000760306	0.0083005	8.42261	1.6876
FPR1 HFD vs WT HFD	K01590	hdc, HDC; histidine decarboxylase [EC:4.1.1.22]	0.000748989	0.0083005	Inf	NA
FPR1 HFD vs WT HFD	K01599	hemE, UROD; uroporphyrinogen decarboxylase [EC:4.1.1.37]	0.000760306	0.0083005	6.9396	1.58325
FPR1 HFD vs WT HFD	K01611	speD, AMD1; S-adenosylmethionine decarboxylase [EC:4.1.1.50]	0.000760306	0.0083005	9.3058	1.54945
FPR1 HFD vs WT HFD	K01627	kdsA; 2-dehydro-3-deoxyphosphooctonate aldolase (KDO 8-P synthase) [EC:2.5.1.55]	0.000760306	0.0083005	8.49512	1.65566
FPR1 HFD vs WT HFD	K01639	E4.1.3.3, nanA, NPL; N-acetylneuraminate lyase [EC:4.1.3.3]	0.000760306	0.0083005	8.09066	1.51771
FPR1 HFD vs WT HFD	K01665	pabB; para-aminobenzoate synthetase component I [EC:2.6.1.85]	0.000760306	0.0083005	7.01904	1.5056
FPR1 HFD vs WT HFD	K01666	mhpE; 4-hydroxy 2-oxovalerate aldolase [EC:4.1.3.39]	0.000760306	0.0083005	7.50334	1.82549
FPR1 HFD vs WT HFD	K01667	tnaA; tryptophanase [EC:4.1.99.1]	0.000754633	0.0083005	9.16741	1.44655
FPR1 HFD vs WT HFD	K01676	E4.2.1.2A, fumA, fumB; fumarate hydratase, class I [EC:4.2.1.2]	0.000760306	0.0083005	8.57444	1.48892
FPR1 HFD vs WT HFD	K01698	hemB, ALAD; porphobilinogen synthase [EC:4.2.1.24]	0.000760306	0.0083005	6.19216	1.3434
FPR1 HFD vs WT HFD	K01699	pduC; propanediol dehydratase large subunit [EC:4.2.1.28]	0.000748989	0.0083005	Inf	NA
FPR1 HFD vs WT HFD	K01709	rfbG; CDP-glucose 4,6-dehydratase [EC:4.2.1.45]	0.000760306	0.0083005	9.62215	1.7318
FPR1 HFD vs WT HFD	K01712	hutU, UROC1; urocanate hydratase [EC:4.2.1.49]	0.000760306	0.0083005	8.02187	1.69416
FPR1 HFD vs WT HFD	K01719	hemD, UROS; uroporphyrinogen-III synthase [EC:4.2.1.75]	0.000760306	0.0083005	7.21862	1.68375
FPR1 HFD vs WT HFD	K01730	ogl; oligogalacturonide lyase [EC:4.2.2.6]	0.000760306	0.0083005	8.16358	1.54187
FPR1 HFD vs WT HFD	K01744	aspA; aspartate ammonia-lyase [EC:4.3.1.1]	0.000760306	0.0083005	7.63421	1.45521
FPR1 HFD vs WT HFD	K01745	hutH, HAL; histidine ammonia-lyase [EC:4.3.1.3]	0.000760306	0.0083005	8.19368	1.69014
FPR1 HFD vs WT HFD	K01749	hemC, HMBS; hydroxymethylbilane synthase [EC:2.5.1.61]	0.000760306	0.0083005	6.58563	1.39892
FPR1 HFD vs WT HFD	K01750	E4.3.1.12, ocd; ornithine cyclodeaminase [EC:4.3.1.12]	0.000760306	0.0083005	5.8395	2.14297
FPR1 HFD vs WT HFD	K01771	E4.6.1.13, plc; 1-phosphatidylinositol phosphodiesterase [EC:4.6.1.13]	0.000748989	0.0083005	Inf	NA
FPR1 HFD vs WT HFD	K01787	RENBP; N-acylglucosamine 2-epimerase [EC:5.1.3.8]	0.000754633	0.0083005	9.67651	1.74911
FPR1 HFD vs WT HFD	K01802	E5.2.1.8; peptidylprolyl isomerase [EC:5.2.1.8]	0.000760306	0.0083005	6.73294	2.01172
FPR1 HFD vs WT HFD	K01818	fucI; L-fucose isomerase [EC:5.3.1.25]	0.000760306	0.0083005	8.66357	1.58841
FPR1 HFD vs WT HFD	K01840	manB; phosphomannomutase [EC:5.4.2.8]	0.000760306	0.0083005	7.52609	2.09127
FPR1 HFD vs WT HFD	K01843	kamA; lysine 2,3-aminomutase [EC:5.4.3.2]	0.000760306	0.0083005	8.97434	1.9655
FPR1 HFD vs WT HFD	K01845	hemL; glutamate-1-semialdehyde 2,1-aminomutase [EC:5.4.3.8]	0.000754633	0.0083005	6.27777	1.29503
FPR1 HFD vs WT HFD	K01847	MUT; methylmalonyl-CoA mutase [EC:5.4.99.2]	0.000760306	0.0083005	9.0575	1.92519
FPR1 HFD vs WT HFD	K01858	INO1, ISYNA1; myo-inositol-1-phosphate synthase [EC:5.5.1.4]	0.000760306	0.0083005	7.65334	1.93472
FPR1 HFD vs WT HFD	K01897	ACSL, fadD; long-chain acyl-CoA synthetase [EC:6.2.1.3]	0.000760306	0.0083005	8.20047	1.79521
FPR1 HFD vs WT HFD	K01902	sucD; succinyl-CoA synthetase alpha subunit [EC:6.2.1.5]	0.000760306	0.0083005	6.02773	1.59376
FPR1 HFD vs WT HFD	K01903	sucC; succinyl-CoA synthetase beta subunit [EC:6.2.1.5]	0.000760306	0.0083005	6.02773	1.59376
FPR1 HFD vs WT HFD	K01919	gshA; glutamate--cysteine ligase [EC:6.3.2.2]	0.000760306	0.0083005	4.43488	1.93037
FPR1 HFD vs WT HFD	K01950	E6.3.5.1, NADSYN1, QNS1, nadE; NAD+ synthase (glutamine-hydrolysing) [EC:6.3.5.1]	0.000760306	0.0083005	5.2193	2.25425
FPR1 HFD vs WT HFD	K01960	pycB; pyruvate carboxylase subunit B [EC:6.4.1.1]	0.000754633	0.0083005	9.22622	1.70611
FPR1 HFD vs WT HFD	K01966	PCCB, pccB; propionyl-CoA carboxylase beta chain [EC:6.4.1.3]	0.000760306	0.0083005	Inf	NA
FPR1 HFD vs WT HFD	K01991	ABC-2.OM, wza; polysaccharide export outer membrane protein	0.000760306	0.0083005	8.66872	1.71831
FPR1 HFD vs WT HFD	K01993	ABC-2.TX; HlyD family secretion protein	0.000760306	0.0083005	8.99876	1.57214
FPR1 HFD vs WT HFD	K02009	cbiN; cobalt/nickel transport protein	0.000760306	0.0083005	8.43588	1.5552
FPR1 HFD vs WT HFD	K02014	TC.FEV.OM; iron complex outermembrane recepter protein	0.000760306	0.0083005	8.43478	1.72488
FPR1 HFD vs WT HFD	K02065	mlaF, linL, mkl; phospholipid/cholesterol/gamma-HCH transport system ATP-binding protein	0.000760306	0.0083005	8.15591	1.81615
FPR1 HFD vs WT HFD	K02066	mlaE, linK; phospholipid/cholesterol/gamma-HCH transport system permease protein	0.000760306	0.0083005	7.85463	2.01906
FPR1 HFD vs WT HFD	K02067	mlaD, linM; phospholipid/cholesterol/gamma-HCH transport system substrate-binding protein	0.000760306	0.0083005	7.84467	2.02772
FPR1 HFD vs WT HFD	K02076	zurR, zur; Fur family transcriptional regulator, zinc uptake regulator	0.000754633	0.0083005	6.63597	1.70709
FPR1 HFD vs WT HFD	K02080	agaI; galactosamine-6-phosphate isomerase [EC:5.3.1.-]	0.000699486	0.0083005	3.79219	1.74004
FPR1 HFD vs WT HFD	K02117	ATPVA, ntpA, atpA; V/A-type H+-transporting ATPase subunit A [EC:3.6.3.14]	0.000760306	0.0083005	7.8338	2.07329
FPR1 HFD vs WT HFD	K02121	ATPVE, ntpE, atpE; V/A-type H+-transporting ATPase subunit E	0.000760306	0.0083005	7.8338	2.07329
FPR1 HFD vs WT HFD	K02169	bioC; malonyl-CoA O-methyltransferase [EC:2.1.1.197]	0.000760306	0.0083005	8.15222	1.63305
FPR1 HFD vs WT HFD	K02190	cbiK; sirohydrochlorin cobaltochelatase [EC:4.99.1.3]	0.000760306	0.0083005	9.36657	1.30231
FPR1 HFD vs WT HFD	K02191	cbiT; cobalt-precorrin-6B (C15)-methyltransferase [EC:2.1.1.196]	0.000760306	0.0083005	9.31525	1.22823
FPR1 HFD vs WT HFD	K02217	ftnA, ftn; ferritin [EC:1.16.3.2]	0.000760306	0.0083005	5.62792	2.15073
FPR1 HFD vs WT HFD	K02230	cobN; cobaltochelatase CobN [EC:6.6.1.2]	0.000760306	0.0083005	Inf	NA
FPR1 HFD vs WT HFD	K02304	MET8; precorrin-2 dehydrogenase / sirohydrochlorin ferrochelatase [EC:1.3.1.76 4.99.1.4]	0.000760306	0.0083005	6.87936	1.20618
FPR1 HFD vs WT HFD	K02361	entC; isochorismate synthase [EC:5.4.4.2]	0.000760306	0.0083005	8.47995	1.70867
FPR1 HFD vs WT HFD	K02377	TSTA3, fcl; GDP-L-fucose synthase [EC:1.1.1.271]	0.000760306	0.0083005	8.42189	1.68823
FPR1 HFD vs WT HFD	K02426	sufE; cysteine desulfuration protein SufE	0.000760306	0.0083005	8.50911	1.60579
FPR1 HFD vs WT HFD	K02429	fucP; MFS transporter, FHS family, L-fucose permease	0.000760306	0.0083005	8.82482	1.47362
FPR1 HFD vs WT HFD	K02437	gcvH, GCSH; glycine cleavage system H protein	0.000760306	0.0083005	7.4569	1.57385
FPR1 HFD vs WT HFD	K02472	wecC; UDP-N-acetyl-D-mannosaminuronic acid dehydrogenase [EC:1.1.1.336]	0.000760306	0.0083005	7.70608	1.64787
FPR1 HFD vs WT HFD	K02473	E5.1.3.7, wbpP; UDP-N-acetylglucosamine 4-epimerase [EC:5.1.3.7]	0.000748989	0.0083005	Inf	NA
FPR1 HFD vs WT HFD	K02474	wbpO; UDP-N-acetyl-D-galactosamine dehydrogenase [EC:1.1.1.-]	0.000754633	0.0083005	Inf	NA
FPR1 HFD vs WT HFD	K02477	K02477; two-component system, LytT family, response regulator	0.000760306	0.0083005	8.74871	1.56513
FPR1 HFD vs WT HFD	K02481	K02481; two-component system, NtrC family, response regulator	0.000743374	0.0083005	Inf	NA
FPR1 HFD vs WT HFD	K02492	hemA; glutamyl-tRNA reductase [EC:1.2.1.70]	0.000760306	0.0083005	3.59856	2.04024
FPR1 HFD vs WT HFD	K02509	hpaH; 2-oxo-hept-3-ene-1,7-dioate hydratase [EC:4.2.1.-]	0.000760306	0.0083005	Inf	NA
FPR1 HFD vs WT HFD	K02517	lpxL, htrB; KDO2-lipid IV(A) lauroyltransferase [EC:2.3.1.241]	0.000760306	0.0083005	7.89011	1.81737
FPR1 HFD vs WT HFD	K02523	ispB; octaprenyl-diphosphate synthase [EC:2.5.1.90]	0.000760306	0.0083005	8.19715	1.6079
FPR1 HFD vs WT HFD	K02525	kdgR; LacI family transcriptional regulator, kdg operon repressor	0.000754633	0.0083005	Inf	NA
FPR1 HFD vs WT HFD	K02527	kdtA, waaA; 3-deoxy-D-manno-octulosonic-acid transferase [EC:2.4.99.12 2.4.99.13 2.4.99.14 2.4.99.15]	0.000760306	0.0083005	8.26731	1.75364
FPR1 HFD vs WT HFD	K02536	lpxD; UDP-3-O-[3-hydroxymyristoyl] glucosamine N-acyltransferase [EC:2.3.1.191]	0.000760306	0.0083005	8.31398	1.56169
FPR1 HFD vs WT HFD	K02566	nagD; NagD protein	0.000737787	0.0083005	8.88095	1.99041
FPR1 HFD vs WT HFD	K02575	NRT, narK, nrtP, nasA; MFS transporter, NNP family, nitrate/nitrite transporter	0.000760306	0.0083005	7.23162	1.09508
FPR1 HFD vs WT HFD	K02619	pabC; 4-amino-4-deoxychorismate lyase [EC:4.1.3.38]	0.000760306	0.0083005	6.93632	1.54665
FPR1 HFD vs WT HFD	K02651	flp, pilA; pilus assembly protein Flp/PilA	0.000748989	0.0083005	Inf	NA
FPR1 HFD vs WT HFD	K02784	PTS-HPR.PTSH, ptsH; phosphocarrier protein HPr	0.000704872	0.0083005	7.68862	1.22342
FPR1 HFD vs WT HFD	K02839	prfH; peptide chain release factor	0.000754633	0.0083005	9.43781	1.45403
FPR1 HFD vs WT HFD	K02840	waaB, rfaB; UDP-D-galactose:(glucosyl)LPS alpha-1,6-D-galactosyltransferase [EC:2.4.1.-]	0.000754633	0.0083005	Inf	NA
FPR1 HFD vs WT HFD	K02856	rhaT; L-rhamnose-H+ transport protein	0.000760306	0.0083005	8.10527	1.583
FPR1 HFD vs WT HFD	K02858	ribB, RIB3; 3,4-dihydroxy 2-butanone 4-phosphate synthase [EC:4.1.99.12]	0.000760306	0.0083005	7.89082	1.49426
FPR1 HFD vs WT HFD	K02897	RP-L25, rplY; large subunit ribosomal protein L25	0.000760306	0.0083005	6.56177	1.68019
FPR1 HFD vs WT HFD	K03077	ulaF, sgaE; L-ribulose-5-phosphate 4-epimerase [EC:5.1.3.4]	0.000760306	0.0083005	9.37838	1.55673
FPR1 HFD vs WT HFD	K03092	SIG54, rpoN; RNA polymerase sigma-54 factor	0.000760306	0.0083005	6.2252	1.67974
FPR1 HFD vs WT HFD	K03113	EIF1, SUI1; translation initiation factor 1	0.000760306	0.0083005	9.05909	1.57445
FPR1 HFD vs WT HFD	K03118	tatC; sec-independent protein translocase protein TatC	0.000760306	0.0083005	5.41037	2.23447
FPR1 HFD vs WT HFD	K03146	THI4, THI1; thiamine thiazole synthase	0.000485389	0.0083005	Inf	NA
FPR1 HFD vs WT HFD	K03149	thiG; thiazole synthase [EC:2.8.1.10]	0.000760306	0.0083005	6.91806	1.51249
FPR1 HFD vs WT HFD	K03179	ubiA; 4-hydroxybenzoate polyprenyltransferase [EC:2.5.1.39]	0.000760306	0.0083005	4.91174	1.68127
FPR1 HFD vs WT HFD	K03187	ureE; urease accessory protein	0.000760306	0.0083005	4.10425	1.73037
FPR1 HFD vs WT HFD	K03188	ureF; urease accessory protein	0.000760306	0.0083005	4.17336	1.69374
FPR1 HFD vs WT HFD	K03189	ureG; urease accessory protein	0.000760306	0.0083005	4.06979	1.77589
FPR1 HFD vs WT HFD	K03190	ureD, ureH; urease accessory protein	0.000760306	0.0083005	4.07948	1.77077
FPR1 HFD vs WT HFD	K03269	lpxH; UDP-2,3-diacylglucosamine hydrolase [EC:3.6.1.54]	0.000760306	0.0083005	8.60906	1.62552
FPR1 HFD vs WT HFD	K03270	kdsC; 3-deoxy-D-manno-octulosonate 8-phosphate phosphatase (KDO 8-P phosphatase) [EC:3.1.3.45]	0.000760306	0.0083005	8.60906	1.62552
FPR1 HFD vs WT HFD	K03274	gmhD, rfaD; ADP-L-glycero-D-manno-heptose 6-epimerase [EC:5.1.3.20]	0.000760306	0.0083005	6.76229	1.61923
FPR1 HFD vs WT HFD	K03281	TC.CIC; chloride channel protein, CIC family	0.000760306	0.0083005	8.89176	1.46437
FPR1 HFD vs WT HFD	K03296	TC.HAE1; hydrophobic/amphiphilic exporter-1 (mainly G- bacteria), HAE1 family	0.000760306	0.0083005	5.32483	1.59383
FPR1 HFD vs WT HFD	K03299	TC.GNTP; gluconate:H+ symporter, GntP family	0.000760306	0.0083005	6.55808	1.42493
FPR1 HFD vs WT HFD	K03307	TC.SSS; solute:Na+ symporter, SSS family	0.000760306	0.0083005	4.91569	2.19791
FPR1 HFD vs WT HFD	K03313	nhaA; Na+:H+ antiporter, NhaA family	0.000760306	0.0083005	4.89129	2.24578
FPR1 HFD vs WT HFD	K03327	TC.MATE, SLC47A, norM, mdtK, dinF; multidrug resistance protein, MATE family	0.000760306	0.0083005	8.55097	1.67123
FPR1 HFD vs WT HFD	K03388	hdrA; heterodisulfide reductase subunit A [EC:1.8.98.1]	0.00071573	0.0083005	Inf	NA
FPR1 HFD vs WT HFD	K03389	hdrB; heterodisulfide reductase subunit B [EC:1.8.98.1]	0.000683497	0.0083005	Inf	NA
FPR1 HFD vs WT HFD	K03390	hdrC; heterodisulfide reductase subunit C [EC:1.8.98.1]	0.00071573	0.0083005	Inf	NA
FPR1 HFD vs WT HFD	K03394	cobI-cbiL; precorrin-2/cobalt-factor-2 C20-methyltransferase [EC:2.1.1.130 2.1.1.151]	0.000760306	0.0083005	9.00299	1.42803
FPR1 HFD vs WT HFD	K03399	cbiE; cobalt-precorrin-7 (C5)-methyltransferase [EC:2.1.1.289]	0.000760306	0.0083005	9.3018	1.22969
FPR1 HFD vs WT HFD	K03430	phnW; 2-aminoethylphosphonate-pyruvate transaminase [EC:2.6.1.37]	0.000760306	0.0083005	9.03851	1.56824
FPR1 HFD vs WT HFD	K03444	MFS.SP; MFS transporter, SP family, sugar porter, other	0.000743374	0.0083005	Inf	NA
FPR1 HFD vs WT HFD	K03446	emrB; MFS transporter, DHA2 family, multidrug resistance protein	0.000760306	0.0083005	7.99901	1.67474
FPR1 HFD vs WT HFD	K03449	MFS.CP; MFS transporter, CP family, cyanate transporter	0.000760306	0.0083005	7.20536	1.23346
FPR1 HFD vs WT HFD	K03453	TC.BASS; bile acid:Na+ symporter, BASS family	0.000760306	0.0083005	7.4447	1.44603
FPR1 HFD vs WT HFD	K03473	pdxB; erythronate-4-phosphate dehydrogenase [EC:1.1.1.290]	0.000760306	0.0083005	9.20847	1.53432
FPR1 HFD vs WT HFD	K03474	pdxJ; pyridoxine 5-phosphate synthase [EC:2.6.99.2]	0.000760306	0.0083005	8.37793	1.70666
FPR1 HFD vs WT HFD	K03503	DPO5D, umuD; DNA polymerase V [EC:3.4.21.-]	0.000760306	0.0083005	8.83572	1.49557
FPR1 HFD vs WT HFD	K03526	gcpE, ispG; (E)-4-hydroxy-3-methylbut-2-enyl-diphosphate synthase [EC:1.17.7.1 1.17.7.3]	0.000760306	0.0083005	4.72495	2.1945
FPR1 HFD vs WT HFD	K03534	rhaM; L-rhamnose mutarotase [EC:5.1.3.32]	0.000760306	0.0083005	5.20987	2.14127
FPR1 HFD vs WT HFD	K03543	emrA; membrane fusion protein, multidrug efflux system	0.000760306	0.0083005	7.45016	1.57352
FPR1 HFD vs WT HFD	K03558	cvpA; membrane protein required for colicin V production	0.000760306	0.0083005	7.24794	1.70938
FPR1 HFD vs WT HFD	K03559	exbD; biopolymer transport protein ExbD	0.000760306	0.0083005	7.89453	1.93151
FPR1 HFD vs WT HFD	K03561	exbB; biopolymer transport protein ExbB	0.000760306	0.0083005	8.69675	1.76559
FPR1 HFD vs WT HFD	K03564	BCP, PRXQ, DOT5; peroxiredoxin Q/BCP [EC:1.11.1.15]	0.000760306	0.0083005	7.3057	1.6925
FPR1 HFD vs WT HFD	K03585	acrA, mexA, adeI, smeD, mtrC, cmeA; membrane fusion protein, multidrug efflux system	0.000760306	0.0083005	9.16932	1.75189
FPR1 HFD vs WT HFD	K03587	ftsI; cell division protein FtsI (penicillin-binding protein 3)	0.000760306	0.0083005	5.34013	2.22281
FPR1 HFD vs WT HFD	K03593	mrp, NUBPL; ATP-binding protein involved in chromosome partitioning	0.000760306	0.0083005	6.9949	1.73725
FPR1 HFD vs WT HFD	K03594	bfr; bacterioferritin [EC:1.16.3.1]	0.000760306	0.0083005	8.23154	1.7532
FPR1 HFD vs WT HFD	K03606	wcaJ; putative colanic acid biosysnthesis UDP-glucose lipid carrier transferase	0.000760306	0.0083005	9.63207	1.58386
FPR1 HFD vs WT HFD	K03614	rnfD; electron transport complex protein RnfD	0.000760306	0.0083005	8.07289	1.55606
FPR1 HFD vs WT HFD	K03635	MOCS2, moaE; molybdopterin synthase catalytic subunit [EC:2.8.1.12]	0.000760306	0.0083005	5.91311	1.57292
FPR1 HFD vs WT HFD	K03636	moaD; molybdopterin synthase sulfur carrier subunit	0.000760306	0.0083005	6.24068	1.38877
FPR1 HFD vs WT HFD	K03638	moaB; molybdenum cofactor biosynthesis protein B	0.000760306	0.0083005	6.44357	1.28047
FPR1 HFD vs WT HFD	K03644	lipA; lipoic acid synthetase [EC:2.8.1.8]	0.000760306	0.0083005	7.68461	1.64827
FPR1 HFD vs WT HFD	K03651	icc; Icc protein	0.000754633	0.0083005	9.80935	1.51308
FPR1 HFD vs WT HFD	K03658	helD; DNA helicase IV [EC:3.6.4.12]	0.000748989	0.0083005	6.30727	1.52442
FPR1 HFD vs WT HFD	K03688	ubiB, aarF; ubiquinone biosynthesis protein	0.000760306	0.0083005	3.70972	2.14044
FPR1 HFD vs WT HFD	K03694	clpA; ATP-dependent Clp protease ATP-binding subunit ClpA	0.000760306	0.0083005	7.07472	1.62947
FPR1 HFD vs WT HFD	K03718	asnC; Lrp/AsnC family transcriptional regulator, regulator for asnA, asnC and gidA	0.000760306	0.0083005	8.73943	1.57755
FPR1 HFD vs WT HFD	K03719	lrp; Lrp/AsnC family transcriptional regulator, leucine-responsive regulatory protein	0.000760306	0.0083005	7.09264	1.20908
FPR1 HFD vs WT HFD	K03742	pncC; nicotinamide-nucleotide amidase [EC:3.5.1.42]	0.000760306	0.0083005	7.66907	1.46289
FPR1 HFD vs WT HFD	K03743	pncC; nicotinamide-nucleotide amidase [EC:3.5.1.42]	0.000760306	0.0083005	7.59281	1.7827
FPR1 HFD vs WT HFD	K03748	sanA; SanA protein	0.000760306	0.0083005	8.6511	1.53902
FPR1 HFD vs WT HFD	K03753	mobB; molybdopterin-guanine dinucleotide biosynthesis protein B	0.000760306	0.0083005	6.24533	1.2658
FPR1 HFD vs WT HFD	K03760	eptA; lipid A ethanolaminephosphotransferase [EC:2.7.8.-]	0.000760306	0.0083005	7.47784	1.63975
FPR1 HFD vs WT HFD	K03770	ppiD; peptidyl-prolyl cis-trans isomerase D [EC:5.2.1.8]	0.000760306	0.0083005	8.34579	1.71908
FPR1 HFD vs WT HFD	K03771	surA; peptidyl-prolyl cis-trans isomerase SurA [EC:5.2.1.8]	0.000760306	0.0083005	8.54653	1.65354
FPR1 HFD vs WT HFD	K03772	fkpA; FKBP-type peptidyl-prolyl cis-trans isomerase FkpA [EC:5.2.1.8]	0.000760306	0.0083005	9.14571	1.45392
FPR1 HFD vs WT HFD	K03773	fklB; FKBP-type peptidyl-prolyl cis-trans isomerase FklB [EC:5.2.1.8]	0.000760306	0.0083005	9.40743	1.6098
FPR1 HFD vs WT HFD	K03775	slyD; FKBP-type peptidyl-prolyl cis-trans isomerase SlyD [EC:5.2.1.8]	0.000760306	0.0083005	8.51045	1.65187
FPR1 HFD vs WT HFD	K03781	katE, CAT, catB, srpA; catalase [EC:1.11.1.6]	0.000760306	0.0083005	6.04791	1.94148
FPR1 HFD vs WT HFD	K03786	aroQ, qutE; 3-dehydroquinate dehydratase II [EC:4.2.1.10]	0.000760306	0.0083005	4.89218	2.26114
FPR1 HFD vs WT HFD	K03801	lipB; lipoyl(octanoyl) transferase [EC:2.3.1.181]	0.000760306	0.0083005	8.28949	1.76233
FPR1 HFD vs WT HFD	K03803	rseC; sigma-E factor negative regulatory protein RseC	0.000760306	0.0083005	8.45122	1.5483
FPR1 HFD vs WT HFD	K03814	mtgA; monofunctional biosynthetic peptidoglycan transglycosylase [EC:2.4.1.-]	0.000760306	0.0083005	8.17064	1.6652
FPR1 HFD vs WT HFD	K03818	wcaF; putative colanic acid biosynthesis acetyltransferase WcaF [EC:2.3.1.-]	0.000760306	0.0083005	8.12035	1.54742
FPR1 HFD vs WT HFD	K03820	lnt; apolipoprotein N-acyltransferase [EC:2.3.1.-]	0.000760306	0.0083005	6.98903	1.85202
FPR1 HFD vs WT HFD	K03824	yhbS; putative acetyltransferase [EC:2.3.1.-]	0.000704872	0.0083005	7.40064	1.52356
FPR1 HFD vs WT HFD	K03832	tonB; periplasmic protein TonB	0.000760306	0.0083005	8.93235	1.76362
FPR1 HFD vs WT HFD	K03839	fldA, nifF, isiB; flavodoxin I	0.000760306	0.0083005	9.36495	1.68637
FPR1 HFD vs WT HFD	K03924	moxR; MoxR-like ATPase [EC:3.6.3.-]	0.000760306	0.0083005	8.05649	1.86187
FPR1 HFD vs WT HFD	K03928	yvaK; carboxylesterase [EC:3.1.1.1]	0.000748989	0.0083005	6.17513	1.5841
FPR1 HFD vs WT HFD	K03931	ygjK; putative isomerase	0.000760306	0.0083005	7.29852	1.9057
FPR1 HFD vs WT HFD	K03932	lpqC; polyhydroxybutyrate depolymerase	0.000578562	0.0083005	Inf	NA
FPR1 HFD vs WT HFD	K03973	pspC; phage shock protein C	0.000754633	0.0083005	10.032	1.09481
FPR1 HFD vs WT HFD	K04024	eutJ; ethanolamine utilization protein EutJ	0.000760306	0.0083005	9.29188	1.26498
FPR1 HFD vs WT HFD	K04029	eutP; ethanolamine utilization protein EutP	0.000760306	0.0083005	7.03532	1.77418
FPR1 HFD vs WT HFD	K04031	eutS; ethanolamine utilization protein EutS	0.000760306	0.0083005	7.03532	1.77418
FPR1 HFD vs WT HFD	K04084	dsbD; thiol:disulfide interchange protein DsbD [EC:1.8.1.8]	0.000760306	0.0083005	8.74906	1.56522
FPR1 HFD vs WT HFD	K04086	clpL; ATP-dependent Clp protease ATP-binding subunit ClpL	0.000760306	0.0083005	8.15737	0.950525
FPR1 HFD vs WT HFD	K04477	ycdX; putative hydrolase	0.000760306	0.0083005	6.95994	1.54654
FPR1 HFD vs WT HFD	K04749	rsbV; anti-sigma B factor antagonist	0.000760306	0.0083005	6.83242	1.64082
FPR1 HFD vs WT HFD	K04761	oxyR; LysR family transcriptional regulator, hydrogen peroxide-inducible genes activator	0.000760306	0.0083005	9.0729	1.87481
FPR1 HFD vs WT HFD	K04762	hslR; ribosome-associated heat shock protein Hsp15	0.000760306	0.0083005	8.49346	1.69766
FPR1 HFD vs WT HFD	K04773	sppA; protease IV [EC:3.4.21.-]	0.000760306	0.0083005	4.80486	2.19228
FPR1 HFD vs WT HFD	K05306	phnX; phosphonoacetaldehyde hydrolase [EC:3.11.1.1]	0.000760306	0.0083005	9.05979	1.7255
FPR1 HFD vs WT HFD	K05338	lrgA; holin-like protein	0.000760306	0.0083005	6.29473	1.50009
FPR1 HFD vs WT HFD	K05339	lrgB; holin-like protein LrgB	0.000760306	0.0083005	6.29473	1.50009
FPR1 HFD vs WT HFD	K05343	treS; maltose alpha-D-glucosyltransferase/ alpha-amylase [EC:5.4.99.16 3.2.1.1]	0.000760306	0.0083005	Inf	NA
FPR1 HFD vs WT HFD	K05346	deoR; deoxyribonucleoside regulator	0.000754633	0.0083005	Inf	NA
FPR1 HFD vs WT HFD	K05367	pbpC; penicillin-binding protein 1C [EC:2.4.1.-]	0.000760306	0.0083005	9.40262	1.61606
FPR1 HFD vs WT HFD	K05515	mrdA; penicillin-binding protein 2	0.000760306	0.0083005	4.93076	2.28045
FPR1 HFD vs WT HFD	K05595	marC; multiple antibiotic resistance protein	0.000760306	0.0083005	8.66722	1.69325
FPR1 HFD vs WT HFD	K05606	MCEE, epi; methylmalonyl-CoA/ethylmalonyl-CoA epimerase [EC:5.1.99.1]	0.000760306	0.0083005	4.93	2.43485
FPR1 HFD vs WT HFD	K05776	modF; molybdate transport system ATP-binding protein	0.000760306	0.0083005	8.60691	1.59761
FPR1 HFD vs WT HFD	K05785	rfaH; transcriptional antiterminator RfaH	0.000699486	0.0083005	3.79219	1.74004
FPR1 HFD vs WT HFD	K05800	ybaO; Lrp/AsnC family transcriptional regulator	0.000760306	0.0083005	6.72283	1.95517
FPR1 HFD vs WT HFD	K05801	djlA; DnaJ like chaperone protein	0.000760306	0.0083005	7.88774	1.65136
FPR1 HFD vs WT HFD	K05807	bamD; outer membrane protein assembly factor BamD	0.000760306	0.0083005	8.37795	1.70666
FPR1 HFD vs WT HFD	K05811	yfiM; putative lipoprotein	0.000704872	0.0083005	7.68862	1.22342
FPR1 HFD vs WT HFD	K05895	cobK-cbiJ; precorrin-6A/cobalt-precorrin-6A reductase [EC:1.3.1.54 1.3.1.106]	0.000760306	0.0083005	8.21973	1.75042
FPR1 HFD vs WT HFD	K05945	E2.4.1.58	0.000743374	0.0083005	Inf	NA
FPR1 HFD vs WT HFD	K06041	kdsD, kpsF; arabinose-5-phosphate isomerase [EC:5.3.1.13]	0.000760306	0.0083005	8.23216	1.58921
FPR1 HFD vs WT HFD	K06042	cobH-cbiC; precorrin-8X/cobalt-precorrin-8 methylmutase [EC:5.4.99.61 5.4.99.60]	0.000760306	0.0083005	8.47877	1.57864
FPR1 HFD vs WT HFD	K06076	fadL; long-chain fatty acid transport protein	0.000760306	0.0083005	8.39644	1.57419
FPR1 HFD vs WT HFD	K06079	cutF, nlpE; copper homeostasis protein (lipoprotein)	0.000760306	0.0083005	8.16359	1.54187
FPR1 HFD vs WT HFD	K06142	hlpA, ompH; outer membrane protein	0.000760306	0.0083005	9.18976	1.64129
FPR1 HFD vs WT HFD	K06155	gntT; Gnt-I system high-affinity gluconate transporter	0.000699486	0.0083005	3.79219	1.74004
FPR1 HFD vs WT HFD	K06167	phnP; phosphoribosyl 1,2-cyclic phosphate phosphodiesterase [EC:3.1.4.55]	0.000760306	0.0083005	7.67593	1.94974
FPR1 HFD vs WT HFD	K06177	rluA; tRNA pseudouridine32 synthase / 23S rRNA pseudouridine746 synthase [EC:5.4.99.28 5.4.99.29]	0.000760306	0.0083005	7.70404	1.73107
FPR1 HFD vs WT HFD	K06188	aqpZ; aquaporin Z	0.000760306	0.0083005	4.32644	1.81555
FPR1 HFD vs WT HFD	K06194	nlpD; lipoprotein NlpD	0.000760306	0.0083005	7.57016	1.52028
FPR1 HFD vs WT HFD	K06223	dam; DNA adenine methylase [EC:2.1.1.72]	0.000760306	0.0083005	4.30282	1.30673
FPR1 HFD vs WT HFD	K06400	spoIVCA; site-specific DNA recombinase	0.000760306	0.0083005	6.40051	1.25594
FPR1 HFD vs WT HFD	K06861	lptB; lipopolysaccharide export system ATP-binding protein [EC:3.6.3.-]	0.000760306	0.0083005	8.29452	1.73821
FPR1 HFD vs WT HFD	K06871	K06871; uncharacterized protein	0.000760306	0.0083005	8.61105	1.50683
FPR1 HFD vs WT HFD	K06891	clpS; ATP-dependent Clp protease adaptor protein ClpS	0.000760306	0.0083005	6.90116	1.73413
FPR1 HFD vs WT HFD	K06894	K06894	0.000760306	0.0083005	8.04246	1.45926
FPR1 HFD vs WT HFD	K06897	K06897; 7,8-dihydropterin-6-yl-methyl-4-(beta-D-ribofuranosyl)aminobenzene 5'-phosphate synthase [EC:2.5.1.105]	0.000748989	0.0083005	Inf	NA
FPR1 HFD vs WT HFD	K06903	K06903	0.00073223	0.0083005	3.7511	1.6887
FPR1 HFD vs WT HFD	K06907	K06907	0.00073223	0.0083005	3.74999	1.68777
FPR1 HFD vs WT HFD	K06909	xtmB; phage terminase large subunit	0.000748989	0.0083005	Inf	NA
FPR1 HFD vs WT HFD	K06911	K06911	0.000760306	0.0083005	8.32285	1.56606
FPR1 HFD vs WT HFD	K06921	K06921	0.000748989	0.0083005	Inf	NA
FPR1 HFD vs WT HFD	K06934	K06934	0.000760306	0.0083005	6.90952	1.47735
FPR1 HFD vs WT HFD	K06970	rlmF; 23S rRNA (adenine1618-N6)-methyltransferase [EC:2.1.1.181]	0.000754633	0.0083005	9.46747	1.47462
FPR1 HFD vs WT HFD	K06989	nadX; aspartate dehydrogenase [EC:1.4.1.21]	0.000760306	0.0083005	8.24236	1.83155
FPR1 HFD vs WT HFD	K06996	K06996	0.000760306	0.0083005	Inf	NA
FPR1 HFD vs WT HFD	K07002	K07002	0.000760306	0.0083005	6.60496	1.2395
FPR1 HFD vs WT HFD	K07011	K07011	0.000760306	0.0083005	6.17703	1.91647
[truncated: 313 more rows]
